# Supplementary material for: An Intestinal Th17 Subset is Associated with Inflammation in Crohn’s Disease and Activated by Adherent-invasive Escherichia coli
Source: PubMed Central journal article supplement — J Crohns Colitis. 2023 Jul 18;17(12):1988–2001. doi: 10.1093/ecco-jcc/jjad119 (PMC10798865; doi:10.1093/ecco-jcc/jjad119), 2023-07-18
Supplement: jjad119_suppl_supplementary_materials.pdf [file jjad119_suppl_supplementary_materials.pdf]

# Supplementary Figure 1

**A**

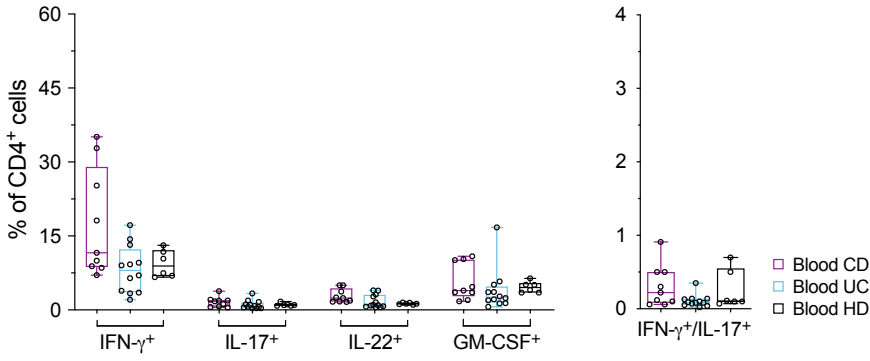

**B**

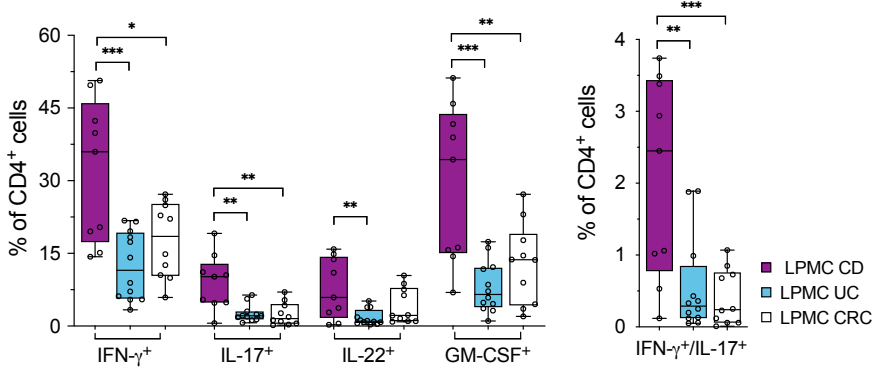

**C**

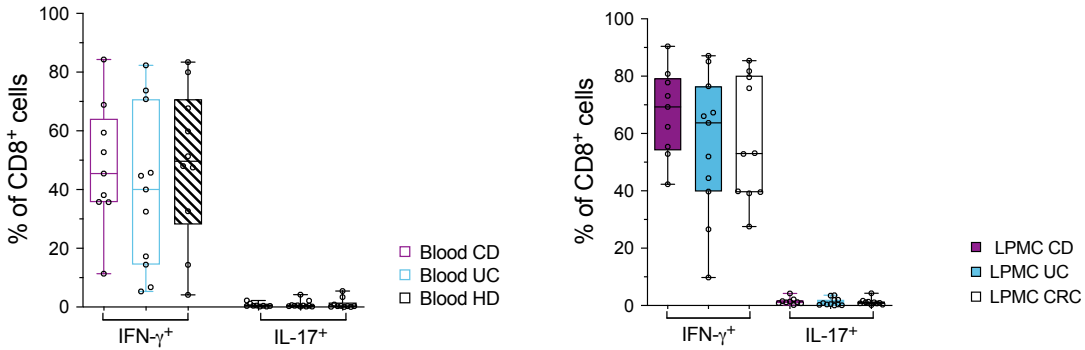

**D**

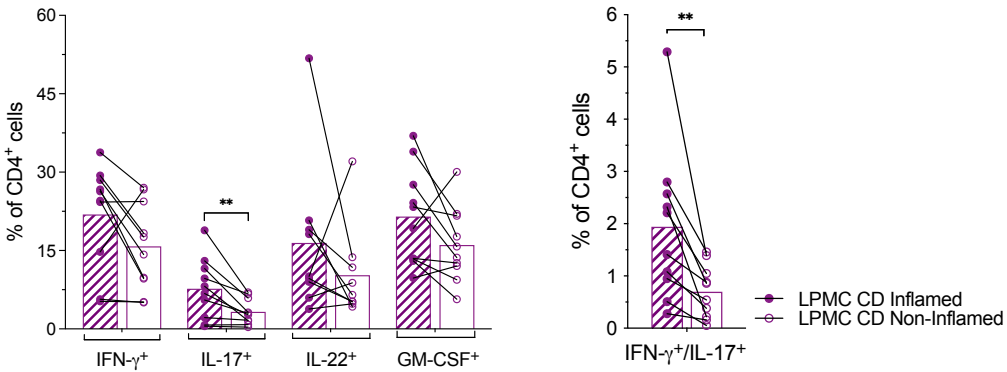

# Supplementary Figure 2

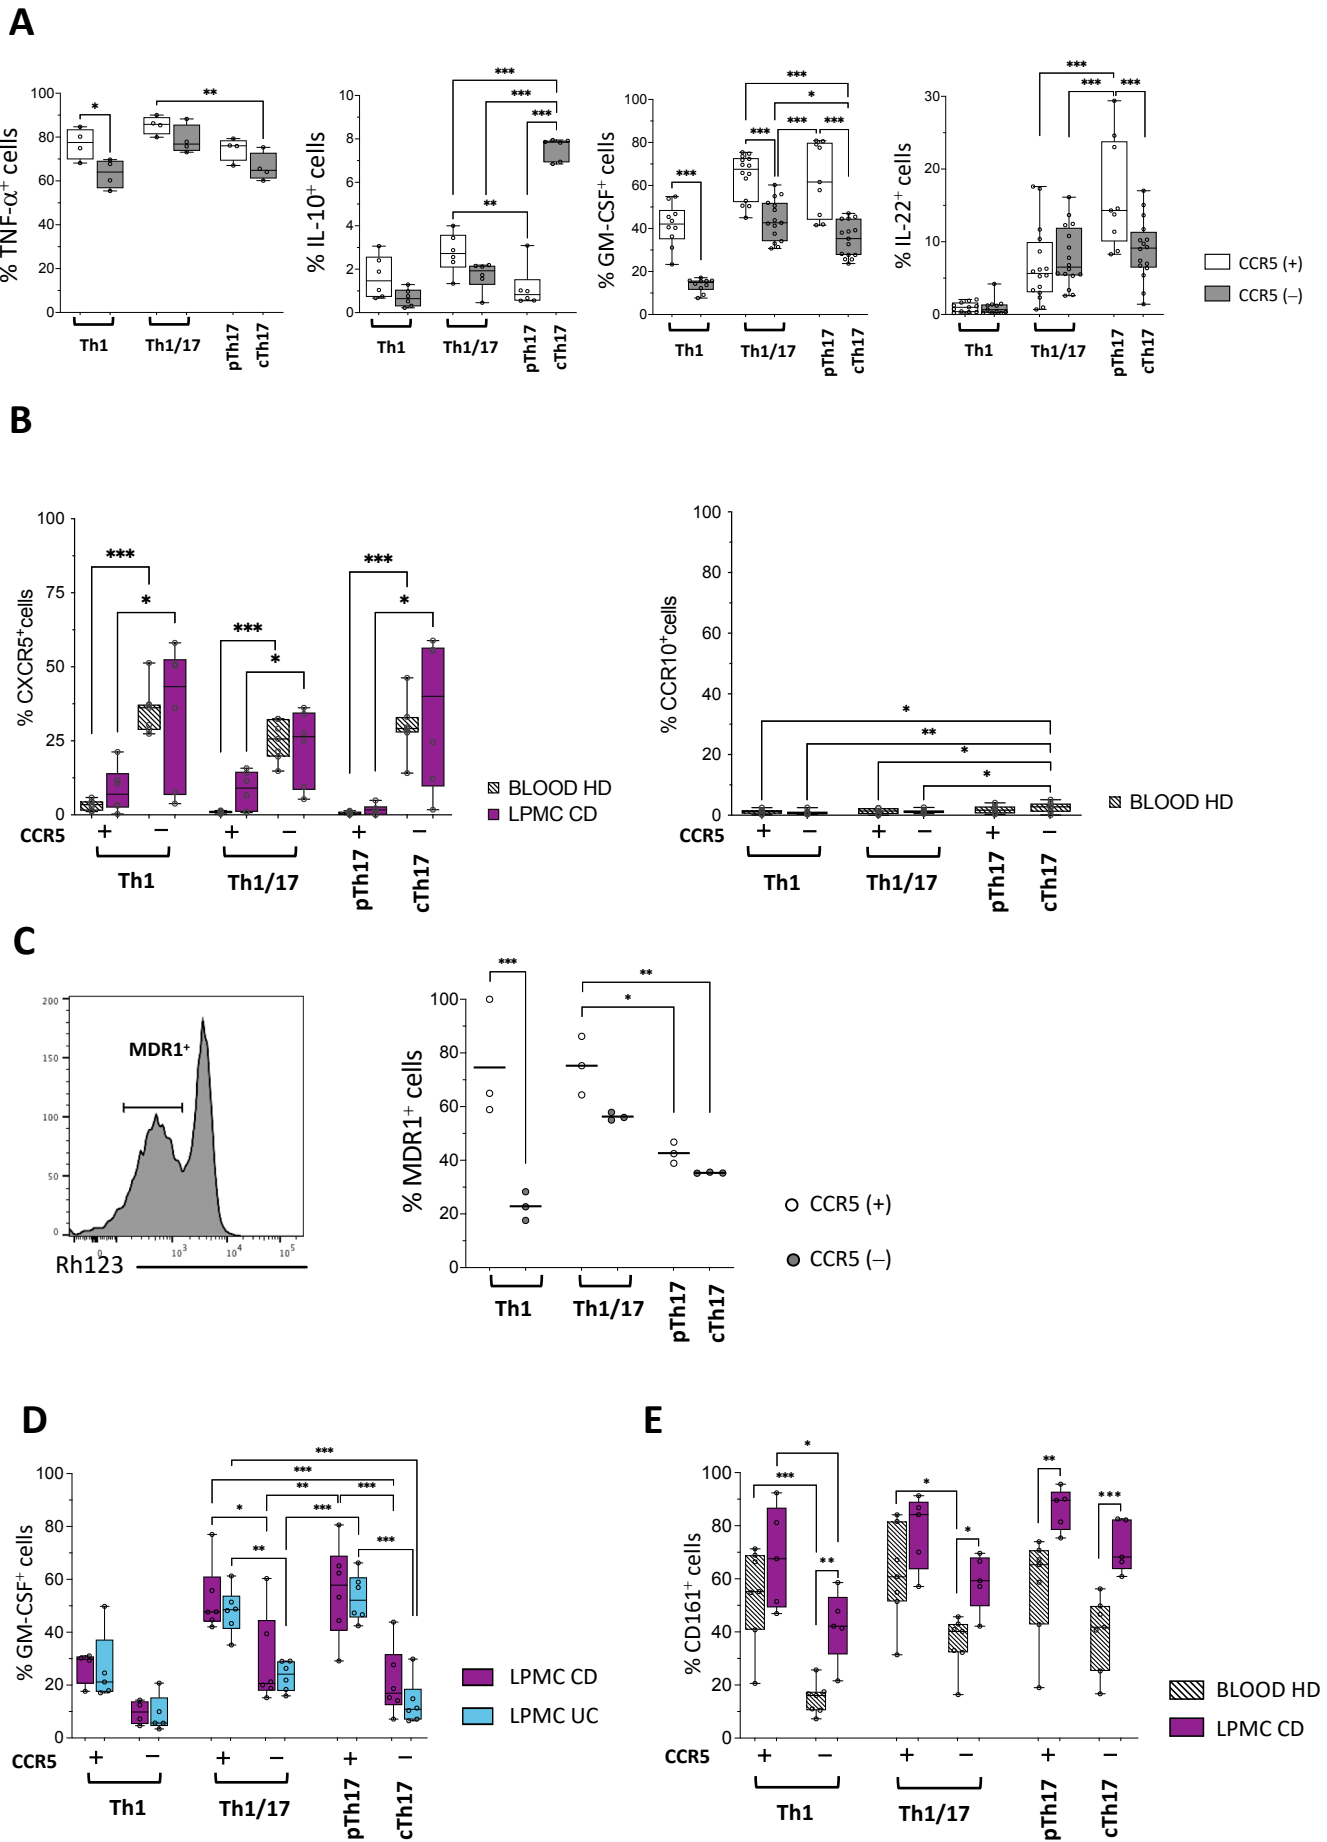

# Supplementary Figure 3

**A**

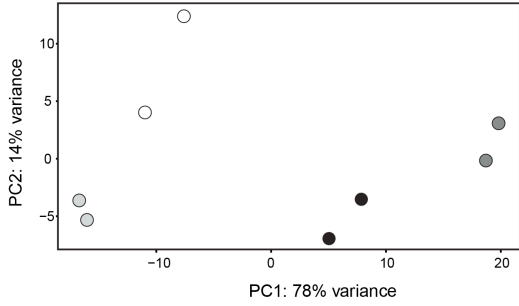

**Blood**

- Th1/17 CCR5 (+)
- Th1/17 CCR5 (-)
- cTh17
- pTh17

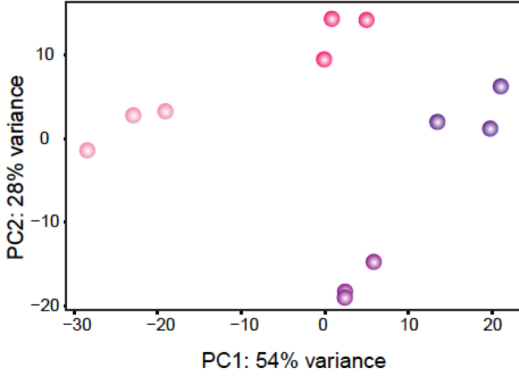

**Intestine**

- Th1/17 CCR5 (-)
- Th1/17 CCR5 (+)
- cTh17
- pTh17

**B**

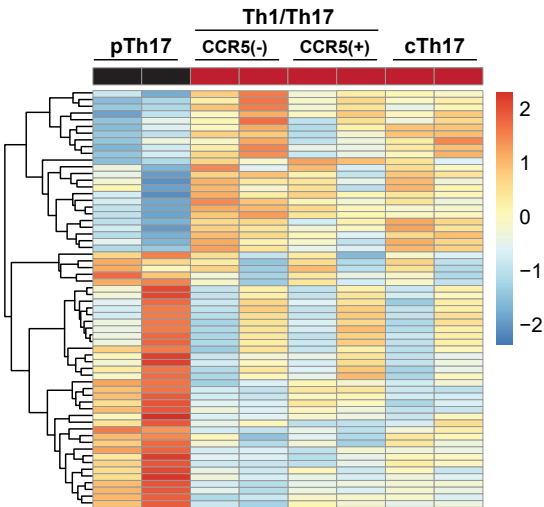

**Blood**

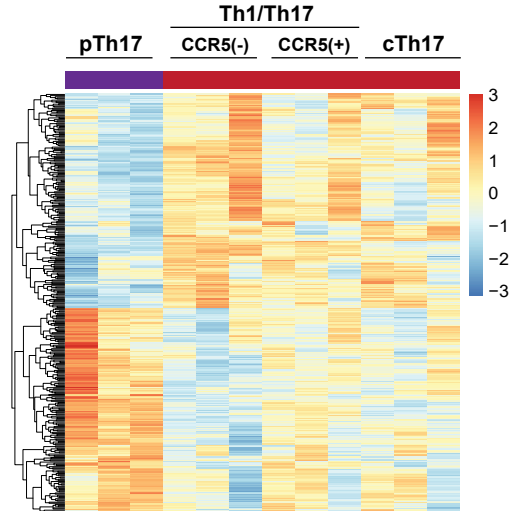

**Intestine**

# Supplementary Figure 4

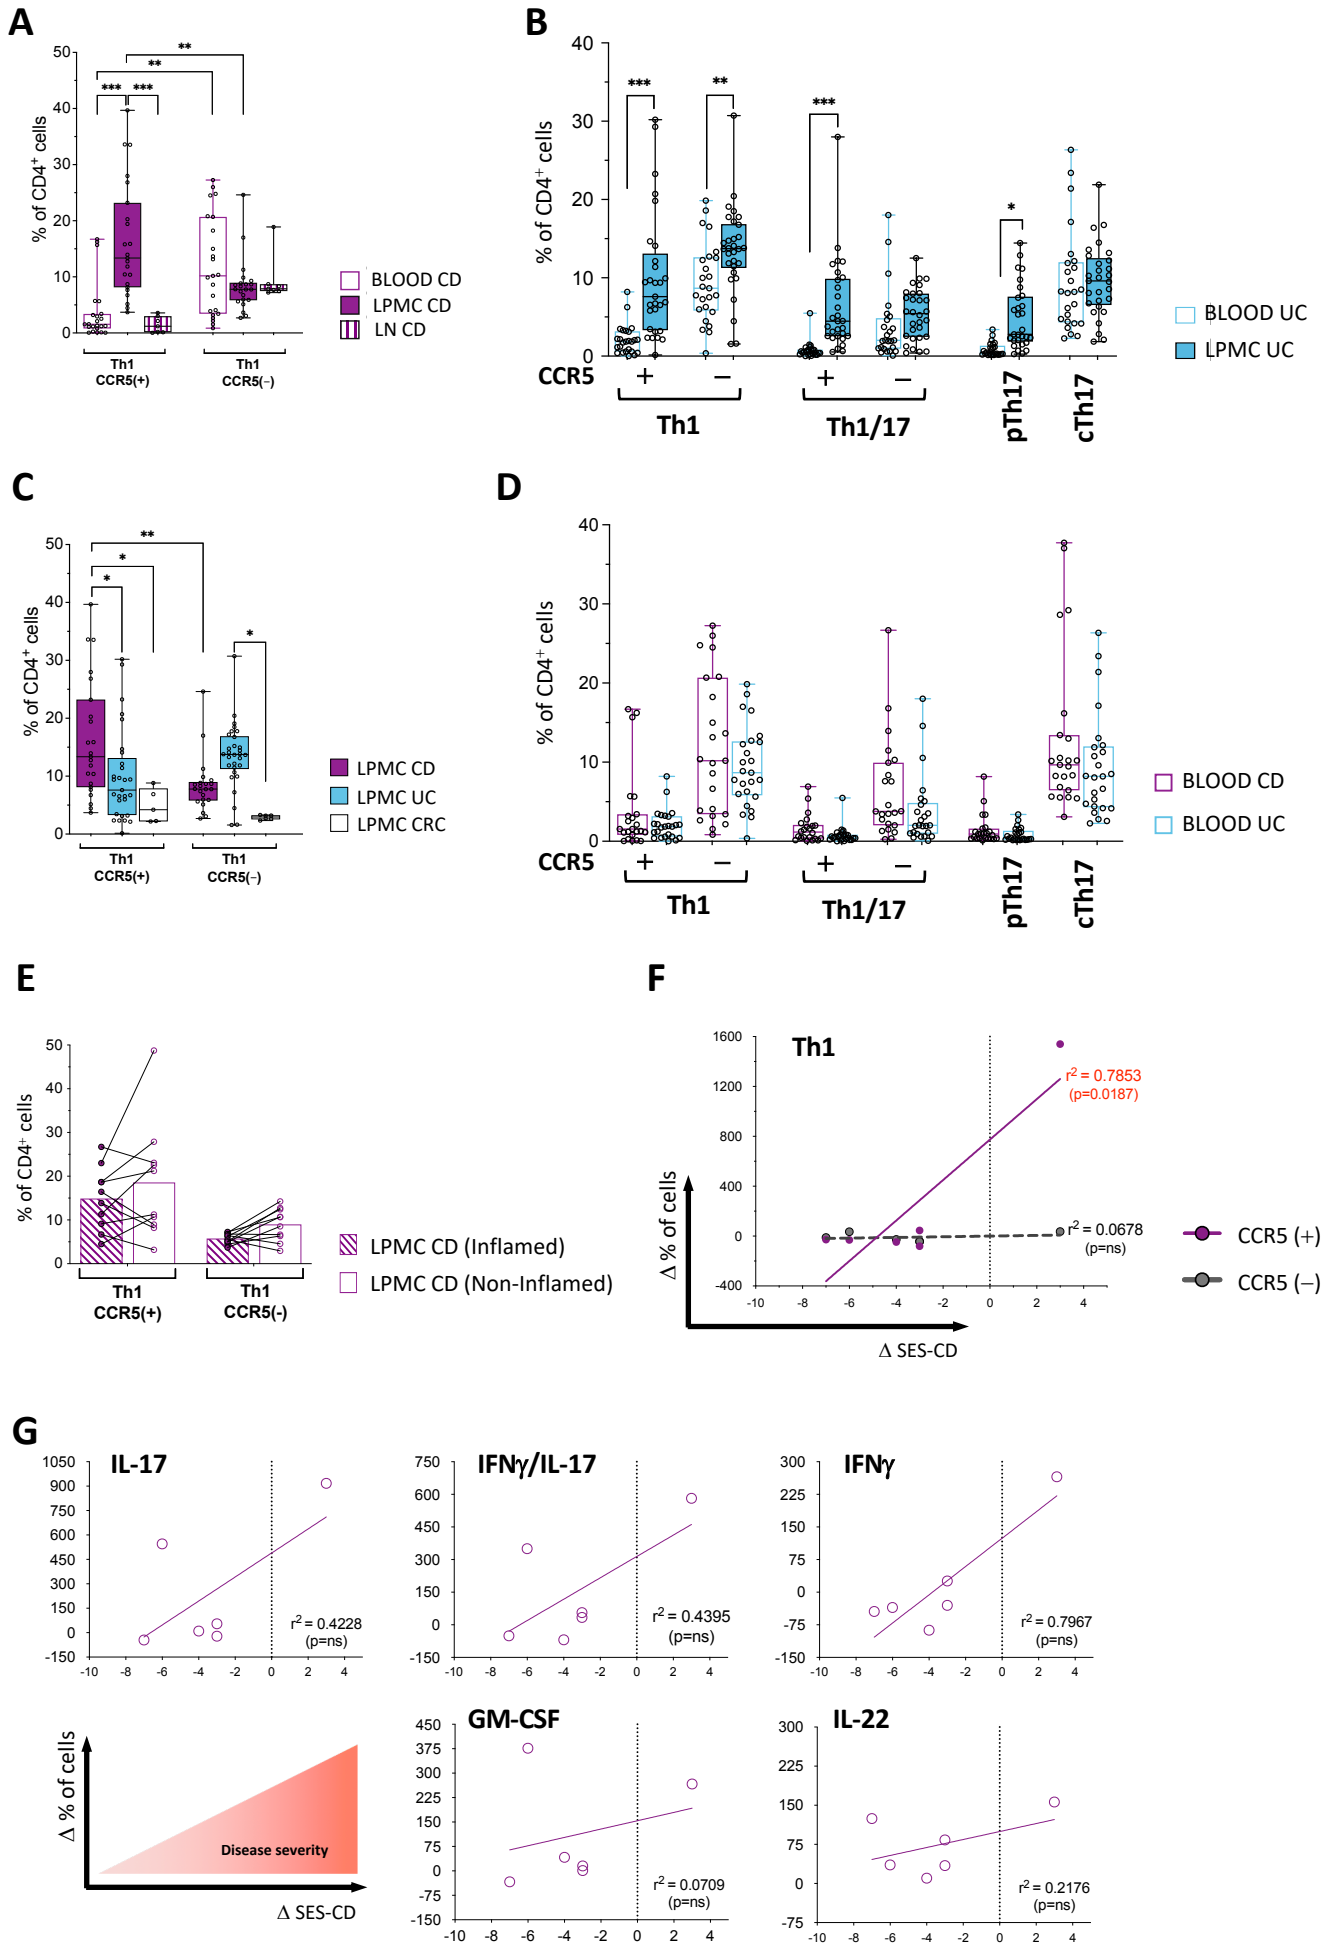



# Supplementary Figure 5

**A**

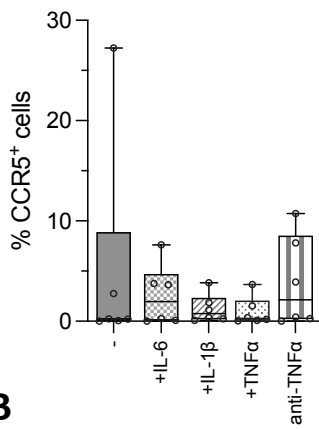

**B**

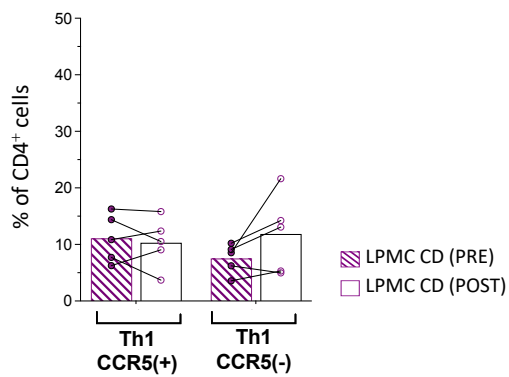

# Supplementary Figure 6

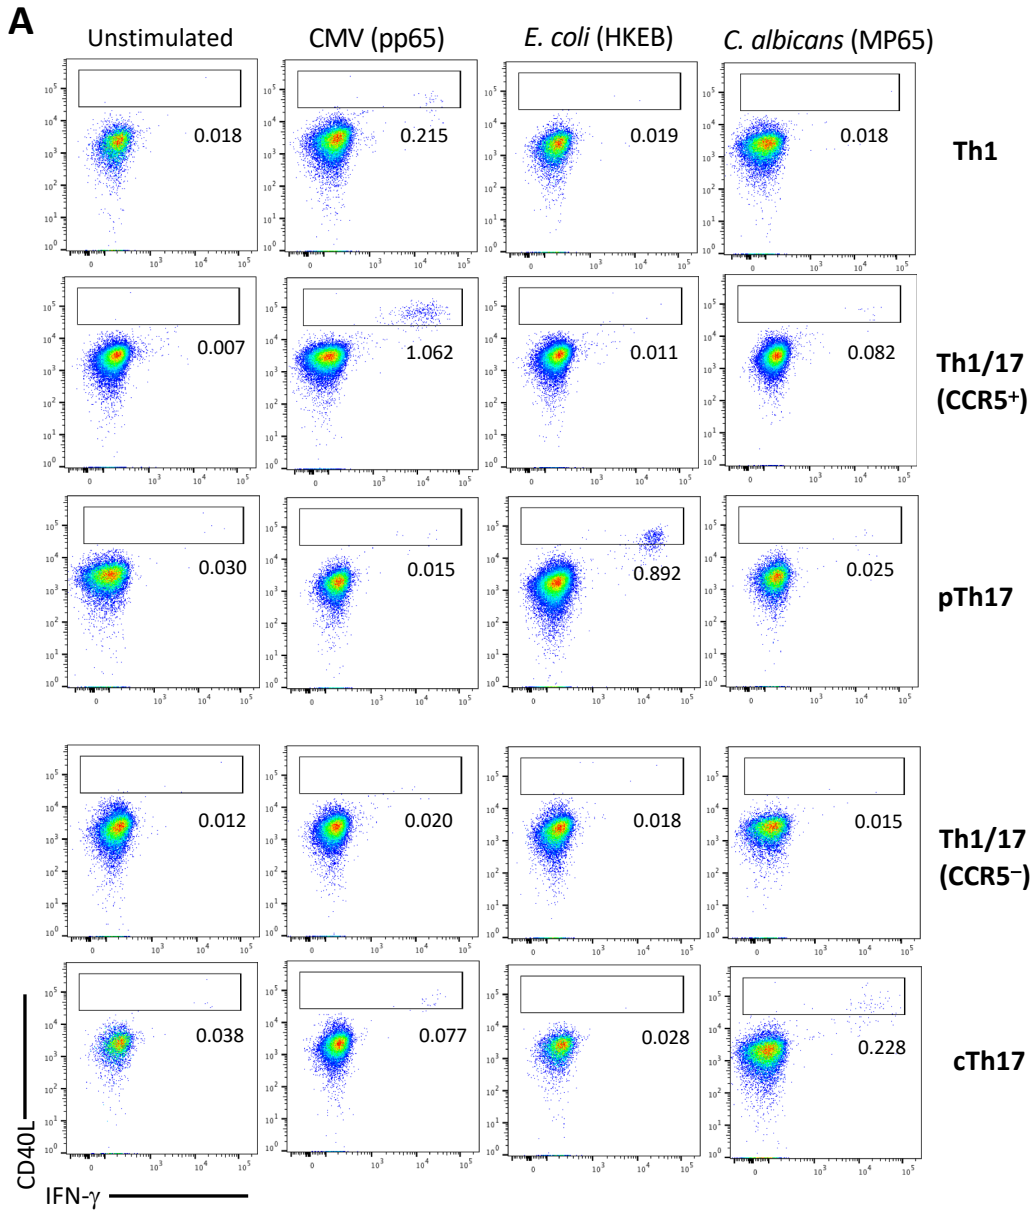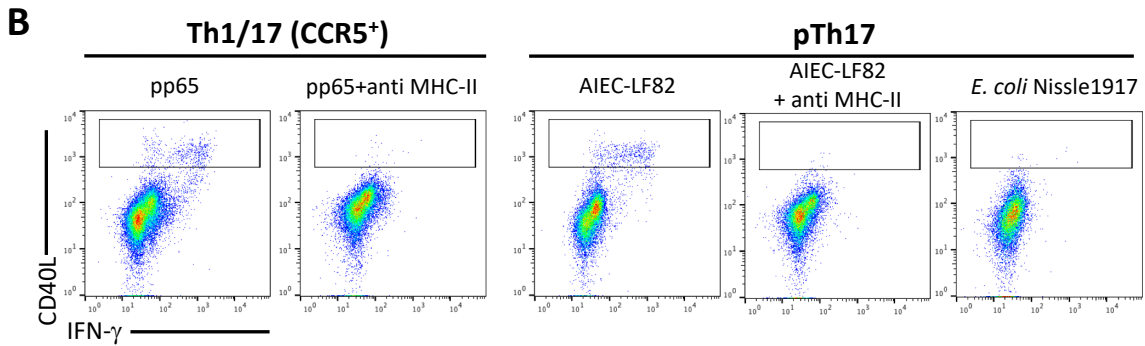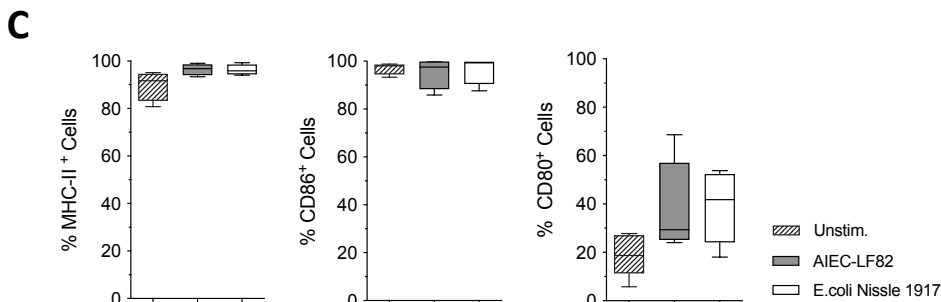

# Supplementary Figure 7

**A**

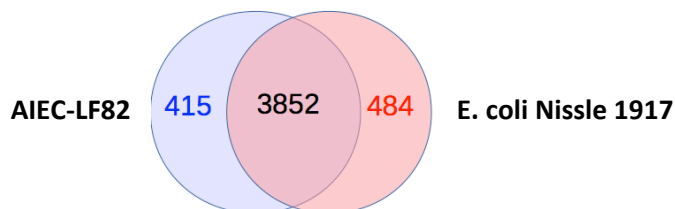

**B**

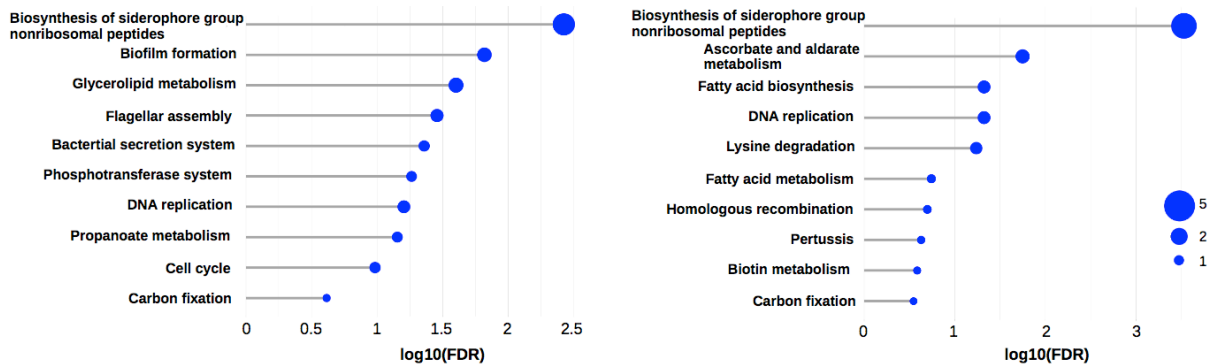

**C**

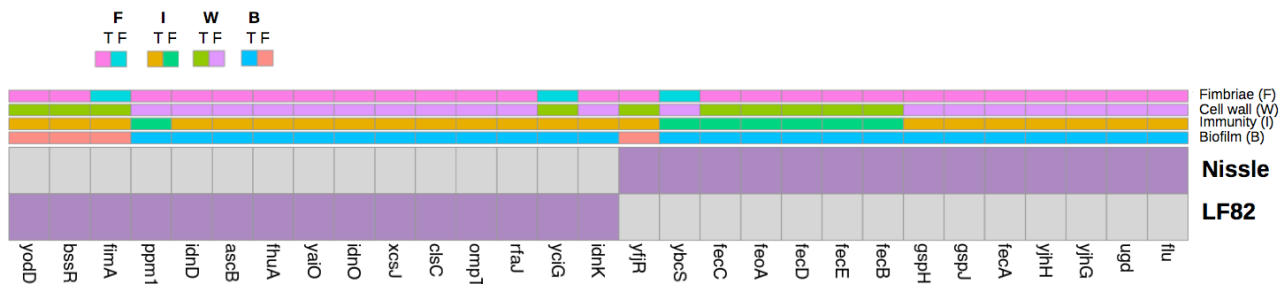

# Supplementary Figure 8

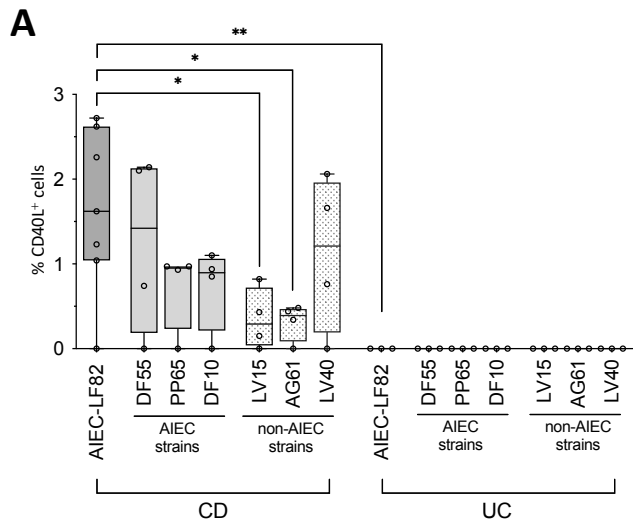

# Supplementary Figure 9

**A**

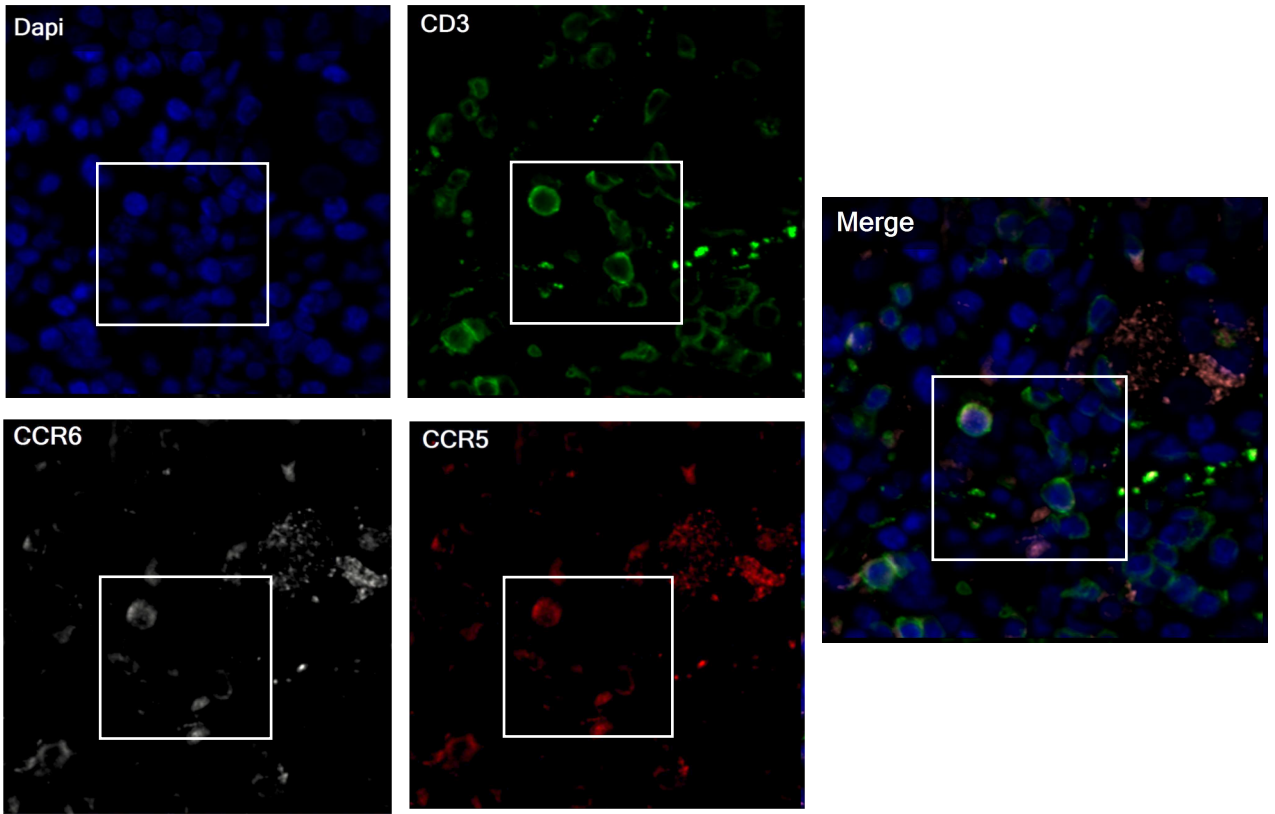

**B**

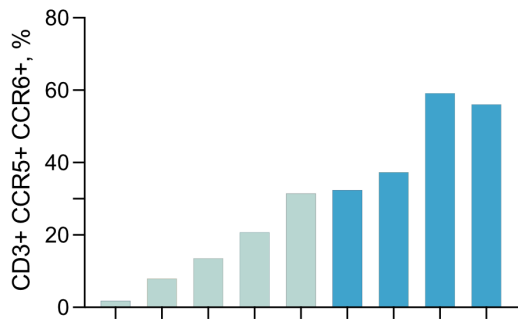

**Table S1:** Baseline clinical characteristics of Crohn's Disease (CD) patients treated with Infliximab or Risankizumab included in the study.

|                                   | <b>Infliximab<br/>(n= 6)</b> | <b>Risankizumab<br/>(n=5)</b> |
|-----------------------------------|------------------------------|-------------------------------|
| Age, median (IQR)                 | 30 (26 - 30)                 | 34 (31 - 40)                  |
| Sex, female, n                    | 1                            | 3                             |
| Disease duration, median (IQR)    | 8 (3 - 13)                   | 11 (11 - 12)                  |
| Smoking, active, n                | 2                            | 2                             |
| Previous surgery, n               | 3                            | 3                             |
| Localization                      |                              |                               |
| - ileal                           | 1                            | 3                             |
| - colon                           | 1                            | 1                             |
| - ileocolonic                     | 4                            | 1                             |
| Behaviour                         |                              |                               |
| - Non stricturing non penetrating | 2                            | 3                             |
| - Stricturing                     | 1                            | 1                             |
| - Penetrating                     | 3                            | 1                             |
| Extraintestinal manifestations, n | 2                            | 3                             |
| Previous immunomodulators, n      | 4                            | 4                             |
| Baseline HBI score, median (IQR)  | 7,5 (6,25 - 8)               | 7 (6 - 11)                    |
| Baseline SES-CD                   | 4,5 (3,25 - 6,5)             | 7 (7 - 8)                     |
| Baseline steroids, n              | 1                            | 3                             |
| Baseline immunomodulators, n      | 2                            | 1                             |

HBI: Harvey Bradshaw Score

SES-CD: simplified endoscopic score for Crohn's disease

**Table S2: Monoclonal antibodies and FACS reagents used in this study.**

| <b><i>Antibodies</i></b>                  | <b>Clone</b> | <b>Company</b> |
|-------------------------------------------|--------------|----------------|
| <b><u>Th-cell subsets:</u></b>            |              |                |
| <i>Anti-human CD4</i>                     | RPA-T4       | Biolegend      |
| <i>Anti-human CD25</i>                    | BC96         | Biolegend      |
| <i>Anti-human CD127 (IL-7R)</i>           | A019D5       | Biolegend      |
| <i>Anti-human CXCR3</i>                   | 1C6          | BD             |
| <i>Anti-human CCR6</i>                    | G034E3       | Biolegend      |
| <i>Anti-human CCR5</i>                    | 2D7          | BD             |
| <b><u>Intracellular cytokines:</u></b>    |              |                |
| <i>Anti-human IL-17</i>                   | BL168        | Biolegend      |
| <i>Anti-human IFN-<math>\gamma</math></i> | B27          | Biolegend      |
| <i>Anti-human GM-CSF</i>                  | BVD2-21C11   | BD Biosciences |
| <i>Anti-human IL-22</i>                   | 2G12A41      | Biolegend      |
| <i>Anti-human TNF-<math>\alpha</math></i> | 1D6          | Biolegend      |
| <i>Anti-human IL-10</i>                   | JES3-19F1    | Biolegend      |
| <i>Anti-human CD154 (CD40L)</i>           | 24-31        | Biolegend      |
| <b><u>Transcription factors:</u></b>      |              |                |
| <i>Anti-human pSTAT3</i>                  | pY705        | BD Biosciences |
| <i>Anti-human T-bet</i>                   | O4-46        | BD Biosciences |
| <i>Anti-human ROR<math>\gamma</math>t</i> | Q21-559      | BD Biosciences |
| <b><u>Surface markers:</u></b>            |              |                |
| <i>Anti-human CD161</i>                   | DX12         | BD             |
| <i>Anti-human PDI</i>                     | EH12.2H7     | Biolegend      |
| <i>Anti-human CD27</i>                    | M-T271       | Biolegend      |
| <i>Anti-human IL-1R1</i>                  | FAB269P      | R&D systems    |
| <i>Anti-human CCR7</i>                    | G043H7       | Biolegend      |
| <i>Anti-human CCR4</i>                    | L291H4       | Biolegend      |
| <i>Anti-human CXCR5</i>                   | J252D4       | Biolegend      |
| <i>Anti-human CCR10</i>                   | 6588-5       | Biolegend      |
| <i>Rh123 (Rhodamine 123)</i>              | Cat#R8004    | Sigma Aldrich  |
| <i>Anti-human HLA-DR</i>                  | G46-6        | BD             |
| <i>Anti-human CD80</i>                    | BB1          | BD             |
| <i>Anti-human CD86</i>                    | BU63         | Biolegend      |

**Table S3: Microbial antigens used in this study.**

| Microbial antigens                               | Description                                                        | Final concentration             |
|--------------------------------------------------|--------------------------------------------------------------------|---------------------------------|
| <b><u>Virus</u></b>                              |                                                                    |                                 |
| Cytomegalovirus (CMV)                            | PepTivator® CMV pp65<br>(Milteny Biotec)                           | 1µg peptide/ml<br>(0.6 nmol/ml) |
| <i>Epstein-Barr virus (EBV)</i>                  | PepTivator® EBV Consensus pool<br>(Milteny Biotec)                 |                                 |
| <i>JC Virus (JCV)</i>                            | PepTivator® JCV VP1<br>(Milteny Biotec)                            |                                 |
| <i>Varicella-zoster virus (VZV)</i>              | PepMix VZV - IE63<br>(JPT Peptide Technologies GmbH)               |                                 |
| <b><u>Fungi</u></b>                              |                                                                    |                                 |
| <i>Candida albicans</i>                          | PepTivator® <i>C. albicans</i> MP65<br>(Milteny Biotec)            | 1µg peptide/ml<br>(0.6 nmol/ml) |
| <b><u>Bacteria</u></b>                           |                                                                    |                                 |
| <i>Staphylococcus aureus</i>                     | heat-killed <i>S. aureus</i> - HKSA<br>(InvivoGen)                 | 10 <sup>7</sup> CFU/ml          |
| <i>Salmonella enterica serovar typhimurium</i>   | bacterial lysates of <i>S. typhimurium</i> SL1344<br>FB62 strain   |                                 |
| <i>Shigella flexneri</i>                         | bacterial lysates of <i>S. flexneri</i> serotype 5a<br>M90T strain |                                 |
| <i>Lactobacillus paracasei</i>                   | bacterial lysates of <i>L. paracasei</i><br>CBA L74 strain         |                                 |
| <i>Adherent-Invasive Escherichia coli (AIEC)</i> | bacterial lysates of <i>AIEC</i> strain LF82                       |                                 |
|                                                  | bacterial lysates of <i>AIEC</i> strain DF55                       |                                 |
|                                                  | bacterial lysates of <i>AIEC</i> strain PP65                       |                                 |
|                                                  | bacterial lysates of <i>AIEC</i> strain DF10                       |                                 |
| <i>Escherichia coli (non-AIEC)</i>               | Heat killed <i>E. coli</i> strain 0111:B4<br>(InvivoGen)           |                                 |
|                                                  | bacterial lysates of <i>E. coli</i> Nissle 1917 strain             |                                 |
|                                                  | bacterial lysates of <i>E. coli</i> strain LV15                    |                                 |
|                                                  | bacterial lysates of <i>E. coli</i> strain AG61                    |                                 |
|                                                  | bacterial lysates of <i>E. coli</i> strain LV40                    |                                 |



**Table S4 A: up-regulated genes in circulating pTh17-cells as compared to cTh17-cells**

| gene_id            | gene_name | baseMean    | log2FoldChange | lfcSE       | stat        | pvalue      | padj        |
|--------------------|-----------|-------------|----------------|-------------|-------------|-------------|-------------|
| ENSG00000163508.12 | EOMES     | 626.4131388 | 6.682896762    | 0.458455649 | 14.57697551 | 3.94E-48    | 5.08E-45    |
| ENSG00000271503.5  | CCL5      | 3934.335083 | 6.031884636    | 0.263438912 | 22.896711   | 5.01E-116   | 8.40E-112   |
| ENSG00000221869.4  | CEBPD     | 1046.38127  | 5.545629598    | 0.528273274 | 10.49765315 | 8.86E-26    | 4.12E-23    |
| ENSG00000131459.12 | GFPT2     | 328.167101  | 5.449187761    | 0.373658019 | 14.5833556  | 3.58E-48    | 5.01E-45    |
| ENSG00000160791.13 | CCR5      | 1182.601033 | 5.327644167    | 0.310225925 | 17.17343311 | 4.20E-66    | 1.41E-62    |
| ENSG00000065833.8  | ME1       | 365.4458024 | 5.252924232    | 0.766830626 | 6.850175327 | 7.38E-12    | 8.19E-10    |
| ENSG00000115607.9  | IL18RAP   | 2210.959465 | 5.035872356    | 0.748679062 | 6.726343254 | 1.74E-11    | 1.85E-09    |
| ENSG00000115523.16 | GNLY      | 2333.623062 | 4.997749966    | 0.258267875 | 19.35103217 | 2.00E-83    | 1.12E-79    |
| ENSG00000145649.7  | GZMA      | 1694.964544 | 4.920242265    | 0.573775187 | 8.57520921  | 9.89E-18    | 2.22E-15    |
| ENSG00000057704.11 | TMCC3     | 402.2505951 | 4.902442463    | 0.417534231 | 11.74141448 | 7.82E-32    | 5.96E-29    |
| ENSG00000172215.5  | CXCR6     | 1274.979735 | 4.897053307    | 0.22229927  | 22.02910207 | 1.52E-107   | 1.27E-103   |
| ENSG00000186810.7  | CXCR3     | 1587.158809 | 4.815498643    | 0.256867382 | 18.74702272 | 2.05E-78    | 8.58E-75    |
| ENSG00000105374.9  | NKG7      | 447.8512636 | 4.581300095    | 0.405111685 | 11.30873354 | 1.19E-29    | 7.38E-27    |
| ENSG00000196781.14 | TLE1      | 350.5361691 | 4.334608853    | 0.396475008 | 10.9328678  | 8.03E-28    | 4.21E-25    |
| ENSG00000080493.14 | SLC4A4    | 91.20822057 | 4.150414645    | 0.575836477 | 7.207627188 | 5.69E-13    | 7.02E-11    |
| ENSG00000050165.17 | DKK3      | 102.282729  | 4.147486005    | 0.449233919 | 9.232352751 | 2.65E-20    | 7.52E-18    |
| ENSG00000115956.9  | PLEK      | 1296.519868 | 4.138845839    | 0.554589464 | 7.462900225 | 8.46E-14    | 1.21E-11    |
| ENSG00000169252.5  | ADRB2     | 484.8778165 | 3.913923107    | 0.247328134 | 15.82481964 | 2.10E-56    | 5.86E-53    |
| ENSG00000144290.16 | SLC4A10   | 1245.747324 | 3.545991938    | 0.289641201 | 12.24270553 | 1.84E-34    | 1.62E-31    |
| ENSG00000124507.10 | PACSIN1   | 110.4335766 | 3.516111476    | 0.55519734  | 6.333084149 | 2.40E-10    | 2.04E-08    |
| ENSG00000112183.14 | RBM24     | 35.63033633 | 3.458245063    | 0.65805393  | 5.255260863 | 1.48E-07    | 8.02E-06    |
| ENSG00000180644.6  | PRF1      | 1689.202896 | 3.402096325    | 0.221718837 | 15.34419163 | 3.87E-53    | 8.12E-50    |
| ENSG00000169554.17 | ZEB2      | 951.207903  | 3.368934262    | 0.265456778 | 12.69108399 | 6.63E-37    | 6.94E-34    |
| ENSG00000168229.3  | PTGDR     | 244.7469518 | 3.328428286    | 0.825852043 | 4.030296124 | 5.57E-05    | 0.001516468 |
| ENSG00000127318.10 | IL22      | 27.03548091 | 3.278079415    | 0.642788219 | 5.099781414 | 3.40E-07    | 1.67E-05    |
| ENSG00000155629.14 | PIK3AP1   | 154.4251183 | 3.254589434    | 0.360541867 | 9.02693899  | 1.77E-19    | 4.70E-17    |
| ENSG00000062524.15 | LTK       | 3896.235812 | 3.244058598    | 0.45454626  | 7.136916274 | 9.54E-13    | 1.14E-10    |
| ENSG00000073861.2  | TBX21     | 1245.773512 | 3.23994837     | 0.207266396 | 15.63180731 | 4.42E-55    | 1.06E-51    |
| ENSG00000121807.5  | CCR2      | 1339.875195 | 3.105956908    | 0.299560386 | 10.36838333 | 3.45E-25    | 1.52E-22    |
| ENSG00000116667.12 | C1orf21   | 115.9689331 | 3.097251697    | 0.479157212 | 6.463957174 | 1.02E-10    | 9.35E-09    |
| ENSG00000162878.12 | PKDCC     | 77.93766568 | 3.068517439    | 0.688174254 | 4.458925081 | 8.24E-06    | 0.000277368 |
| ENSG00000159618.15 | ADGRG5    | 238.5263018 | 3.008564398    | 0.333911324 | 9.010069993 | 2.06E-19    | 5.40E-17    |
| ENSG00000254087.7  | LYN       | 331.8245395 | 2.998633974    | 0.383485206 | 7.819425446 | 5.31E-15    | 8.47E-13    |
| ENSG00000197057.8  | DTHD1     | 80.74411365 | 2.978012936    | 0.563255324 | 5.287145652 | 1.24E-07    | 6.83E-06    |
| ENSG00000156738.17 | MS4A1     | 137.4939004 | 2.947966713    | 0.463506644 | 6.360139062 | 2.02E-10    | 1.73E-08    |
| ENSG00000141934.9  | PLPP2     | 87.07357058 | 2.899296525    | 0.451469212 | 6.421914156 | 1.35E-10    | 1.21E-08    |
| ENSG00000130635.15 | COL5A1    | 710.9179888 | 2.796800646    | 0.23110313  | 12.10195916 | 1.03E-33    | 8.23E-31    |
| ENSG00000171476.21 | HOPX      | 1257.653246 | 2.787559183    | 0.273549643 | 10.19032287 | 2.19E-24    | 8.75E-22    |
| ENSG00000162543.5  | UBXN10    | 109.8986595 | 2.761183576    | 0.362887673 | 7.608920844 | 2.76E-14    | 4.21E-12    |
| ENSG00000136856.17 | SLC2A8    | 162.6975923 | 2.749642718    | 0.379616479 | 7.243212213 | 4.38E-13    | 5.48E-11    |
| ENSG00000120549.17 | KIAA1217  | 99.30299201 | 2.715007967    | 0.530029199 | 5.122374334 | 3.02E-07    | 1.51E-05    |
| ENSG00000164483.16 | SAMD3     | 1141.002037 | 2.710378766    | 0.775093479 | 3.496841141 | 0.000470802 | 0.009343054 |
| ENSG00000169896.16 | ITGAM     | 310.5124155 | 2.70337456     | 0.286575298 | 9.433383051 | 3.97E-21    | 1.19E-18    |
| ENSG00000104951.15 | IL411     | 1335.459443 | 2.679313638    | 0.243665719 | 10.99585798 | 4.00E-28    | 2.24E-25    |
| ENSG00000095397.13 | WHRN      | 1510.363951 | 2.633582997    | 0.238988253 | 11.01971733 | 3.07E-28    | 1.78E-25    |

|                    |            |             |             |             |             |             |             |
|--------------------|------------|-------------|-------------|-------------|-------------|-------------|-------------|
| ENSG00000081985.10 | IL12RB2    | 866.7042118 | 2.621604766 | 0.835419808 | 3.13806872  | 0.00170065  | 0.026067824 |
| ENSG00000117560.7  | FASLG      | 69.08769009 | 2.520474892 | 0.405079202 | 6.222177984 | 4.90E-10    | 3.88E-08    |
| ENSG00000007264.14 | MATK       | 693.4877003 | 2.519268039 | 0.217041013 | 11.60733634 | 3.78E-31    | 2.64E-28    |
| ENSG00000186197.13 | EDARADD    | 82.89464598 | 2.502303064 | 0.415022615 | 6.029317373 | 1.65E-09    | 1.21E-07    |
| ENSG00000204475.9  | NCR3       | 105.0162986 | 2.490202465 | 0.408867785 | 6.090483415 | 1.13E-09    | 8.43E-08    |
| ENSG00000124019.9  | FAM124B    | 67.36339937 | 2.482365412 | 0.504054751 | 4.924793206 | 8.44E-07    | 3.82E-05    |
| ENSG00000109458.8  | GAB1       | 32.63197812 | 2.479708917 | 0.772040935 | 3.211887874 | 0.001318658 | 0.021052166 |
| ENSG00000176845.12 | METRNL     | 103.5718582 | 2.470782448 | 0.382998794 | 6.451149427 | 1.11E-10    | 1.00E-08    |
| ENSG00000171954.12 | CYP4F22    | 35.85521499 | 2.46226809  | 0.576138245 | 4.273745252 | 1.92E-05    | 0.000599123 |
| ENSG00000116016.13 | EPAS1      | 112.0057537 | 2.456027429 | 0.58040489  | 4.231576043 | 2.32E-05    | 0.000715332 |
| ENSG00000178860.8  | MSC        | 347.6137529 | 2.441514466 | 0.657869872 | 3.711242256 | 0.000206245 | 0.004711874 |
| ENSG00000150457.8  | LATS2      | 699.4958333 | 2.412314054 | 0.19371213  | 12.45308722 | 1.35E-35    | 1.25E-32    |
| ENSG00000204287.13 | HLA-DRA    | 365.0714368 | 2.40749943  | 0.288752704 | 8.337582293 | 7.58E-17    | 1.50E-14    |
| ENSG00000076706.15 | MCAM       | 1068.806163 | 2.406421543 | 0.296508915 | 8.115848878 | 4.82E-16    | 8.70E-14    |
| ENSG00000170522.9  | ELOVL6     | 557.9001242 | 2.39356672  | 0.235625955 | 10.15833218 | 3.04E-24    | 1.16E-21    |
| ENSG00000137501.17 | SYTL2      | 5502.140276 | 2.368820411 | 0.188568911 | 12.56209414 | 3.41E-36    | 3.37E-33    |
| ENSG00000173905.8  | GOLIM4     | 81.21896665 | 2.342632413 | 0.409643444 | 5.718710858 | 1.07E-08    | 7.04E-07    |
| ENSG00000107317.11 | PTGDS      | 397.3234233 | 2.341324132 | 0.598382935 | 3.912752179 | 9.13E-05    | 0.002332582 |
| ENSG00000113758.13 | DBN1       | 47.99678249 | 2.333967892 | 0.514313987 | 4.538021423 | 5.68E-06    | 0.000199209 |
| ENSG00000196189.12 | SEMA4A     | 158.1232213 | 2.312943425 | 0.47662118  | 4.85279195  | 1.22E-06    | 5.22E-05    |
| ENSG00000011422.11 | PLAUR      | 299.8392024 | 2.310655609 | 0.254226534 | 9.08896318  | 1.00E-19    | 2.75E-17    |
| ENSG00000181104.6  | F2R        | 1873.874383 | 2.301325189 | 0.553678349 | 4.156429796 | 3.23E-05    | 0.000939469 |
| ENSG00000075651.15 | PLD1       | 361.2020519 | 2.298892802 | 0.343346692 | 6.695543759 | 2.15E-11    | 2.25E-09    |
| ENSG00000077984.5  | CST7       | 1040.516608 | 2.293016105 | 0.240004678 | 9.554047539 | 1.25E-21    | 3.80E-19    |
| ENSG00000189350.12 | FAM179A    | 288.3774294 | 2.279484336 | 0.358649505 | 6.355743708 | 2.07E-10    | 1.77E-08    |
| ENSG00000178075.19 | GRAMD1C    | 247.4536876 | 2.277051275 | 0.717470348 | 3.173721786 | 0.001504979 | 0.0234926   |
| ENSG00000157404.15 | KIT        | 602.536403  | 2.276476508 | 0.262386029 | 8.676058378 | 4.10E-18    | 9.82E-16    |
| ENSG00000100298.15 | APOBEC3H   | 192.3268472 | 2.245430904 | 0.309586339 | 7.253003831 | 4.08E-13    | 5.22E-11    |
| ENSG00000204161.13 | C10orf128  | 985.5708965 | 2.244233365 | 0.200531127 | 11.19144645 | 4.49E-29    | 2.69E-26    |
| ENSG00000061337.15 | LZTS1      | 206.9064306 | 2.230830597 | 0.268079784 | 8.321517424 | 8.68E-17    | 1.67E-14    |
| ENSG00000143842.14 | SOX13      | 509.0782905 | 2.222621012 | 0.33711544  | 6.593056103 | 4.31E-11    | 4.20E-09    |
| ENSG00000196126.10 | HLA-DRB1   | 112.1061146 | 2.203664123 | 0.379255739 | 5.810496443 | 6.23E-09    | 4.23E-07    |
| ENSG00000148848.14 | ADAM12     | 646.1796112 | 2.172977492 | 0.198139392 | 10.9669131  | 5.51E-28    | 2.98E-25    |
| ENSG00000116574.5  | RHOA       | 581.4045929 | 2.168855106 | 0.201812277 | 10.7468938  | 6.13E-27    | 3.11E-24    |
| ENSG00000080573.6  | COL5A3     | 4766.905869 | 2.143275941 | 0.655952624 | 3.267424904 | 0.001085307 | 0.018055065 |
| ENSG00000108370.16 | RGS9       | 66.50082315 | 2.137772612 | 0.423385402 | 5.049235529 | 4.44E-07    | 2.14E-05    |
| ENSG00000088826.17 | SMOX       | 58.87738331 | 2.137479049 | 0.438534604 | 4.874139992 | 1.09E-06    | 4.77E-05    |
| ENSG00000169429.10 | CXCL8      | 2034.189937 | 2.107522773 | 0.328759308 | 6.410534153 | 1.45E-10    | 1.29E-08    |
| ENSG00000124145.6  | SDC4       | 364.8476695 | 2.101395579 | 0.218368663 | 9.62315541  | 6.38E-22    | 2.02E-19    |
| ENSG00000198400.11 | NTRK1      | 32.15884998 | 2.101078889 | 0.568452413 | 3.696138573 | 0.000218904 | 0.004967244 |
| ENSG00000205730.6  | ITPRIPL2   | 93.66619281 | 2.08235497  | 0.376068789 | 5.537165086 | 3.07E-08    | 1.89E-06    |
| ENSG00000085563.14 | ABCB1      | 4112.828724 | 2.07585854  | 0.201651832 | 10.29427068 | 7.48E-25    | 3.22E-22    |
| ENSG00000124772.11 | CPNE5      | 72.88191991 | 2.071267565 | 0.415881599 | 4.980426086 | 6.34E-07    | 2.96E-05    |
| ENSG00000157985.18 | AGAP1      | 673.3080834 | 2.058637703 | 0.240316802 | 8.566349445 | 1.07E-17    | 2.30E-15    |
| ENSG00000175048.16 | ZDHHC14    | 328.9193457 | 2.045168482 | 0.324757367 | 6.297527601 | 3.02E-10    | 2.52E-08    |
| ENSG00000198369.9  | SPRED2     | 92.82463509 | 2.044955597 | 0.42528955  | 4.808384308 | 1.52E-06    | 6.30E-05    |
| ENSG00000091436.16 | AC013461.1 | 232.8907538 | 2.03731042  | 0.254787783 | 7.996107173 | 1.28E-15    | 2.22E-13    |
| ENSG00000149573.8  | MPZL2      | 84.62072926 | 2.028641042 | 0.458324429 | 4.426211898 | 9.59E-06    | 0.000319719 |

|                    |          |             |             |             |             |             |             |
|--------------------|----------|-------------|-------------|-------------|-------------|-------------|-------------|
| ENSG00000185340.15 | GAS2L1   | 196.1576608 | 2.011360249 | 0.258146239 | 7.791553561 | 6.62E-15    | 1.05E-12    |
| ENSG00000186648.14 | CARMIL3  | 65.22597324 | 1.998121357 | 0.472590162 | 4.228021482 | 2.36E-05    | 0.000722357 |
| ENSG00000181264.8  | TMEM136  | 26.64253656 | 1.992800919 | 0.631142587 | 3.157449615 | 0.001591557 | 0.024666198 |
| ENSG00000163393.12 | SLC22A15 | 99.22650203 | 1.991965319 | 0.445068234 | 4.475640283 | 7.62E-06    | 0.000258605 |
| ENSG00000125735.10 | TNFSF14  | 930.4247659 | 1.988143136 | 0.27206209  | 7.307681634 | 2.72E-13    | 3.56E-11    |
| ENSG00000182511.11 | FES      | 234.3770834 | 1.98207549  | 0.349979382 | 5.663406455 | 1.48E-08    | 9.43E-07    |
| ENSG00000120708.16 | TGFBI    | 350.6744023 | 1.973456787 | 0.272419168 | 7.244192095 | 4.35E-13    | 5.48E-11    |
| ENSG00000162438.11 | CTRC     | 151.7578476 | 1.956953114 | 0.467725003 | 4.183982262 | 2.86E-05    | 0.000839759 |
| ENSG00000163421.8  | PROK2    | 107.102515  | 1.944996463 | 0.39564246  | 4.916045825 | 8.83E-07    | 3.97E-05    |
| ENSG00000104321.10 | TRPA1    | 31.11084982 | 1.944204713 | 0.557556902 | 3.487006809 | 0.000488459 | 0.009602541 |
| ENSG00000147852.15 | VLDLR    | 110.0168292 | 1.939496827 | 0.375046855 | 5.171345399 | 2.32E-07    | 1.18E-05    |
| ENSG00000137801.10 | THBS1    | 2085.591796 | 1.924444909 | 0.227463615 | 8.460451622 | 2.66E-17    | 5.38E-15    |
| ENSG00000171860.4  | C3AR1    | 364.3805197 | 1.913355894 | 0.253242121 | 7.55544095  | 4.17E-14    | 6.25E-12    |
| ENSG00000179388.8  | EGR3     | 81.78231338 | 1.899260524 | 0.437864027 | 4.337557798 | 1.44E-05    | 0.000460188 |
| ENSG00000125810.9  | CD93     | 117.0889493 | 1.893141437 | 0.54769701  | 3.456548792 | 0.00054714  | 0.010485706 |
| ENSG00000116741.7  | RGS2     | 3043.00767  | 1.891762074 | 0.162723978 | 11.6255889  | 3.05E-31    | 2.23E-28    |
| ENSG00000115738.9  | ID2      | 3282.999995 | 1.886645967 | 0.164132594 | 11.49464541 | 1.40E-30    | 9.41E-28    |
| ENSG00000050438.16 | SLC4A8   | 105.7364125 | 1.885770769 | 0.35223964  | 5.353658574 | 8.62E-08    | 4.90E-06    |
| ENSG00000213949.8  | ITGA1    | 1292.886476 | 1.878413769 | 0.253291629 | 7.416012036 | 1.21E-13    | 1.67E-11    |
| ENSG00000213171.2  | LINGO4   | 59.10202749 | 1.872647642 | 0.415137734 | 4.510906839 | 6.46E-06    | 0.000223187 |
| ENSG00000115339.13 | GALNT3   | 442.5717627 | 1.872303096 | 0.265113661 | 7.062265621 | 1.64E-12    | 1.91E-10    |
| ENSG00000116991.10 | SIPA1L2  | 447.5139719 | 1.870382869 | 0.239018396 | 7.825267431 | 5.07E-15    | 8.17E-13    |
| ENSG00000196576.14 | PLXNB2   | 341.489875  | 1.846558407 | 0.362043518 | 5.100376936 | 3.39E-07    | 1.67E-05    |
| ENSG00000145220.13 | LYAR     | 3725.35262  | 1.823479143 | 0.46052691  | 3.959549606 | 7.51E-05    | 0.001986128 |
| ENSG00000188886.3  | ASTL     | 339.2567595 | 1.82323614  | 0.367445972 | 4.96191625  | 6.98E-07    | 3.21E-05    |
| ENSG00000172543.7  | CTSW     | 1332.639353 | 1.822329693 | 0.225759706 | 8.07198826  | 6.92E-16    | 1.23E-13    |
| ENSG00000035664.11 | DAPK2    | 470.3955685 | 1.793613042 | 0.307917695 | 5.824975535 | 5.71E-09    | 3.89E-07    |
| ENSG00000075426.11 | FOSL2    | 7942.305838 | 1.791392784 | 0.265495569 | 6.747354723 | 1.51E-11    | 1.61E-09    |
| ENSG00000152969.17 | JAKMIP1  | 386.786226  | 1.786987097 | 0.294378452 | 6.070373302 | 1.28E-09    | 9.51E-08    |
| ENSG00000134830.5  | C5AR2    | 45.34408347 | 1.785527276 | 0.496082746 | 3.599252931 | 0.000319133 | 0.006782682 |
| ENSG00000276231.4  | PIK3R6   | 40.48388807 | 1.782420339 | 0.566824396 | 3.144572377 | 0.001663298 | 0.02563588  |
| ENSG00000115009.11 | CCL20    | 603.9510322 | 1.779740559 | 0.20760374  | 8.57277694  | 1.01E-17    | 2.23E-15    |
| ENSG00000120875.8  | DUSP4    | 1962.212506 | 1.756683476 | 0.493656285 | 3.55851537  | 0.000372957 | 0.007683184 |
| ENSG00000197943.9  | PLCG2    | 100.3678237 | 1.752348048 | 0.456125972 | 3.841807206 | 0.000122132 | 0.002994192 |
| ENSG00000139629.15 | GALNT6   | 310.2739142 | 1.750170549 | 0.273977985 | 6.387997006 | 1.68E-10    | 1.48E-08    |
| ENSG00000111817.16 | DSE      | 1663.8973   | 1.747938277 | 0.240543022 | 7.266634715 | 3.69E-13    | 4.75E-11    |
| ENSG00000099194.5  | SCD      | 203.4488968 | 1.747575638 | 0.319359612 | 5.472124749 | 4.45E-08    | 2.66E-06    |
| ENSG00000008256.15 | CYTH3    | 2930.45607  | 1.745655078 | 0.177074202 | 9.858325266 | 6.31E-23    | 2.20E-20    |
| ENSG00000124564.17 | SLC17A3  | 109.2682148 | 1.738052934 | 0.36169066  | 4.805357524 | 1.54E-06    | 6.38E-05    |
| ENSG00000065989.15 | PDE4A    | 498.3854542 | 1.731671112 | 0.280752903 | 6.167954425 | 6.92E-10    | 5.35E-08    |
| ENSG00000070614.14 | NDST1    | 55.69408694 | 1.726789113 | 0.475413727 | 3.632181856 | 0.000281035 | 0.006144296 |
| ENSG00000121594.11 | CD80     | 75.82923664 | 1.72238632  | 0.447894414 | 3.84551865  | 0.000120298 | 0.002957877 |
| ENSG00000074657.13 | ZNF532   | 678.64219   | 1.719957085 | 0.179242677 | 9.595689559 | 8.34E-22    | 2.59E-19    |
| ENSG00000144843.11 | ADPRH    | 191.5165268 | 1.713515937 | 0.283476919 | 6.044640037 | 1.50E-09    | 1.10E-07    |
| ENSG00000235162.8  | C12orf75 | 853.4504677 | 1.711678397 | 0.162842735 | 10.51123586 | 7.67E-26    | 3.67E-23    |
| ENSG00000204131.8  | NHSL2    | 2670.410034 | 1.697465435 | 0.197788192 | 8.582238508 | 9.30E-18    | 2.14E-15    |
| ENSG00000131037.14 | EPS8L1   | 47.38443252 | 1.696036913 | 0.485901244 | 3.490497164 | 0.000482123 | 0.009511431 |
| ENSG00000135362.13 | PRR5L    | 1147.946626 | 1.693127248 | 0.284743943 | 5.946139647 | 2.75E-09    | 1.93E-07    |

|                    |           |             |             |             |             |             |             |
|--------------------|-----------|-------------|-------------|-------------|-------------|-------------|-------------|
| ENSG00000160318.6  | CLDND2    | 36.92822285 | 1.690660963 | 0.541338353 | 3.123113214 | 0.001789489 | 0.027082979 |
| ENSG00000115604.10 | IL18R1    | 3153.079684 | 1.686096854 | 0.256848326 | 6.564562368 | 5.22E-11    | 4.97E-09    |
| ENSG00000173930.8  | SLCO4C1   | 43.52460483 | 1.677872912 | 0.553560286 | 3.031057241 | 0.00243699  | 0.034661487 |
| ENSG00000092445.11 | TYRO3     | 30.29960731 | 1.673924646 | 0.554942154 | 3.016394835 | 0.002557999 | 0.035834214 |
| ENSG00000158470.5  | B4GALT5   | 1729.675276 | 1.664851538 | 0.163867986 | 10.15971196 | 3.00E-24    | 1.16E-21    |
| ENSG00000125726.10 | CD70      | 108.592329  | 1.650440562 | 0.377936945 | 4.366973333 | 1.26E-05    | 0.000408619 |
| ENSG00000139318.7  | DUSP6     | 283.7876555 | 1.643598347 | 0.332728851 | 4.939753028 | 7.82E-07    | 3.55E-05    |
| ENSG00000160293.16 | VAV2      | 370.1346601 | 1.640320638 | 0.248902755 | 6.59020684  | 4.39E-11    | 4.21E-09    |
| ENSG00000160593.17 | JAML      | 14040.48103 | 1.639626321 | 0.191353732 | 8.568562021 | 1.05E-17    | 2.28E-15    |
| ENSG00000181215.13 | C4orf50   | 52.46561864 | 1.638582711 | 0.486571051 | 3.367612414 | 0.000758221 | 0.013569487 |
| ENSG00000198756.10 | COLGALT2  | 105.8462199 | 1.632877809 | 0.459488946 | 3.553682458 | 0.000379878 | 0.00778749  |
| ENSG00000124762.13 | CDKN1A    | 3228.018099 | 1.632505474 | 0.217586711 | 7.502781138 | 6.25E-14    | 9.19E-12    |
| ENSG00000143365.16 | RORC      | 2355.170725 | 1.621001881 | 0.178006832 | 9.106402644 | 8.52E-20    | 2.38E-17    |
| ENSG00000146192.14 | FGD2      | 53.75402396 | 1.617531796 | 0.468875241 | 3.449812773 | 0.000560975 | 0.01071412  |
| ENSG00000134247.9  | PTGFRN    | 63.31772684 | 1.613500071 | 0.388387377 | 4.154357646 | 3.26E-05    | 0.000944748 |
| ENSG00000115902.10 | SLC1A4    | 996.696211  | 1.612477585 | 0.231245122 | 6.973023145 | 3.10E-12    | 3.54E-10    |
| ENSG00000179583.18 | CIITA     | 329.6823355 | 1.600448364 | 0.343718688 | 4.656273928 | 3.22E-06    | 0.000122712 |
| ENSG00000231389.7  | HLA-DPA1  | 580.2583435 | 1.592023754 | 0.254828624 | 6.247429077 | 4.17E-10    | 3.32E-08    |
| ENSG00000178773.14 | CPNE7     | 861.92876   | 1.582641345 | 0.25095087  | 6.306578438 | 2.85E-10    | 2.39E-08    |
| ENSG00000204396.10 | VWA7      | 40.40188579 | 1.582531288 | 0.48114897  | 3.289067184 | 0.0010052   | 0.016975028 |
| ENSG00000139187.9  | KLRG1     | 668.3920327 | 1.57886222  | 0.298353373 | 5.291920127 | 1.21E-07    | 6.68E-06    |
| ENSG00000164120.13 | HPGD      | 485.811863  | 1.563339582 | 0.211375072 | 7.396045163 | 1.40E-13    | 1.91E-11    |
| ENSG00000274286.1  | ADRA2B    | 185.1144213 | 1.558908421 | 0.387981173 | 4.018000179 | 5.87E-05    | 0.001592625 |
| ENSG00000106069.20 | CHN2      | 121.6192648 | 1.549289972 | 0.311477419 | 4.974004146 | 6.56E-07    | 3.03E-05    |
| ENSG00000112378.11 | PERP      | 902.4905354 | 1.540525921 | 0.172947954 | 8.90745388  | 5.22E-19    | 1.32E-16    |
| ENSG00000145246.13 | ATP10D    | 299.2399407 | 1.534235182 | 0.24856119  | 6.172464742 | 6.72E-10    | 5.24E-08    |
| ENSG00000163701.18 | IL17RE    | 376.1687526 | 1.530135784 | 0.282093051 | 5.424223587 | 5.82E-08    | 3.42E-06    |
| ENSG00000074527.11 | NTN4      | 810.9690383 | 1.526301415 | 0.30455225  | 5.011624161 | 5.40E-07    | 2.56E-05    |
| ENSG00000110446.10 | SLC15A3   | 80.87294872 | 1.524776511 | 0.460563925 | 3.310672913 | 0.000930719 | 0.015893311 |
| ENSG00000103257.8  | SLC7A5    | 4870.892989 | 1.520308081 | 0.473955265 | 3.207703747 | 0.001337992 | 0.021252821 |
| ENSG00000139289.13 | PHLDA1    | 1440.29888  | 1.51295303  | 0.209433247 | 7.224034628 | 5.05E-13    | 6.27E-11    |
| ENSG00000029153.14 | ARNTL2    | 53.026605   | 1.512659872 | 0.425628946 | 3.553940318 | 0.000379505 | 0.00778749  |
| ENSG00000101665.8  | SMAD7     | 5776.034159 | 1.504110063 | 0.206298115 | 7.290953963 | 3.08E-13    | 4.00E-11    |
| ENSG00000239713.7  | APOBEC3G  | 2316.78349  | 1.498429494 | 0.152920429 | 9.798752877 | 1.14E-22    | 3.90E-20    |
| ENSG00000163754.17 | GYG1      | 1961.899605 | 1.497993901 | 0.149262079 | 10.03599785 | 1.06E-23    | 3.86E-21    |
| ENSG00000006327.13 | TNFRSF12A | 114.2938452 | 1.496007132 | 0.357315372 | 4.186797569 | 2.83E-05    | 0.000830867 |
| ENSG00000120318.15 | ARAP3     | 1181.063633 | 1.493279457 | 0.29428197  | 5.074315145 | 3.89E-07    | 1.89E-05    |
| ENSG00000162772.16 | ATF3      | 983.1503259 | 1.482798456 | 0.20453495  | 7.249609215 | 4.18E-13    | 5.31E-11    |
| ENSG00000196923.13 | PDLIM7    | 176.2587602 | 1.464753243 | 0.28589018  | 5.123482181 | 3.00E-07    | 1.50E-05    |
| ENSG00000159335.15 | PTMS      | 118.702032  | 1.464070609 | 0.455735062 | 3.212547663 | 0.001315633 | 0.021051386 |
| ENSG00000138764.13 | CCNG2     | 1730.877731 | 1.459076098 | 0.142903237 | 10.21023825 | 1.78E-24    | 7.48E-22    |
| ENSG00000088992.17 | TESC      | 85.94575814 | 1.456216376 | 0.402862403 | 3.6146743   | 0.000300725 | 0.006481832 |
| ENSG00000132561.13 | MATN2     | 165.904713  | 1.446260666 | 0.291751524 | 4.957165761 | 7.15E-07    | 3.27E-05    |
| ENSG00000105339.10 | DENND3    | 3383.765631 | 1.446038415 | 0.1743512   | 8.293825443 | 1.10E-16    | 2.07E-14    |
| ENSG00000169641.13 | LUZP1     | 3649.920085 | 1.445836629 | 0.174166078 | 8.301482407 | 1.03E-16    | 1.96E-14    |
| ENSG00000160588.9  | MPZL3     | 4577.203621 | 1.431178551 | 0.146704188 | 9.755539828 | 1.75E-22    | 5.86E-20    |
| ENSG00000054967.12 | RELT      | 1630.184804 | 1.427913502 | 0.231359937 | 6.171826976 | 6.75E-10    | 5.24E-08    |
| ENSG00000109906.13 | ZBTB16    | 190.8471523 | 1.418236872 | 0.434003807 | 3.267798231 | 0.001083876 | 0.018049173 |

|                    |          |             |             |              |             |             |             |
|--------------------|----------|-------------|-------------|--------------|-------------|-------------|-------------|
| ENSG00000196814.14 | MVB12B   | 926.1841875 | 1.415432063 | 0.180635472  | 7.835847803 | 4.66E-15    | 7.58E-13    |
| ENSG00000073282.12 | TP63     | 46.7169545  | 1.410843453 | 0.447688114  | 3.151398055 | 0.001624909 | 0.025080959 |
| ENSG00000165424.6  | ZCCHC24  | 127.7136297 | 1.398887763 | 0.3041115813 | 4.599852104 | 4.23E-06    | 0.000154461 |
| ENSG00000198910.12 | L1CAM    | 86.23332104 | 1.396131725 | 0.458475045  | 3.04516405  | 0.002325534 | 0.033251313 |
| ENSG00000182621.17 | PLCB1    | 598.0527151 | 1.391693261 | 0.270484388  | 5.145188868 | 2.67E-07    | 1.35E-05    |
| ENSG00000122877.14 | EGR2     | 179.6517008 | 1.389726831 | 0.33883243   | 4.101516589 | 4.10E-05    | 0.001160684 |
| ENSG00000121297.6  | TSHZ3    | 54.4047254  | 1.387103534 | 0.462120486  | 3.001605805 | 0.002685597 | 0.037157405 |
| ENSG00000147650.11 | LRP12    | 354.9937131 | 1.386978088 | 0.193364173  | 7.172880411 | 7.34E-13    | 8.86E-11    |
| ENSG00000136286.14 | MYO1G    | 6125.858085 | 1.386508433 | 0.239309549  | 5.793786493 | 6.88E-09    | 4.63E-07    |
| ENSG00000131981.15 | LGALS3   | 2264.103993 | 1.384560776 | 0.177800408  | 7.787163119 | 6.85E-15    | 1.07E-12    |
| ENSG00000185920.15 | PTCH1    | 1136.199211 | 1.383402932 | 0.207663838  | 6.661742098 | 2.71E-11    | 2.72E-09    |
| ENSG00000134107.4  | BHLHE40  | 12182.11164 | 1.381563834 | 0.227748387  | 6.066184939 | 1.31E-09    | 9.72E-08    |
| ENSG00000063438.16 | AHRR     | 407.548823  | 1.380103599 | 0.358026111  | 3.854756834 | 0.000115845 | 0.002860972 |
| ENSG00000186642.15 | PDE2A    | 85.02923751 | 1.379534315 | 0.408229058  | 3.379314354 | 0.000726669 | 0.013130934 |
| ENSG00000150045.11 | KLRF1    | 134.8859921 | 1.377166585 | 0.381870137  | 3.606374134 | 0.000310505 | 0.006657223 |
| ENSG00000138835.22 | RGS3     | 937.7533357 | 1.375990884 | 0.296875052  | 4.634915844 | 3.57E-06    | 0.000133806 |
| ENSG00000197629.5  | MPEG1    | 168.9656631 | 1.374183674 | 0.363411012  | 3.781348474 | 0.000155981 | 0.003710139 |
| ENSG00000158321.15 | AUTS2    | 4806.540729 | 1.373698486 | 0.141733341  | 9.692133673 | 3.26E-22    | 1.07E-19    |
| ENSG00000113070.7  | HBEGF    | 176.4427429 | 1.371721672 | 0.401285941  | 3.4183148   | 0.000630102 | 0.011714166 |
| ENSG00000180263.13 | FGD6     | 71.34779108 | 1.362762501 | 0.423234251  | 3.219877643 | 0.001282453 | 0.020605604 |
| ENSG00000141682.11 | PMAIP1   | 2488.207868 | 1.356047783 | 0.22108557   | 6.133587923 | 8.59E-10    | 6.55E-08    |
| ENSG00000175352.10 | NRIP3    | 222.8483218 | 1.343624989 | 0.336346184  | 3.994768046 | 6.48E-05    | 0.001739465 |
| ENSG00000176485.10 | PLA2G16  | 209.8872222 | 1.343082383 | 0.281845868  | 4.765308048 | 1.89E-06    | 7.66E-05    |
| ENSG00000112149.9  | CD83     | 1289.664583 | 1.341743218 | 0.180059566  | 7.451663067 | 9.22E-14    | 1.30E-11    |
| ENSG00000165548.10 | TMEM63C  | 87.37137037 | 1.341095195 | 0.414504502  | 3.235417681 | 0.001214649 | 0.019733914 |
| ENSG00000198933.9  | TBKBP1   | 773.0276084 | 1.340034522 | 0.30193906   | 4.438095965 | 9.08E-06    | 0.000303672 |
| ENSG00000151208.16 | DLG5     | 777.4047235 | 1.339829198 | 0.213644829  | 6.271292435 | 3.58E-10    | 2.90E-08    |
| ENSG00000141526.15 | SLC16A3  | 850.9451911 | 1.338250552 | 0.24873903   | 5.380138991 | 7.44E-08    | 4.25E-06    |
| ENSG00000196154.11 | S100A4   | 7338.763482 | 1.334616845 | 0.174983434  | 7.627103963 | 2.40E-14    | 3.69E-12    |
| ENSG00000156475.18 | PPP2R2B  | 542.6151454 | 1.329632078 | 0.17999217   | 7.387166222 | 1.50E-13    | 2.01E-11    |
| ENSG00000196169.14 | KIF19    | 166.3664407 | 1.327962705 | 0.371477743  | 3.57481095  | 0.000350481 | 0.007309971 |
| ENSG00000100097.11 | LGALS1   | 1014.41496  | 1.323577743 | 0.264257349  | 5.008669579 | 5.48E-07    | 2.60E-05    |
| ENSG00000232434.2  | C9orf172 | 302.5561198 | 1.323162936 | 0.318096039  | 4.159633483 | 3.19E-05    | 0.000929611 |
| ENSG00000189233.11 | NUGGC    | 265.4880093 | 1.31838084  | 0.290175865  | 4.543385579 | 5.54E-06    | 0.000196257 |
| ENSG00000223865.10 | HLA-DPB1 | 291.4544012 | 1.317451223 | 0.280929241  | 4.689619417 | 2.74E-06    | 0.000106742 |
| ENSG00000101400.5  | SNTA1    | 747.2127709 | 1.313686661 | 0.211800247  | 6.202479357 | 5.56E-10    | 4.36E-08    |
| ENSG00000204257.14 | HLA-DMA  | 72.73832351 | 1.310809937 | 0.427205058  | 3.068338994 | 0.002152523 | 0.031442209 |
| ENSG00000142634.12 | EFHD2    | 5781.531439 | 1.310149927 | 0.225662258  | 5.805799941 | 6.41E-09    | 4.33E-07    |
| ENSG00000135114.12 | OASL     | 1743.328612 | 1.305326269 | 0.199591189  | 6.539999471 | 6.15E-11    | 5.80E-09    |
| ENSG00000177191.2  | B3GNT8   | 69.30722325 | 1.294859819 | 0.396045774  | 3.269470109 | 0.001077491 | 0.017978557 |
| ENSG00000114541.14 | FRMD4B   | 1597.190509 | 1.290217608 | 0.174777631  | 7.382052265 | 1.56E-13    | 2.07E-11    |
| ENSG00000147889.17 | CDKN2A   | 141.8124764 | 1.288566601 | 0.272323402  | 4.731751269 | 2.23E-06    | 8.87E-05    |
| ENSG00000005379.15 | TSPOAP1  | 3895.1056   | 1.281498308 | 0.178025428  | 7.19840038  | 6.09E-13    | 7.40E-11    |
| ENSG00000127946.16 | HIP1     | 593.2684236 | 1.277320411 | 0.23395104   | 5.459776599 | 4.77E-08    | 2.82E-06    |
| ENSG00000155366.16 | RHOC     | 238.0242713 | 1.276021572 | 0.244800342  | 5.212499141 | 1.86E-07    | 9.82E-06    |
| ENSG00000160219.11 | GAB3     | 2169.845911 | 1.275688297 | 0.185199726  | 6.888175949 | 5.65E-12    | 6.36E-10    |
| ENSG00000140859.15 | KIFC3    | 87.4258795  | 1.27184589  | 0.37909273   | 3.354973042 | 0.000793727 | 0.014069779 |
| ENSG00000165030.3  | NFIL3    | 433.927739  | 1.269872587 | 0.199131307  | 6.377061472 | 1.81E-10    | 1.57E-08    |

|                    |          |             |             |             |             |             |             |
|--------------------|----------|-------------|-------------|-------------|-------------|-------------|-------------|
| ENSG00000060558.3  | GNA15    | 913.1756182 | 1.268040691 | 0.259528339 | 4.885943069 | 1.03E-06    | 4.52E-05    |
| ENSG00000126838.9  | PZP      | 167.6818489 | 1.267391635 | 0.410648754 | 3.086315547 | 0.002026536 | 0.030020308 |
| ENSG00000099985.3  | OSM      | 176.7240864 | 1.26660029  | 0.304564759 | 4.158722412 | 3.20E-05    | 0.000931706 |
| ENSG00000065361.14 | ERBB3    | 200.3652832 | 1.263992407 | 0.372843963 | 3.390137785 | 0.000698575 | 0.012746904 |
| ENSG00000196358.10 | NTNG2    | 381.0256162 | 1.258570867 | 0.202848171 | 6.204496997 | 5.49E-10    | 4.32E-08    |
| ENSG00000196914.8  | ARHGEF12 | 1948.037965 | 1.257739688 | 0.174601102 | 7.203503717 | 5.87E-13    | 7.18E-11    |
| ENSG00000151014.5  | NOCT     | 180.6791595 | 1.255071623 | 0.298969891 | 4.197986688 | 2.69E-05    | 0.00080673  |
| ENSG00000106089.11 | STX1A    | 597.2989354 | 1.254842691 | 0.31961969  | 3.92604939  | 8.64E-05    | 0.002217525 |
| ENSG00000143036.16 | SLC44A3  | 62.97434867 | 1.251584496 | 0.415048964 | 3.015510471 | 0.002565471 | 0.035850317 |
| ENSG00000182718.16 | ANXA2    | 5057.899698 | 1.247465386 | 0.14658692  | 8.510072987 | 1.74E-17    | 3.60E-15    |
| ENSG00000145819.15 | ARHGAP26 | 1382.818592 | 1.238203148 | 0.187225504 | 6.613432059 | 3.76E-11    | 3.68E-09    |
| ENSG00000136193.16 | SCRN1    | 470.9452042 | 1.236984298 | 0.185062033 | 6.684160307 | 2.32E-11    | 2.35E-09    |
| ENSG00000232810.3  | TNF      | 172.7790932 | 1.23519138  | 0.302933737 | 4.077430896 | 4.55E-05    | 0.001273133 |
| ENSG00000007402.11 | CACNA2D2 | 395.4725201 | 1.232978504 | 0.350026835 | 3.522525648 | 0.000427456 | 0.008667478 |
| ENSG00000174871.10 | CNIH2    | 132.3322314 | 1.23067798  | 0.308079335 | 3.994678773 | 6.48E-05    | 0.001739465 |
| ENSG00000170837.2  | GPR27    | 74.22170769 | 1.227207869 | 0.420809841 | 2.916300305 | 0.003542094 | 0.04604431  |
| ENSG00000166483.10 | WEE1     | 906.4537486 | 1.226014056 | 0.183353472 | 6.686614907 | 2.28E-11    | 2.34E-09    |
| ENSG00000049759.17 | NEDD4L   | 350.8915503 | 1.222778865 | 0.305734143 | 3.999484169 | 6.35E-05    | 0.001711427 |
| ENSG00000064201.15 | TSPAN32  | 574.6196989 | 1.220513811 | 0.298015306 | 4.095473578 | 4.21E-05    | 0.001189375 |
| ENSG00000132334.16 | PTPRE    | 3258.415593 | 1.215583371 | 0.234850202 | 5.17599458  | 2.27E-07    | 1.16E-05    |
| ENSG00000115594.11 | IL1R1    | 452.2356186 | 1.21382976  | 0.187536911 | 6.472484556 | 9.64E-11    | 8.93E-09    |
| ENSG00000142945.12 | KIF2C    | 82.94339083 | 1.209202688 | 0.370259931 | 3.265821076 | 0.001091472 | 0.018139636 |
| ENSG00000105963.13 | ADAP1    | 125.859947  | 1.206701748 | 0.311215889 | 3.877378339 | 0.000105588 | 0.002642697 |
| ENSG00000143507.17 | DUSP10   | 1932.100065 | 1.200800903 | 0.264293987 | 4.543428761 | 5.53E-06    | 0.000196257 |
| ENSG00000121964.14 | GTDC1    | 1248.552013 | 1.192635537 | 0.157484671 | 7.57302618  | 3.65E-14    | 5.51E-12    |
| ENSG00000104490.17 | NCALD    | 510.1413216 | 1.190568557 | 0.187562379 | 6.347587212 | 2.19E-10    | 1.86E-08    |
| ENSG00000069702.10 | TGFBR3   | 3689.743126 | 1.189892269 | 0.1503588   | 7.913685593 | 2.50E-15    | 4.15E-13    |
| ENSG00000186891.13 | TNFRSF18 | 935.4283405 | 1.188469804 | 0.291258271 | 4.080467141 | 4.49E-05    | 0.001262458 |
| ENSG00000119900.7  | OGFRL1   | 2407.775489 | 1.179788755 | 0.173607801 | 6.795712798 | 1.08E-11    | 1.17E-09    |
| ENSG00000137166.14 | FOXP4    | 980.5000829 | 1.179076489 | 0.257824463 | 4.573175383 | 4.80E-06    | 0.000172129 |
| ENSG00000161921.14 | CXCL16   | 380.4737524 | 1.173887029 | 0.289254709 | 4.058316057 | 4.94E-05    | 0.001361011 |
| ENSG00000118503.14 | TNFAIP3  | 91589.25973 | 1.173523282 | 0.172639843 | 6.797522872 | 1.06E-11    | 1.17E-09    |
| ENSG00000118156.12 | ZNF541   | 184.2072441 | 1.166120221 | 0.351910683 | 3.313682354 | 0.00092076  | 0.015787558 |
| ENSG00000117411.16 | B4GALT2  | 118.1880969 | 1.158190395 | 0.330013559 | 3.509523665 | 0.00044891  | 0.008983023 |
| ENSG00000148175.12 | STOM     | 6523.987964 | 1.157766865 | 0.193260068 | 5.990719535 | 2.09E-09    | 1.50E-07    |
| ENSG00000160183.13 | TMPRSS3  | 238.5381299 | 1.154827657 | 0.263182137 | 4.387940873 | 1.14E-05    | 0.000374046 |
| ENSG00000188677.14 | PARVB    | 134.9840981 | 1.15276103  | 0.30374747  | 3.795129656 | 0.000147566 | 0.003540114 |
| ENSG00000076356.6  | PLXNA2   | 189.2860539 | 1.151375001 | 0.26407553  | 4.360021547 | 1.30E-05    | 0.000419385 |
| ENSG00000184730.10 | APOBR    | 1904.863467 | 1.148435192 | 0.220488533 | 5.208593729 | 1.90E-07    | 9.97E-06    |
| ENSG00000140564.10 | FURIN    | 11861.24502 | 1.147095995 | 0.26056287  | 4.40237704  | 1.07E-05    | 0.000353441 |
| ENSG00000144824.19 | PHLDB2   | 436.4304423 | 1.147069357 | 0.272304663 | 4.212448454 | 2.53E-05    | 0.000764646 |
| ENSG00000020633.18 | RUNX3    | 17744.88264 | 1.146131006 | 0.231461109 | 4.951721751 | 7.36E-07    | 3.35E-05    |
| ENSG00000166900.15 | STX3     | 625.4704619 | 1.144563272 | 0.252483213 | 4.533225227 | 5.81E-06    | 0.000202517 |
| ENSG00000105329.9  | TGFB1    | 12773.56958 | 1.142508819 | 0.232048595 | 4.92357567  | 8.50E-07    | 3.83E-05    |
| ENSG00000175274.18 | TP53I11  | 249.801151  | 1.135814838 | 0.331244233 | 3.428934675 | 0.000605955 | 0.011366069 |
| ENSG00000171368.11 | TPPP     | 763.3763833 | 1.1284572   | 0.277119205 | 4.072100309 | 4.66E-05    | 0.001297818 |
| ENSG00000213719.8  | CLIC1    | 2609.687761 | 1.12766118  | 0.137901752 | 8.177279544 | 2.90E-16    | 5.29E-14    |
| ENSG00000135842.16 | FAM129A  | 7834.982179 | 1.127570793 | 0.176039059 | 6.405230743 | 1.50E-10    | 1.33E-08    |

|                    |           |             |             |             |             |             |             |
|--------------------|-----------|-------------|-------------|-------------|-------------|-------------|-------------|
| ENSG00000127561.14 | SYNGR3    | 154.1767595 | 1.127302953 | 0.325616696 | 3.462055128 | 0.000536067 | 0.010308845 |
| ENSG00000178607.15 | ERN1      | 21471.68703 | 1.120960319 | 0.126759684 | 8.84319279  | 9.30E-19    | 2.26E-16    |
| ENSG00000168268.10 | NT5DC2    | 196.094145  | 1.118534783 | 0.298172604 | 3.751299645 | 0.00017592  | 0.004120122 |
| ENSG00000165029.15 | ABCA1     | 1448.143076 | 1.107632352 | 0.302822194 | 3.657698724 | 0.00025449  | 0.005644896 |
| ENSG00000128309.16 | MPST      | 225.3030117 | 1.106741779 | 0.26412678  | 4.190191463 | 2.79E-05    | 0.000828612 |
| ENSG00000134684.10 | YARS      | 4895.606311 | 1.102963278 | 0.160341519 | 6.878837641 | 6.03E-12    | 6.75E-10    |
| ENSG00000110880.10 | CORO1C    | 325.3066324 | 1.099434119 | 0.232427628 | 4.730221321 | 2.24E-06    | 8.91E-05    |
| ENSG00000187583.10 | PLEKHN1   | 219.7004265 | 1.096367996 | 0.327146298 | 3.35130797  | 0.000804308 | 0.014182377 |
| ENSG00000146858.7  | ZC3HAV1L  | 379.2069057 | 1.096146545 | 0.23078026  | 4.749741352 | 2.04E-06    | 8.17E-05    |
| ENSG00000127951.6  | FGL2      | 368.7028205 | 1.093771    | 0.277279885 | 3.944646047 | 7.99E-05    | 0.002090708 |
| ENSG00000070182.18 | SPTB      | 83.06840256 | 1.088198422 | 0.367952037 | 2.957446385 | 0.003101987 | 0.041647092 |
| ENSG00000122694.15 | GLIPR2    | 1731.63531  | 1.085485773 | 0.146511487 | 7.408878275 | 1.27E-13    | 1.75E-11    |
| ENSG00000167094.15 | TTC16     | 199.6171235 | 1.078479754 | 0.265077414 | 4.068546378 | 4.73E-05    | 0.001315584 |
| ENSG00000133808.4  | MICALCL   | 94.30373726 | 1.075741929 | 0.331104139 | 3.248953429 | 0.001158304 | 0.019005486 |
| ENSG00000198113.2  | TOR4A     | 203.4872027 | 1.072906277 | 0.281691245 | 3.808802359 | 0.000139642 | 0.003369279 |
| ENSG00000143013.12 | LMO4      | 1295.720676 | 1.072177554 | 0.204938453 | 5.231705131 | 1.68E-07    | 8.94E-06    |
| ENSG00000106799.12 | TGFR1     | 1770.089239 | 1.071867779 | 0.204485789 | 5.241771488 | 1.59E-07    | 8.54E-06    |
| ENSG00000118242.15 | MREG      | 344.3872065 | 1.071361431 | 0.198623917 | 5.393919569 | 6.89E-08    | 3.95E-06    |
| ENSG00000171867.16 | PRNP      | 5979.978634 | 1.067448612 | 0.169803309 | 6.286382875 | 3.25E-10    | 2.66E-08    |
| ENSG00000107331.16 | ABCA2     | 11135.04909 | 1.067324956 | 0.230146149 | 4.637596419 | 3.52E-06    | 0.000132529 |
| ENSG00000042493.15 | CAPG      | 643.1260428 | 1.067135935 | 0.320125058 | 3.333497047 | 0.000857616 | 0.014964994 |
| ENSG00000117016.9  | RIMS3     | 355.2772064 | 1.066920053 | 0.204351269 | 5.221010165 | 1.78E-07    | 9.41E-06    |
| ENSG00000162711.16 | NLRP3     | 610.4974265 | 1.066689143 | 0.247980426 | 4.301505412 | 1.70E-05    | 0.000538773 |
| ENSG00000104368.17 | PLAT      | 146.2276173 | 1.060628265 | 0.326693219 | 3.246557335 | 0.001168099 | 0.019128765 |
| ENSG00000130402.11 | ACTN4     | 6605.427698 | 1.059414719 | 0.201877465 | 5.247810689 | 1.54E-07    | 8.30E-06    |
| ENSG00000162676.11 | GFI1      | 686.6863092 | 1.057924089 | 0.182817574 | 5.786774565 | 7.18E-09    | 4.81E-07    |
| ENSG00000173482.16 | PTPRM     | 2546.863206 | 1.057107089 | 0.228703053 | 4.622181801 | 3.80E-06    | 0.000140876 |
| ENSG00000108798.8  | ABI3      | 319.8542665 | 1.050903711 | 0.235941146 | 4.454092595 | 8.42E-06    | 0.000282553 |
| ENSG00000188211.8  | NCR3LG1   | 452.6161617 | 1.038230737 | 0.224514864 | 4.624329629 | 3.76E-06    | 0.000139734 |
| ENSG00000213722.8  | DDAH2     | 167.6877245 | 1.036446414 | 0.268029265 | 3.866915109 | 0.000110221 | 0.002746348 |
| ENSG00000105656.12 | ELL       | 2349.034514 | 1.032813779 | 0.240897965 | 4.287349541 | 1.81E-05    | 0.00056726  |
| ENSG00000008516.16 | MMP25     | 286.7041193 | 1.031455881 | 0.316426114 | 3.259705305 | 0.00111528  | 0.01844392  |
| ENSG00000163171.7  | CDC42EP3  | 3637.397919 | 1.024636885 | 0.184883166 | 5.542077764 | 2.99E-08    | 1.85E-06    |
| ENSG00000135631.16 | RAB11FIP5 | 1169.124402 | 1.023157448 | 0.291836227 | 3.505930222 | 0.000455014 | 0.009072697 |
| ENSG00000163820.14 | FYCO1     | 5430.519627 | 1.022685542 | 0.166899548 | 6.127551282 | 8.92E-10    | 6.77E-08    |
| ENSG00000021762.19 | OSBPL5    | 316.9415646 | 1.017576138 | 0.324422604 | 3.136575952 | 0.001709332 | 0.026176969 |
| ENSG00000225556.1  | C2CD4D    | 329.4827597 | 1.010619514 | 0.256307331 | 3.942998861 | 8.05E-05    | 0.002098577 |
| ENSG00000121621.6  | KIF18A    | 83.95724872 | 1.008569871 | 0.340053379 | 2.965916331 | 0.003017826 | 0.04068     |
| ENSG00000179820.15 | MYADM     | 7626.31446  | 1.007613463 | 0.240560321 | 4.188610408 | 2.81E-05    | 0.000828612 |
| ENSG00000179588.8  | ZFPM1     | 935.34211   | 1.006873659 | 0.278800067 | 3.611454143 | 0.000304485 | 0.006546036 |
| ENSG00000186350.9  | RXRA      | 704.9878395 | 1.006780078 | 0.241262805 | 4.172960176 | 3.01E-05    | 0.000879912 |
| ENSG00000167851.13 | CD300A    | 486.3964026 | 1.003236809 | 0.296469787 | 3.38394283  | 0.000714529 | 0.012995589 |
| ENSG00000140030.5  | GPR65     | 1627.573598 | 1.001183645 | 0.156142955 | 6.411968074 | 1.44E-10    | 1.28E-08    |
| ENSG00000105281.12 | SLC1A5    | 543.6033882 | 1.000952657 | 0.215101995 | 4.65338622  | 3.27E-06    | 0.000123881 |

**Table S4 B: down-regulated genes in circulating pTh17-cells as compared to cTh17-cells**

| Gene_id            | Gene_name | baseMean    | log2FoldChange | lfcSE       | stat         | pvalue      | padj        |
|--------------------|-----------|-------------|----------------|-------------|--------------|-------------|-------------|
| ENSG00000173597.8  | SULT1B1   | 520.0399923 | -4.465363078   | 0.33169823  | -13.46212514 | 2.61E-41    | 2.92E-38    |
| ENSG00000143167.11 | GPA33     | 513.1665569 | -4.391407372   | 0.29913207  | -14.6804967  | 8.60E-49    | 1.31E-45    |
| ENSG00000227051.6  | C14orf132 | 374.9876431 | -4.215826604   | 0.275947058 | -15.27766464 | 1.08E-52    | 2.01E-49    |
| ENSG00000151490.13 | PTPRO     | 111.6849879 | -4.163361996   | 0.526548365 | -7.906893786 | 2.64E-15    | 4.34E-13    |
| ENSG00000092096.15 | SLC22A17  | 77.48656333 | -3.293067522   | 0.414669711 | -7.941422851 | 2.00E-15    | 3.39E-13    |
| ENSG00000072110.13 | ACTN1     | 1029.499259 | -3.200674416   | 1.055526749 | -3.03230062  | 0.002426974 | 0.034548321 |
| ENSG00000204219.9  | TCEA3     | 142.7670567 | -3.182302703   | 0.342706414 | -9.285798507 | 1.60E-20    | 4.64E-18    |
| ENSG00000101230.5  | ISM1      | 100.1487906 | -3.02451016    | 0.429513311 | -7.041714622 | 1.90E-12    | 2.20E-10    |
| ENSG00000278195.1  | SSTR3     | 279.5758432 | -2.930346498   | 0.341743142 | -8.574704614 | 9.93E-18    | 2.22E-15    |
| ENSG00000151914.19 | DST       | 456.5566125 | -2.784869617   | 0.276458927 | -10.07335754 | 7.25E-24    | 2.70E-21    |
| ENSG00000174175.16 | SELP      | 80.32344489 | -2.708460688   | 0.368367951 | -7.352595907 | 1.94E-13    | 2.57E-11    |
| ENSG00000185272.13 | RBM11     | 82.0700817  | -2.664005368   | 0.423167768 | -6.295388188 | 3.07E-10    | 2.53E-08    |
| ENSG00000149970.14 | CNKSR2    | 89.24630049 | -2.6348036     | 0.413783503 | -6.367589769 | 1.92E-10    | 1.66E-08    |
| ENSG00000182463.15 | TSHZ2     | 1481.937049 | -2.571226772   | 0.490560056 | -5.241410789 | 1.59E-07    | 8.54E-06    |
| ENSG00000182983.14 | ZNF662    | 35.97718716 | -2.563947793   | 0.549170492 | -4.668764678 | 3.03E-06    | 0.000116543 |
| ENSG00000261115.5  | TMEM178B  | 64.6247507  | -2.563551796   | 0.46337082  | -5.532397998 | 3.16E-08    | 1.93E-06    |
| ENSG00000176928.5  | GCNT4     | 1020.834855 | -2.550136751   | 0.187463135 | -13.60340392 | 3.82E-42    | 4.58E-39    |
| ENSG00000182272.11 | B4GALNT4  | 49.33080728 | -2.523738435   | 0.522451075 | -4.83057372  | 1.36E-06    | 5.74E-05    |
| ENSG00000181847.11 | TIGIT     | 1624.172626 | -2.519945676   | 0.4905201   | -5.137293408 | 2.79E-07    | 1.40E-05    |
| ENSG00000111863.12 | ADTRP     | 571.2675413 | -2.50177418    | 0.237127954 | -10.55031318 | 5.06E-26    | 2.50E-23    |
| ENSG00000106624.9  | AEBP1     | 100.5741292 | -2.459452861   | 0.409342697 | -6.008297886 | 1.87E-09    | 1.35E-07    |
| ENSG00000181690.7  | PLAG1     | 564.1155657 | -2.445662598   | 0.201627818 | -12.1295892  | 7.36E-34    | 6.17E-31    |
| ENSG00000112874.9  | NUDT12    | 85.47700414 | -2.439760449   | 0.356481597 | -6.84400111  | 7.70E-12    | 8.50E-10    |
| ENSG00000047634.14 | SCML1     | 1123.354197 | -2.424419952   | 0.231494715 | -10.47289549 | 1.15E-25    | 5.22E-23    |
| ENSG00000188404.8  | SELL      | 11285.69113 | -2.423001621   | 0.161293074 | -15.02235383 | 5.24E-51    | 8.79E-48    |
| ENSG00000166681.13 | BEX3      | 302.8058138 | -2.370843025   | 0.366845064 | -6.462791123 | 1.03E-10    | 9.37E-09    |
| ENSG00000070018.8  | LRP6      | 43.18907466 | -2.36378255    | 0.483233436 | -4.891595606 | 1.00E-06    | 4.40E-05    |
| ENSG00000153291.15 | SLC25A27  | 44.28083423 | -2.318910248   | 0.48815954  | -4.750312266 | 2.03E-06    | 8.17E-05    |
| ENSG00000110777.11 | POU2AF1   | 37.83157587 | -2.316584669   | 0.539516702 | -4.293814555 | 1.76E-05    | 0.000554383 |
| ENSG00000262655.3  | SPON1     | 2920.81319  | -2.247034001   | 0.266849272 | -8.420611326 | 3.75E-17    | 7.48E-15    |
| ENSG00000135678.11 | CPM       | 44.75821404 | -2.214519026   | 0.509721846 | -4.344563695 | 1.40E-05    | 0.000446595 |
| ENSG00000277586.1  | NEFL      | 295.238734  | -2.21003859    | 0.27382547  | -8.070975256 | 6.97E-16    | 1.23E-13    |
| ENSG00000188266.13 | HYKK      | 74.53812492 | -2.207539326   | 0.387140565 | -5.702164862 | 1.18E-08    | 7.66E-07    |
| ENSG00000177425.10 | PAWR      | 126.728969  | -2.146310851   | 0.342912983 | -6.259053923 | 3.87E-10    | 3.12E-08    |
| ENSG00000116191.17 | RALGPS2   | 573.6617119 | -2.145971388   | 0.210509219 | -10.19419194 | 2.10E-24    | 8.61E-22    |
| ENSG00000143869.6  | GDF7      | 160.7686076 | -2.143924926   | 0.436769668 | -4.908593896 | 9.17E-07    | 4.08E-05    |
| ENSG00000116690.12 | PRG4      | 85.50999847 | -2.104528667   | 0.394817416 | -5.330384589 | 9.80E-08    | 5.50E-06    |
| ENSG00000133138.19 | TBC1D8B   | 97.54184192 | -2.103289742   | 0.525488433 | -4.002542417 | 6.27E-05    | 0.001694898 |
| ENSG00000119771.14 | KLHL29    | 76.22523812 | -2.080540325   | 0.389322921 | -5.343996497 | 9.09E-08    | 5.12E-06    |
| ENSG00000034053.14 | APBA2     | 857.9366837 | -2.074617649   | 0.244834557 | -8.473549129 | 2.38E-17    | 4.87E-15    |
| ENSG00000129422.14 | MTUS1     | 131.803947  | -2.018492121   | 0.301545641 | -6.693819606 | 2.17E-11    | 2.26E-09    |
| ENSG00000172915.18 | NBEA      | 283.8993486 | -2.008322198   | 0.387903232 | -5.177379395 | 2.25E-07    | 1.15E-05    |
| ENSG00000187554.11 | TLR5      | 54.22839002 | -1.94593005    | 0.453227093 | -4.29349895  | 1.76E-05    | 0.000554383 |
| ENSG00000100116.16 | GCAT      | 37.05099803 | -1.938180632   | 0.540262699 | -3.587478157 | 0.000333892 | 0.007033957 |
| ENSG00000113645.14 | WWC1      | 82.85720452 | -1.925630384   | 0.429662457 | -4.481728282 | 7.40E-06    | 0.000252356 |
| ENSG00000008441.16 | NFIX      | 73.17212674 | -1.924915392   | 0.392033323 | -4.910081057 | 9.10E-07    | 4.06E-05    |
| ENSG00000174837.14 | ADGRE1    | 330.2810682 | -1.892767428   | 0.22115189  | -8.558676245 | 1.14E-17    | 2.42E-15    |



|                    |          |             |              |             |              |             |             |
|--------------------|----------|-------------|--------------|-------------|--------------|-------------|-------------|
| ENSG00000123454.10 | DBH      | 180.67704   | -1.865609415 | 0.385392475 | -4.84080395  | 1.29E-06    | 5.49E-05    |
| ENSG00000184557.4  | SOCS3    | 4955.429035 | -1.850844776 | 0.49592955  | -3.732071981 | 0.000189911 | 0.004392581 |
| ENSG00000163864.15 | NMNAT3   | 61.99691478 | -1.848085514 | 0.509877354 | -3.624568732 | 0.000289444 | 0.00630349  |
| ENSG00000139193.3  | CD27     | 577.1332149 | -1.809471399 | 0.20317414  | -8.906012359 | 5.29E-19    | 1.32E-16    |
| ENSG00000151715.7  | TMEM45B  | 1222.392061 | -1.791134468 | 0.179256607 | -9.992013647 | 1.65E-23    | 5.89E-21    |
| ENSG00000197880.8  | MDS2     | 72.73903243 | -1.768085553 | 0.389333279 | -4.541316262 | 5.59E-06    | 0.000197749 |
| ENSG00000106688.11 | SLC1A1   | 93.14160605 | -1.764918268 | 0.480318168 | -3.674477433 | 0.000238337 | 0.005350292 |
| ENSG00000160856.20 | FCRL3    | 34.25045381 | -1.756988236 | 0.543703013 | -3.231521979 | 0.001231329 | 0.019930645 |
| ENSG00000151320.10 | AKAP6    | 35.84651078 | -1.737173653 | 0.5260724   | -3.302156991 | 0.000959444 | 0.016350517 |
| ENSG00000164649.19 | CDC47L   | 102.3262082 | -1.730270781 | 0.381565875 | -4.534658091 | 5.77E-06    | 0.000201987 |
| ENSG00000138795.9  | LEF1     | 5361.693124 | -1.719862044 | 0.178471784 | -9.636604776 | 5.60E-22    | 1.81E-19    |
| ENSG00000242866.9  | STRC     | 33.63503683 | -1.71372863  | 0.526411212 | -3.255494164 | 0.001131952 | 0.018646078 |
| ENSG00000173809.16 | TDRD12   | 91.6927496  | -1.678291395 | 0.364409921 | -4.605504123 | 4.11E-06    | 0.000151314 |
| ENSG00000215475.4  | SIAH3    | 96.63536445 | -1.677985358 | 0.369662809 | -4.539232292 | 5.65E-06    | 0.000198901 |
| ENSG00000003147.17 | ICA1     | 54.12784079 | -1.673916977 | 0.466733745 | -3.586449433 | 0.000335211 | 0.007052891 |
| ENSG00000114948.12 | ADAM23   | 1773.927696 | -1.670141216 | 0.233248198 | -7.160360625 | 8.05E-13    | 9.64E-11    |
| ENSG00000163359.15 | COL6A3   | 103.4823918 | -1.669579339 | 0.449252684 | -3.716348054 | 0.000202123 | 0.004630331 |
| ENSG00000123453.17 | SARDH    | 332.5922936 | -1.655586631 | 0.3690244   | -4.486387973 | 7.24E-06    | 0.00024791  |
| ENSG00000072163.19 | LIMS2    | 60.99714385 | -1.652179915 | 0.50936441  | -3.243610824 | 0.001180249 | 0.019271269 |
| ENSG00000117322.16 | CR2      | 258.8376466 | -1.647479591 | 0.377506635 | -4.36410764  | 1.28E-05    | 0.000413213 |
| ENSG00000105173.13 | CCNE1    | 98.86872412 | -1.643334635 | 0.340780547 | -4.822266552 | 1.42E-06    | 5.92E-05    |
| ENSG00000140470.13 | ADAMTS17 | 124.7741135 | -1.617319924 | 0.353130526 | -4.579949354 | 4.65E-06    | 0.000167362 |
| ENSG00000197093.10 | GAL3ST4  | 169.8938412 | -1.593725613 | 0.300466083 | -5.304178087 | 1.13E-07    | 6.28E-06    |
| ENSG00000174500.12 | GCSAM    | 455.4838218 | -1.574312621 | 0.190942875 | -8.24494038  | 1.65E-16    | 3.05E-14    |
| ENSG00000109321.10 | AREG     | 133.286477  | -1.570832632 | 0.369018416 | -4.256786558 | 2.07E-05    | 0.000644011 |
| ENSG00000149212.11 | SESN3    | 6382.484112 | -1.566442178 | 0.209141529 | -7.489866739 | 6.89E-14    | 1.01E-11    |
| ENSG00000154027.18 | AK5      | 152.6344631 | -1.565512187 | 0.3006621   | -5.206882375 | 1.92E-07    | 1.00E-05    |
| ENSG00000187079.15 | TEAD1    | 39.69456449 | -1.561813954 | 0.477184018 | -3.272980434 | 0.001064198 | 0.017774446 |
| ENSG00000156299.13 | TIAM1    | 2279.19684  | -1.555470776 | 0.471255231 | -3.300697101 | 0.000964449 | 0.016402487 |
| ENSG00000055732.12 | MCOLN3   | 176.5494706 | -1.545172342 | 0.309449586 | -4.993292648 | 5.94E-07    | 2.78E-05    |
| ENSG00000151491.12 | EPS8     | 76.45906601 | -1.525968504 | 0.412343913 | -3.700717905 | 0.00021499  | 0.004898334 |
| ENSG00000140443.13 | IGF1R    | 969.1620825 | -1.525822124 | 0.197393769 | -7.729839346 | 1.08E-14    | 1.67E-12    |
| ENSG00000138449.10 | SLC40A1  | 910.6404529 | -1.518764537 | 0.224527544 | -6.764268258 | 1.34E-11    | 1.44E-09    |
| ENSG00000223547.9  | ZNF844   | 305.1312072 | -1.517317148 | 0.280420543 | -5.410863033 | 6.27E-08    | 3.65E-06    |
| ENSG00000198520.10 | C1orf228 | 701.3485108 | -1.4764343   | 0.223102421 | -6.617742183 | 3.65E-11    | 3.60E-09    |
| ENSG00000120915.13 | EPHX2    | 975.0901822 | -1.476335867 | 0.185722409 | -7.949153114 | 1.88E-15    | 3.21E-13    |
| ENSG00000113231.13 | PDE8B    | 54.9278645  | -1.469566847 | 0.431490018 | -3.405795696 | 0.000659715 | 0.012170259 |
| ENSG00000082781.11 | ITGB5    | 46.35325134 | -1.468518312 | 0.503086757 | -2.919016038 | 0.003511382 | 0.045751638 |
| ENSG00000166105.15 | GLB1L3   | 331.9827682 | -1.465573199 | 0.248901594 | -5.888163176 | 3.91E-09    | 2.68E-07    |
| ENSG00000198939.7  | ZFP2     | 73.09226834 | -1.4602555   | 0.395195497 | -3.695020597 | 0.000219869 | 0.004975685 |
| ENSG00000120896.13 | SORBS3   | 2460.743765 | -1.457553298 | 0.221161222 | -6.590455985 | 4.38E-11    | 4.21E-09    |
| ENSG00000154227.13 | CERS3    | 48.64563003 | -1.445988865 | 0.484306861 | -2.985687342 | 0.002829418 | 0.038480539 |
| ENSG00000126353.3  | CCR7     | 7259.365634 | -1.434704783 | 0.214386678 | -6.692135883 | 2.20E-11    | 2.27E-09    |
| ENSG00000114529.12 | C3orf52  | 116.3269258 | -1.42736201  | 0.293845655 | -4.857522948 | 1.19E-06    | 5.14E-05    |
| ENSG00000112303.13 | VNN2     | 177.1418773 | -1.421048751 | 0.374708479 | -3.792411515 | 0.000149191 | 0.003573987 |
| ENSG00000166405.14 | RIC3     | 1175.513417 | -1.415524156 | 0.164449882 | -8.60763253  | 7.46E-18    | 1.76E-15    |
| ENSG00000113749.7  | HRH2     | 101.828989  | -1.415417379 | 0.480330624 | -2.946756479 | 0.00321126  | 0.042805737 |
| ENSG00000126217.20 | MCF2L    | 640.9428502 | -1.414790688 | 0.277127622 | -5.1051955   | 3.30E-07    | 1.63E-05    |
| ENSG00000172292.14 | CERS6    | 325.965882  | -1.414175871 | 0.213208576 | -6.632828258 | 3.29E-11    | 3.27E-09    |

|                    |          |             |              |             |              |             |             |
|--------------------|----------|-------------|--------------|-------------|--------------|-------------|-------------|
| ENSG00000156510.12 | HKDC1    | 165.2783966 | -1.402629795 | 0.283728784 | -4.943558328 | 7.67E-07    | 3.49E-05    |
| ENSG00000186310.9  | NAP1L3   | 297.3529222 | -1.395809431 | 0.251344628 | -5.55336886  | 2.80E-08    | 1.75E-06    |
| ENSG00000165568.17 | AKR1E2   | 87.90175089 | -1.393689517 | 0.332722204 | -4.18874815  | 2.80E-05    | 0.000828612 |
| ENSG00000151846.8  | PABPC3   | 304.6076233 | -1.385987991 | 0.286821362 | -4.832234193 | 1.35E-06    | 5.70E-05    |
| ENSG00000155970.11 | MICU3    | 283.7135984 | -1.385058443 | 0.218886907 | -6.327735466 | 2.49E-10    | 2.10E-08    |
| ENSG00000117318.8  | ID3      | 64.52657382 | -1.380411215 | 0.470831485 | -2.931858339 | 0.003369404 | 0.044349714 |
| ENSG00000167889.12 | MGAT5B   | 441.7757808 | -1.380222291 | 0.243629702 | -5.665246396 | 1.47E-08    | 9.36E-07    |
| ENSG00000178732.5  | GP5      | 117.7859836 | -1.375423696 | 0.301365028 | -4.563979119 | 5.02E-06    | 0.000179082 |
| ENSG00000213420.7  | GPC2     | 154.4285191 | -1.37447208  | 0.29210669  | -4.705376934 | 2.53E-06    | 9.97E-05    |
| ENSG00000151376.16 | ME3      | 65.17255135 | -1.367707125 | 0.449390269 | -3.043472944 | 0.002338645 | 0.033347562 |
| ENSG00000274349.4  | ZNF658   | 160.9252215 | -1.365927865 | 0.345158513 | -3.957392947 | 7.58E-05    | 0.001994701 |
| ENSG00000171502.14 | COL24A1  | 109.0789964 | -1.354855677 | 0.451473838 | -3.000961656 | 0.002691285 | 0.037174753 |
| ENSG00000109654.14 | TRIM2    | 286.6582625 | -1.342732142 | 0.366199336 | -3.666670066 | 0.00024573  | 0.005489074 |
| ENSG00000165591.6  | FAAH2    | 773.0899176 | -1.332946892 | 0.178766856 | -7.456342404 | 8.90E-14    | 1.26E-11    |
| ENSG00000102098.17 | SCML2    | 52.72400677 | -1.320741451 | 0.431994617 | -3.057309976 | 0.002233332 | 0.032285123 |
| ENSG00000164904.16 | ALDH7A1  | 59.96371203 | -1.315532945 | 0.42201855  | -3.117239621 | 0.001825531 | 0.027504343 |
| ENSG00000055118.14 | KCNH2    | 100.4563048 | -1.314168911 | 0.375936229 | -3.495722973 | 0.000472779 | 0.0093712   |
| ENSG00000171291.8  | ZNF439   | 630.7150077 | -1.31025404  | 0.242006929 | -5.414117885 | 6.16E-08    | 3.60E-06    |
| ENSG00000107104.18 | KANK1    | 761.1191201 | -1.30588239  | 0.216005936 | -6.045585664 | 1.49E-09    | 1.10E-07    |
| ENSG00000196381.10 | ZNF781   | 130.6805967 | -1.302816631 | 0.327658557 | -3.976141025 | 7.00E-05    | 0.00186732  |
| ENSG00000073331.17 | ALPK1    | 1435.742555 | -1.297619866 | 0.182495575 | -7.11041823  | 1.16E-12    | 1.37E-10    |
| ENSG00000143502.14 | SUSD4    | 122.592248  | -1.287307481 | 0.31449912  | -4.093198998 | 4.25E-05    | 0.001199089 |
| ENSG00000136153.19 | LMO7     | 713.3367079 | -1.287189329 | 0.189423691 | -6.795292206 | 1.08E-11    | 1.17E-09    |
| ENSG00000179088.14 | C12orf42 | 116.4427075 | -1.277462909 | 0.406526988 | -3.142381554 | 0.001675795 | 0.025781107 |
| ENSG00000189060.5  | H1FO     | 131.94254   | -1.276029805 | 0.371283667 | -3.43680565  | 0.000588618 | 0.011131624 |
| ENSG00000164684.13 | ZNF704   | 309.3018519 | -1.268861599 | 0.361898982 | -3.506120942 | 0.000454689 | 0.009072697 |
| ENSG00000102678.6  | FGF9     | 274.6431829 | -1.256429497 | 0.325529405 | -3.859649787 | 0.00011355  | 0.002816737 |
| ENSG00000136111.12 | TBC1D4   | 8105.325607 | -1.239642362 | 0.18808171  | -6.590977725 | 4.37E-11    | 4.21E-09    |
| ENSG00000171105.13 | INSR     | 59.95328719 | -1.236314492 | 0.410440671 | -3.012163704 | 0.002593927 | 0.036187651 |
| ENSG00000090975.12 | PITPNM2  | 767.7213439 | -1.234633699 | 0.25464638  | -4.848424305 | 1.24E-06    | 5.32E-05    |
| ENSG00000196724.12 | ZNF418   | 92.98164661 | -1.225388166 | 0.402611333 | -3.043600776 | 0.002337651 | 0.033347562 |
| ENSG00000173198.5  | CYSLTR1  | 851.2026939 | -1.224796699 | 0.263513736 | -4.647942523 | 3.35E-06    | 0.000126337 |
| ENSG00000164251.4  | F2RL1    | 201.063307  | -1.224207759 | 0.278654005 | -4.393289659 | 1.12E-05    | 0.000367104 |
| ENSG00000148429.14 | USP6NL   | 216.6855335 | -1.215230217 | 0.265266633 | -4.581165006 | 4.62E-06    | 0.000167127 |
| ENSG00000182871.14 | COL18A1  | 261.8092963 | -1.214529136 | 0.308780921 | -3.933303692 | 8.38E-05    | 0.002168228 |
| ENSG00000186265.9  | BTLA     | 534.0054288 | -1.214476132 | 0.181319146 | -6.69800272  | 2.11E-11    | 2.23E-09    |
| ENSG00000184867.13 | ARMCX2   | 93.33002126 | -1.21407966  | 0.373611084 | -3.249581486 | 0.00115575  | 0.018993755 |
| ENSG00000123191.14 | ATP7B    | 66.96659992 | -1.188332275 | 0.37452947  | -3.172867211 | 0.001509415 | 0.023523594 |
| ENSG00000173762.7  | CD7      | 2396.811807 | -1.185693602 | 0.286369081 | -4.140438619 | 3.47E-05    | 0.00099535  |
| ENSG00000167642.12 | SPINT2   | 473.922448  | -1.185677038 | 0.236810648 | -5.006856944 | 5.53E-07    | 2.61E-05    |
| ENSG00000038382.17 | TRIO     | 474.7017294 | -1.177547316 | 0.339627563 | -3.467172413 | 0.000525964 | 0.010172892 |
| ENSG00000142192.20 | APP      | 2043.310496 | -1.175982281 | 0.188135039 | -6.250735047 | 4.09E-10    | 3.28E-08    |
| ENSG00000176160.9  | HSF5     | 76.88086881 | -1.166973105 | 0.398438808 | -2.928864057 | 0.003402032 | 0.044660737 |
| ENSG00000165821.11 | SALL2    | 154.8024583 | -1.164067211 | 0.280510581 | -4.149815688 | 3.33E-05    | 0.000957079 |
| ENSG00000041515.15 | MYO16    | 194.3773456 | -1.150374163 | 0.314917055 | -3.652943349 | 0.000259251 | 0.00573534  |
| ENSG00000122378.13 | FAM213A  | 89.11567374 | -1.138032507 | 0.333385582 | -3.413562456 | 0.000641195 | 0.011880875 |
| ENSG00000170074.19 | FAM153A  | 1657.418744 | -1.129165003 | 0.168923801 | -6.684463609 | 2.32E-11    | 2.35E-09    |
| ENSG00000184635.13 | ZNF93    | 152.429942  | -1.121555092 | 0.26177306  | -4.284455745 | 1.83E-05    | 0.000573109 |
| ENSG00000135925.8  | WNT10A   | 215.0617397 | -1.118060318 | 0.370145068 | -3.020600337 | 0.002522741 | 0.03554945  |

|                    |               |             |              |             |              |             |             |
|--------------------|---------------|-------------|--------------|-------------|--------------|-------------|-------------|
| ENSG00000074966.10 | TXK           | 1371.033421 | -1.113624923 | 0.202887101 | -5.488889727 | 4.04E-08    | 2.43E-06    |
| ENSG00000137266.14 | SLC22A23      | 439.4436524 | -1.111121709 | 0.240218296 | -4.62546661  | 3.74E-06    | 0.000139588 |
| ENSG00000165028.11 | NIPSNAP3B     | 77.02110825 | -1.089293046 | 0.360230255 | -3.023879952 | 0.002495554 | 0.035366983 |
| ENSG00000132122.11 | SPATA6        | 91.09216636 | -1.086634523 | 0.369020014 | -2.944649296 | 0.003233209 | 0.043035474 |
| ENSG00000110002.15 | VWA5A         | 590.8549852 | -1.086029909 | 0.197372298 | -5.502443446 | 3.75E-08    | 2.27E-06    |
| ENSG00000163545.8  | NUAK2         | 456.8428468 | -1.082763727 | 0.190759735 | -5.676060144 | 1.38E-08    | 8.82E-07    |
| ENSG00000172005.10 | MAL           | 1795.556158 | -1.077037209 | 0.237580007 | -4.533366357 | 5.81E-06    | 0.000202517 |
| ENSG00000196411.9  | EPHB4         | 497.2592154 | -1.075776944 | 0.285933848 | -3.762328079 | 0.000168339 | 0.003970291 |
| ENSG00000049192.14 | ADAMTS6       | 132.282345  | -1.073463985 | 0.318744877 | -3.36778428  | 0.000757749 | 0.013569487 |
| ENSG00000124613.8  | ZNF391        | 140.5077345 | -1.069242106 | 0.324983221 | -3.290145575 | 0.001001356 | 0.01692715  |
| ENSG00000170293.8  | CMTM8         | 370.8620754 | -1.063525106 | 0.227441225 | -4.676043691 | 2.92E-06    | 0.000113263 |
| ENSG00000169047.5  | IRS1          | 632.1033033 | -1.061452224 | 0.238002036 | -4.459845146 | 8.20E-06    | 0.000276735 |
| ENSG00000164398.12 | ACSL6         | 1316.834025 | -1.06046329  | 0.185444487 | -5.718494559 | 1.07E-08    | 7.04E-07    |
| ENSG00000204677.10 | FAM153C       | 350.6226054 | -1.055916122 | 0.224081668 | -4.712193247 | 2.45E-06    | 9.67E-05    |
| ENSG00000131067.16 | GGT7          | 1537.315204 | -1.051775764 | 0.164874498 | -6.379250744 | 1.78E-10    | 1.55E-08    |
| ENSG00000176533.12 | GNG7          | 211.6078581 | -1.043166624 | 0.265803276 | -3.924581517 | 8.69E-05    | 0.002227678 |
| ENSG00000198734.10 | F5            | 1868.035158 | -1.039676544 | 0.269969853 | -3.85108387  | 0.000117596 | 0.002895699 |
| ENSG00000116983.12 | HPCAL4        | 2285.418369 | -1.035626331 | 0.154762884 | -6.691697017 | 2.21E-11    | 2.27E-09    |
| ENSG00000170209.4  | ANKK1         | 208.468426  | -1.028053063 | 0.243215348 | -4.226925123 | 2.37E-05    | 0.000722357 |
| ENSG00000166503.8  | RP11-382A20.3 | 257.5082798 | -1.027387183 | 0.331203298 | -3.101983554 | 0.001922286 | 0.028729786 |
| ENSG00000124243.17 | BCAS4         | 440.9134889 | -1.026783539 | 0.203448346 | -5.046900401 | 4.49E-07    | 2.16E-05    |
| ENSG00000203710.10 | CR1           | 1583.36894  | -1.02321081  | 0.188381322 | -5.431593741 | 5.59E-08    | 3.30E-06    |
| ENSG00000183087.14 | GAS6          | 659.5276889 | -1.020036091 | 0.196558501 | -5.189478385 | 2.11E-07    | 1.09E-05    |
| ENSG00000070756.14 | PABPC1        | 118951.6104 | -1.009835832 | 0.125932024 | -8.018896251 | 1.07E-15    | 1.86E-13    |
| ENSG00000187601.4  | MAGEH1        | 503.7120779 | -1.006536589 | 0.20230138  | -4.975431148 | 6.51E-07    | 3.02E-05    |

**Table S5 A: up-regulated genes in circulating pTh17-cells as compared to CCR5<sup>+</sup>Th1/17-cells**

| Gene_id            | Gene_name    | baseMean    | log2FoldChange | lfcSE       | stat        | pvalue      | padj        |
|--------------------|--------------|-------------|----------------|-------------|-------------|-------------|-------------|
| ENSG00000063438.16 | AHRR         | 407.548823  | 3.835433804    | 0.385916559 | 9.93850539  | 2.83E-23    | 2.48E-19    |
| ENSG00000186522.14 | SEPT10       | 156.9090299 | 3.544291811    | 0.530415952 | 6.682098826 | 2.36E-11    | 2.75E-08    |
| ENSG00000010319.6  | SEMA3G       | 47.96423605 | 3.329257529    | 0.779734579 | 4.269731802 | 1.96E-05    | 0.003535054 |
| ENSG00000137474.19 | MYO7A        | 154.3417016 | 3.191617094    | 0.924627223 | 3.451787936 | 0.000556885 | 0.044150163 |
| ENSG00000134489.6  | HRH4         | 337.2891653 | 3.14886706     | 0.671105784 | 4.692057697 | 2.70E-06    | 0.0006969   |
| ENSG00000198910.12 | L1CAM        | 86.23332104 | 2.907139039    | 0.500351384 | 5.810194854 | 6.24E-09    | 4.05E-06    |
| ENSG00000182463.15 | TSHZ2        | 1481.937049 | 2.832045178    | 0.507127752 | 5.584480764 | 2.34E-08    | 1.28E-05    |
| ENSG00000115594.11 | IL1R1        | 452.2356186 | 2.768990149    | 0.209738567 | 13.20210296 | 8.53E-40    | 1.49E-35    |
| ENSG00000005102.12 | MEOX1        | 94.19577069 | 2.593927852    | 0.587155074 | 4.417790065 | 9.97E-06    | 0.001941233 |
| ENSG00000183813.6  | CCR4         | 4545.900849 | 2.543463277    | 0.478348696 | 5.317174061 | 1.05E-07    | 4.20E-05    |
| ENSG00000167693.16 | NXN          | 57.4217863  | 2.440699607    | 0.522942416 | 4.667243531 | 3.05E-06    | 0.000753323 |
| ENSG00000154165.4  | GPR15        | 2338.208748 | 2.415995186    | 0.491140317 | 4.919154678 | 8.69E-07    | 0.000267176 |
| ENSG00000072163.19 | LIMS2        | 60.99714385 | 2.311659139    | 0.66279649  | 3.487735941 | 0.000487129 | 0.039883111 |
| ENSG00000129521.13 | EGLN3        | 357.1939043 | 2.307331324    | 0.267390307 | 8.62907616  | 6.18E-18    | 1.81E-14    |
| ENSG00000127318.10 | IL22         | 27.03548091 | 2.295380809    | 0.614469487 | 3.735548888 | 0.000187306 | 0.020640199 |
| ENSG00000277586.1  | NEFL         | 295.238734  | 2.256402665    | 0.346564312 | 6.510776177 | 7.48E-11    | 6.55E-08    |
| ENSG00000163492.14 | CCDC141      | 54.75146551 | 2.217572271    | 0.629668886 | 3.521806969 | 0.000428616 | 0.036812662 |
| ENSG00000281106.2  | RP11-327P2.7 | 62.25525272 | 2.203095245    | 0.523237969 | 4.210503399 | 2.55E-05    | 0.004376854 |
| ENSG00000164530.13 | PI16         | 494.802236  | 2.200560576    | 0.642498035 | 3.425007483 | 0.000614782 | 0.047129153 |
| ENSG00000049759.17 | NEDD4L       | 350.8915503 | 2.129575616    | 0.31626499  | 6.733516772 | 1.66E-11    | 2.23E-08    |
| ENSG00000104432.12 | IL7          | 102.9088109 | 2.109771117    | 0.39036002  | 5.404680318 | 6.49E-08    | 2.84E-05    |
| ENSG00000137942.16 | FNBP1L       | 137.6717349 | 2.076982026    | 0.368684128 | 5.633499968 | 1.77E-08    | 1.03E-05    |
| ENSG00000198846.5  | TOX          | 379.7074889 | 2.020405743    | 0.3526037   | 5.729961835 | 1.00E-08    | 6.07E-06    |
| ENSG00000106688.11 | SLC1A1       | 93.14160605 | 1.998098679    | 0.576165489 | 3.467924956 | 0.000524494 | 0.042348639 |
| ENSG00000156011.16 | PSD3         | 146.5566086 | 1.926551224    | 0.326931126 | 5.892835132 | 3.80E-09    | 2.68E-06    |
| ENSG00000198752.10 | CDC42BPB     | 797.2263541 | 1.920764709    | 0.521842182 | 3.680738692 | 0.000232559 | 0.024399224 |
| ENSG00000104427.11 | ZC2HC1A      | 438.4235252 | 1.865635417    | 0.23754167  | 7.853929023 | 4.03E-15    | 1.01E-11    |
| ENSG00000197646.7  | PDCD1LG2     | 108.0004515 | 1.85197232     | 0.405295309 | 4.569439316 | 4.89E-06    | 0.001084596 |
| ENSG00000156535.13 | CD109        | 63.42313459 | 1.849886172    | 0.521779963 | 3.545337698 | 0.00039211  | 0.03523162  |
| ENSG00000029153.14 | ARNTL2       | 53.026605   | 1.789545727    | 0.447390837 | 3.999960615 | 6.34E-05    | 0.009823083 |
| ENSG00000042493.15 | CAPG         | 643.1260428 | 1.761227901    | 0.323939121 | 5.43691017  | 5.42E-08    | 2.57E-05    |
| ENSG00000179388.8  | EGR3         | 81.78231338 | 1.749340372    | 0.446808091 | 3.91519403  | 9.03E-05    | 0.012561102 |
| ENSG00000076706.15 | MCAM         | 1068.806163 | 1.746076142    | 0.296352016 | 5.891898977 | 3.82E-09    | 2.68E-06    |
| ENSG00000198734.10 | F5           | 1868.035158 | 1.726739872    | 0.274429608 | 6.292104864 | 3.13E-10    | 2.61E-07    |
| ENSG00000144354.13 | CDCA7        | 652.1629881 | 1.697345504    | 0.313099507 | 5.421105641 | 5.92E-08    | 2.66E-05    |
| ENSG00000056736.9  | IL17RB       | 205.9077277 | 1.677124156    | 0.375720838 | 4.463750701 | 8.05E-06    | 0.001640806 |
| ENSG00000121594.11 | CD80         | 75.82923664 | 1.664676419    | 0.461140393 | 3.609912393 | 0.0003063   | 0.02931806  |
| ENSG00000181409.11 | AATK         | 139.6894047 | 1.655895962    | 0.322972668 | 5.127046727 | 2.94E-07    | 0.000101114 |
| ENSG00000070526.14 | ST6GALNAC1   | 345.0292808 | 1.598235077    | 0.291585427 | 5.48118982  | 4.22E-08    | 2.18E-05    |
| ENSG00000141447.16 | OSBPL1A      | 374.6036709 | 1.569193237    | 0.299249374 | 5.243764472 | 1.57E-07    | 5.87E-05    |
| ENSG00000170128.4  | GPR25        | 238.0086622 | 1.562143751    | 0.416844081 | 3.747549319 | 0.000178571 | 0.020056012 |
| ENSG00000176273.14 | SLC35G1      | 325.8388812 | 1.549761439    | 0.233331299 | 6.641892641 | 3.10E-11    | 3.39E-08    |
| ENSG00000108797.11 | CNTNAP1      | 382.5857475 | 1.535007295    | 0.327684804 | 4.68440183  | 2.81E-06    | 0.000712974 |
| ENSG00000227051.6  | C14orf132    | 374.9876431 | 1.505234674    | 0.419773558 | 3.585825371 | 0.000336014 | 0.031000759 |
| ENSG00000186827.10 | TNFRSF4      | 1070.600623 | 1.489066304    | 0.255841832 | 5.820261255 | 5.88E-09    | 3.96E-06    |

|                    |                |             |             |             |             |             |             |
|--------------------|----------------|-------------|-------------|-------------|-------------|-------------|-------------|
| ENSG00000196169.14 | KIF19          | 166.3664407 | 1.449485511 | 0.377664028 | 3.838029054 | 0.000124026 | 0.01561969  |
| ENSG00000173198.5  | CYSLTR1        | 851.2026939 | 1.408556078 | 0.273357479 | 5.152798762 | 2.57E-07    | 8.99E-05    |
| ENSG00000100097.11 | LGALS1         | 1014.41496  | 1.400529639 | 0.266236157 | 5.260478714 | 1.44E-07    | 5.47E-05    |
| ENSG00000075618.17 | FSCN1          | 215.9963815 | 1.358891677 | 0.357039046 | 3.806002989 | 0.000141231 | 0.016833352 |
| ENSG00000111961.17 | SASH1          | 264.0254696 | 1.357324741 | 0.254530987 | 5.332650285 | 9.68E-08    | 3.94E-05    |
| ENSG00000178732.5  | GP5            | 117.7859836 | 1.355574806 | 0.361454205 | 3.75033624  | 0.000176598 | 0.020056012 |
| ENSG00000189350.12 | FAM179A        | 288.3774294 | 1.348128429 | 0.355755462 | 3.789480619 | 0.000150963 | 0.017516659 |
| ENSG00000166002.6  | SMCO4          | 131.7291127 | 1.341254272 | 0.351621464 | 3.814483502 | 0.000136468 | 0.016377101 |
| ENSG00000182511.11 | FES            | 234.3770834 | 1.284095044 | 0.348687463 | 3.682653325 | 0.000230819 | 0.024362524 |
| ENSG00000132694.18 | ARHGEF11       | 1206.621609 | 1.282059107 | 0.232714192 | 5.509157367 | 3.61E-08    | 1.91E-05    |
| ENSG00000173040.12 | EVC2           | 272.9043705 | 1.276069801 | 0.372539863 | 3.425324181 | 0.000614066 | 0.047129153 |
| ENSG00000163629.12 | PTPN13         | 4806.598336 | 1.259953371 | 0.175027812 | 7.198589501 | 6.08E-13    | 1.07E-09    |
| ENSG00000147408.14 | CSGALNACT<br>1 | 4272.518491 | 1.255383687 | 0.163302694 | 7.687464637 | 1.50E-14    | 2.92E-11    |
| ENSG00000041515.15 | MYO16          | 194.3773456 | 1.253787752 | 0.35770666  | 3.505072428 | 0.000456483 | 0.038452116 |
| ENSG00000163599.14 | CTLA4          | 1900.413407 | 1.25236861  | 0.241742587 | 5.180587446 | 2.21E-07    | 8.01E-05    |
| ENSG00000160712.12 | IL6R           | 5562.244178 | 1.236839665 | 0.221461935 | 5.584886031 | 2.34E-08    | 1.28E-05    |
| ENSG00000053524.11 | MCF2L2         | 1048.344212 | 1.230537093 | 0.230476789 | 5.339093349 | 9.34E-08    | 3.90E-05    |
| ENSG00000182809.10 | CRIP2          | 455.9640259 | 1.229955638 | 0.358159343 | 3.434101785 | 0.000594521 | 0.046296004 |
| ENSG00000029534.19 | ANK1           | 1944.840944 | 1.218992141 | 0.181700576 | 6.708796248 | 1.96E-11    | 2.46E-08    |
| ENSG00000131747.14 | TOP2A          | 157.1100885 | 1.208736637 | 0.354284461 | 3.411768706 | 0.000645429 | 0.048743764 |
| ENSG00000163701.18 | IL17RE         | 376.1687526 | 1.203036845 | 0.283147481 | 4.248799386 | 2.15E-05    | 0.003787058 |
| ENSG00000137265.14 | IRF4           | 889.9146947 | 1.193782146 | 0.295349622 | 4.041928809 | 5.30E-05    | 0.00866298  |
| ENSG00000118263.14 | KLF7           | 1805.235081 | 1.172706628 | 0.238123604 | 4.924781107 | 8.45E-07    | 0.000264238 |
| ENSG00000174136.11 | RGMB           | 257.4178432 | 1.146134658 | 0.316611478 | 3.620003492 | 0.000294599 | 0.028675943 |
| ENSG00000155970.11 | MICU3          | 283.7135984 | 1.122577173 | 0.249445041 | 4.500298613 | 6.79E-06    | 0.001415406 |
| ENSG00000115902.10 | SLC1A4         | 996.696211  | 1.107330179 | 0.231326343 | 4.786874531 | 1.69E-06    | 0.000471819 |
| ENSG00000203485.12 | INF2           | 2601.73643  | 1.099896418 | 0.240466864 | 4.574004092 | 4.78E-06    | 0.001074825 |
| ENSG00000151914.19 | DST            | 456.5566125 | 1.086923741 | 0.319492177 | 3.402035541 | 0.000668859 | 0.049471881 |
| ENSG00000073910.19 | FRY            | 2121.409907 | 1.086405364 | 0.164632998 | 6.598952687 | 4.14E-11    | 3.82E-08    |
| ENSG00000060558.3  | GNA15          | 913.1756182 | 1.068511516 | 0.261104624 | 4.092273434 | 4.27E-05    | 0.007060707 |
| ENSG00000128536.15 | CDHR3          | 352.0146703 | 1.057146025 | 0.294259708 | 3.592561254 | 0.000327444 | 0.030679894 |
| ENSG00000144843.11 | ADPRH          | 191.5165268 | 1.048729859 | 0.282138978 | 3.717068329 | 0.000201548 | 0.02166455  |
| ENSG00000137804.12 | NUSAP1         | 237.1530294 | 1.044055039 | 0.262475659 | 3.977721373 | 6.96E-05    | 0.010600789 |
| ENSG00000136111.12 | TBC1D4         | 8105.325607 | 1.033888877 | 0.189099663 | 5.467428464 | 4.57E-08    | 2.29E-05    |
| ENSG00000143110.11 | C1orf162       | 692.6752064 | 1.022167232 | 0.264737202 | 3.861063813 | 0.000112894 | 0.014652022 |
| ENSG00000080854.14 | IGSF9B         | 1532.803158 | 1.012702164 | 0.217450069 | 4.657171045 | 3.21E-06    | 0.000780132 |
| ENSG00000139679.15 | LPAR6          | 3886.299659 | 1.011626708 | 0.209361561 | 4.831960096 | 1.35E-06    | 0.000401484 |
| ENSG00000059377.15 | TBXAS1         | 519.2976547 | 1.008054867 | 0.218317961 | 4.617370286 | 3.89E-06    | 0.000895954 |

**Table S5 B: down-regulated genes in circulating pTh17-cells as compared to CCR5<sup>+</sup>Th1/17-cells**

| Gene_id            | Gene_name | baseMean    | log2FoldChange | lfcSE       | stat         | pvalue      | padj        |
|--------------------|-----------|-------------|----------------|-------------|--------------|-------------|-------------|
| ENSG00000124507.10 | PACSIN1   | 110.4335766 | -2.233813642   | 0.367976181 | -6.070538691 | 1.27E-09    | 9.71E-07    |
| ENSG00000213949.8  | ITGA1     | 1292.886476 | -2.229673609   | 0.243658155 | -9.150826924 | 5.65E-20    | 1.98E-16    |
| ENSG00000271503.5  | CCL5      | 3934.335083 | -2.026195302   | 0.208459312 | -9.71985985  | 2.48E-22    | 1.45E-18    |
| ENSG00000215475.4  | SIAH3     | 96.63536445 | -2.010137518   | 0.372504068 | -5.396283393 | 6.80E-08    | 2.91E-05    |
| ENSG00000186810.7  | CXCR3     | 1587.158809 | -1.887771767   | 0.195976926 | -9.632622616 | 5.82E-22    | 2.55E-18    |
| ENSG00000146904.8  | EPHA1     | 694.1666901 | -1.740868298   | 0.255496967 | -6.813655444 | 9.51E-12    | 1.39E-08    |
| ENSG00000171502.14 | COL24A1   | 109.0789964 | -1.629133764   | 0.454342003 | -3.585699217 | 0.000336176 | 0.031000759 |
| ENSG00000166833.19 | NAV2      | 106.7732559 | -1.575585017   | 0.391810717 | -4.021291276 | 5.79E-05    | 0.009219229 |
| ENSG00000114948.12 | ADAM23    | 1773.927696 | -1.55229076    | 0.234025054 | -6.633011002 | 3.29E-11    | 3.39E-08    |
| ENSG00000126838.9  | PZP       | 167.6818489 | -1.502823741   | 0.391718903 | -3.83648512  | 0.000124808 | 0.01561969  |
| ENSG00000198756.10 | COLGALT2  | 105.8462199 | -1.479116748   | 0.426817797 | -3.465452376 | 0.00052934  | 0.042543903 |
| ENSG00000162415.6  | ZSWIM5    | 405.5187365 | -1.460983332   | 0.303880086 | -4.807762663 | 1.53E-06    | 0.000445702 |
| ENSG00000146674.14 | IGFBP3    | 715.7329892 | -1.408908455   | 0.265195965 | -5.312706987 | 1.08E-07    | 4.21E-05    |
| ENSG00000110811.19 | P3H3      | 110.1774473 | -1.402326803   | 0.380281976 | -3.687597339 | 0.000226382 | 0.024038972 |
| ENSG00000163508.12 | EOMES     | 626.4131388 | -1.39670364    | 0.227375706 | -6.142712723 | 8.11E-10    | 6.46E-07    |
| ENSG00000157657.14 | ZNF618    | 97.37125346 | -1.395790649   | 0.367900909 | -3.793930962 | 0.000148281 | 0.0173202   |
| ENSG00000139187.9  | KLRG1     | 668.3920327 | -1.317720844   | 0.291032381 | -4.527746505 | 5.96E-06    | 0.001289546 |
| ENSG00000164684.13 | ZNF704    | 309.3018519 | -1.284906182   | 0.364063663 | -3.529344759 | 0.00041659  | 0.03649537  |
| ENSG00000100311.16 | PDGFB     | 299.850589  | -1.207038923   | 0.274581583 | -4.395920909 | 1.10E-05    | 0.002123778 |
| ENSG00000198915.11 | RASGEF1A  | 582.1107883 | -1.194414194   | 0.281214454 | -4.247342823 | 2.16E-05    | 0.003787058 |
| ENSG00000176533.12 | GNG7      | 211.6078581 | -1.178515598   | 0.268296408 | -4.392588053 | 1.12E-05    | 0.002133167 |
| ENSG00000071242.11 | RPS6KA2   | 1682.396625 | -1.177724799   | 0.270010285 | -4.361777554 | 1.29E-05    | 0.002430521 |
| ENSG00000236609.3  | ZNF853    | 244.6565154 | -1.17620971    | 0.253181662 | -4.645714458 | 3.39E-06    | 0.000802418 |
| ENSG00000088538.12 | DOCK3     | 379.653524  | -1.160048447   | 0.29615034  | -3.91709308  | 8.96E-05    | 0.012561102 |
| ENSG00000144290.16 | SLC4A10   | 1245.747324 | -1.130737046   | 0.275119263 | -4.109988644 | 3.96E-05    | 0.006602556 |
| ENSG00000184613.10 | NELL2     | 7117.647444 | -1.118407264   | 0.206166562 | -5.424775254 | 5.80E-08    | 2.66E-05    |
| ENSG00000034053.14 | APBA2     | 857.9366837 | -1.111247547   | 0.247694107 | -4.486370552 | 7.24E-06    | 0.00149334  |
| ENSG00000166707.10 | ZCCHC18   | 415.9260376 | -1.110608687   | 0.299932436 | -3.702862889 | 0.00021318  | 0.022775175 |
| ENSG00000100298.15 | APOBEC3H  | 192.3268472 | -1.077198876   | 0.274512058 | -3.924049394 | 8.71E-05    | 0.012504949 |
| ENSG00000147180.16 | ZNF711    | 187.903474  | -1.0771918     | 0.28188813  | -3.821345009 | 0.000132726 | 0.016262161 |
| ENSG00000008311.14 | AASS      | 422.4976677 | -1.042295854   | 0.269202755 | -3.871787472 | 0.00010804  | 0.0143153   |
| ENSG00000123612.15 | ACVR1C    | 488.9183263 | -1.024151168   | 0.293187972 | -3.493155474 | 0.000477349 | 0.039265836 |
| ENSG00000187118.12 | CMC1      | 597.5769109 | -1.023498542   | 0.294414682 | -3.476384181 | 0.000508224 | 0.041224941 |
| ENSG00000168824.14 | NSG1      | 2134.81068  | -1.011686086   | 0.254896291 | -3.96901062  | 7.22E-05    | 0.010807861 |
| ENSG00000214193.9  | SH3D21    | 121.4844516 | -1.004667067   | 0.28714516  | -3.498812475 | 0.000467335 | 0.038991328 |

**Table S6 A: up-regulated genes in circulating pTh17-cells as compared to all other CCR6<sup>+</sup>Th subsets**

| Gene_id            | Gene_name | baseMean    | log2FoldChange | lfcSE       | stat        | pvalue      | padj        |
|--------------------|-----------|-------------|----------------|-------------|-------------|-------------|-------------|
| ENSG00000178860.8  | MSC       | 347.6137529 | 2.345445676    | 0.373219622 | 6.284357893 | 3.29E-10    | 1.05E-06    |
| ENSG00000198910.12 | L1CAM     | 86.23332104 | 2.265056629    | 0.544619133 | 4.158973656 | 3.20E-05    | 0.007429462 |
| ENSG00000076706.15 | MCAM      | 1068.806163 | 2.203103043    | 0.321527196 | 6.851995944 | 7.28E-12    | 1.11E-07    |
| ENSG00000080573.6  | COL5A3    | 4766.905869 | 1.907517932    | 0.495360815 | 3.850764685 | 0.00011775  | 0.016952609 |
| ENSG00000124019.9  | FAM124B   | 67.36339937 | 1.90067851     | 0.418636115 | 4.540168513 | 5.62E-06    | 0.002199513 |
| ENSG00000189350.12 | FAM179A   | 288.3774294 | 1.834552211    | 0.360900171 | 5.083267777 | 3.71E-07    | 0.000246164 |
| ENSG00000179388.8  | EGR3      | 81.78231338 | 1.819008497    | 0.319911312 | 5.685977419 | 1.30E-08    | 1.80E-05    |
| ENSG00000182511.11 | FES       | 234.3770834 | 1.767507764    | 0.294988342 | 5.991788532 | 2.08E-09    | 4.14E-06    |
| ENSG00000121594.11 | CD80      | 75.82923664 | 1.718452407    | 0.321153839 | 5.350869887 | 8.75E-08    | 7.42E-05    |
| ENSG00000029153.14 | ARNTL2    | 53.026605   | 1.711921056    | 0.301952588 | 5.669502847 | 1.43E-08    | 1.82E-05    |
| ENSG00000163701.18 | IL17RE    | 376.1687526 | 1.562407813    | 0.305588284 | 5.112787016 | 3.17E-07    | 0.000220202 |
| ENSG00000049759.17 | NEDD4L    | 350.8915503 | 1.490171596    | 0.330772571 | 4.505124451 | 6.63E-06    | 0.002410295 |
| ENSG00000144843.11 | ADPRH     | 191.5165268 | 1.478452857    | 0.288313019 | 5.127943445 | 2.93E-07    | 0.000212872 |
| ENSG00000042493.15 | CAPG      | 643.1260428 | 1.446990639    | 0.313994633 | 4.608329213 | 4.06E-06    | 0.001720752 |
| ENSG00000073282.12 | TP63      | 46.7169545  | 1.398713101    | 0.348954054 | 4.00830162  | 6.12E-05    | 0.011244779 |
| ENSG00000056736.9  | IL17RB    | 205.9077277 | 1.389131737    | 0.33453526  | 4.15242249  | 3.29E-05    | 0.007429462 |
| ENSG00000196169.14 | KIF19     | 166.3664407 | 1.382853676    | 0.287790216 | 4.80507536  | 1.55E-06    | 0.000694345 |
| ENSG00000100097.11 | LGALS1    | 1014.41496  | 1.35864655     | 0.216430411 | 6.277521449 | 3.44E-10    | 1.05E-06    |
| ENSG00000122877.14 | EGR2      | 179.6517008 | 1.344904631    | 0.269596169 | 4.988589551 | 6.08E-07    | 0.000357    |
| ENSG00000115902.10 | SLC1A4    | 996.696211  | 1.333130711    | 0.225691063 | 5.906883026 | 3.49E-09    | 5.91E-06    |
| ENSG00000138764.13 | CCNG2     | 1730.877731 | 1.320098913    | 0.204392386 | 6.458650155 | 1.06E-10    | 8.06E-07    |
| ENSG00000115009.11 | CCL20     | 603.9510322 | 1.305635741    | 0.339800452 | 3.842360228 | 0.000121857 | 0.017061072 |
| ENSG00000144354.13 | CDCA7     | 652.1629881 | 1.282919307    | 0.339070948 | 3.783630869 | 0.000154557 | 0.020510386 |
| ENSG00000180549.7  | FUT7      | 340.1415854 | 1.267458454    | 0.346803531 | 3.654687284 | 0.000257496 | 0.028894419 |
| ENSG00000060558.3  | GNA15     | 913.1756182 | 1.250783148    | 0.230117674 | 5.435406706 | 5.47E-08    | 5.21E-05    |
| ENSG00000120875.8  | DUSP4     | 1962.212506 | 1.231892823    | 0.320359866 | 3.845340679 | 0.000120385 | 0.017038157 |
| ENSG00000072832.14 | CRMP1     | 70.70737402 | 1.207746407    | 0.348456357 | 3.465990457 | 0.000528282 | 0.04915922  |
| ENSG00000188389.10 | PDCD1     | 98.85163297 | 1.185689575    | 0.309014626 | 3.837001469 | 0.000124546 | 0.017149264 |
| ENSG00000139289.13 | PHLDA1    | 1440.29888  | 1.165811671    | 0.267773622 | 4.353721103 | 1.34E-05    | 0.004168619 |
| ENSG00000143013.12 | LMO4      | 1295.720676 | 1.131273755    | 0.213580954 | 5.296697723 | 1.18E-07    | 9.47E-05    |
| ENSG00000163629.12 | PTPN13    | 4806.598336 | 1.12141378     | 0.203505281 | 5.51048983  | 3.58E-08    | 3.64E-05    |
| ENSG00000164120.13 | HPGD      | 485.811863  | 1.091590953    | 0.269781295 | 4.046206959 | 5.21E-05    | 0.010316875 |
| ENSG00000137804.12 | NUSAP1    | 237.1530294 | 1.050915821    | 0.203569261 | 5.16244848  | 2.44E-07    | 0.000185986 |
| ENSG00000059377.15 | TBXAS1    | 519.2976547 | 1.046368971    | 0.193507866 | 5.407371769 | 6.40E-08    | 5.74E-05    |
| ENSG00000136286.14 | MYO1G     | 6125.858085 | 1.043978537    | 0.271519359 | 3.844950657 | 0.000120577 | 0.017038157 |
| ENSG00000135631.16 | RAB11FIP5 | 1169.124402 | 1.015601768    | 0.247527862 | 4.102979603 | 4.08E-05    | 0.008645001 |
| ENSG00000196154.11 | S100A4    | 7338.763482 | 1.009591537    | 0.270911473 | 3.726647402 | 0.000194044 | 0.02447355  |
| ENSG00000106089.11 | STX1A     | 597.2989354 | 1.005029559    | 0.278029793 | 3.61482685  | 0.000300548 | 0.031415545 |

**Table S6 B: down-regulated genes in circulating pTh17-cells as compared to all other CCR6<sup>+</sup>Th subsets**

| Gene_id            | Gene_name | baseMean    | log2FoldChange | lfcSE       | stat         | pvalue      | padj        |
|--------------------|-----------|-------------|----------------|-------------|--------------|-------------|-------------|
| ENSG00000261115.5  | TMEM178B  | 64.6247507  | -2.471817498   | 0.623325633 | -3.965531609 | 7.32E-05    | 0.012038275 |
| ENSG00000215475.4  | SIAH3     | 96.63536445 | -2.431159818   | 0.494416728 | -4.917228084 | 8.78E-07    | 0.000449213 |
| ENSG00000114948.12 | ADAM23    | 1773.927696 | -2.244796029   | 0.621896947 | -3.609594871 | 0.000306676 | 0.031837934 |
| ENSG00000185272.13 | RBM11     | 82.0700817  | -2.127744972   | 0.612855482 | -3.471854349 | 0.000516877 | 0.048392976 |
| ENSG00000133138.19 | TBC1D8B   | 97.54184192 | -1.907151438   | 0.518573225 | -3.677689755 | 0.000235356 | 0.027227206 |
| ENSG00000034053.14 | APBA2     | 857.9366837 | -1.813285336   | 0.325380581 | -5.572813636 | 2.51E-08    | 2.94E-05    |
| ENSG00000164684.13 | ZNF704    | 309.3018519 | -1.72372396    | 0.422377379 | -4.081004441 | 4.48E-05    | 0.00924765  |
| ENSG00000151491.12 | EPS8      | 76.45906601 | -1.705552117   | 0.442045807 | -3.858315342 | 0.000114171 | 0.016794028 |
| ENSG00000139193.3  | CD27      | 577.1332149 | -1.502231274   | 0.351284362 | -4.276396668 | 1.90E-05    | 0.005367991 |
| ENSG00000151376.16 | ME3       | 65.17255135 | -1.336334491   | 0.342411307 | -3.902717185 | 9.51E-05    | 0.014925425 |
| ENSG00000146904.8  | EPHA1     | 694.1666901 | -1.318062119   | 0.296605612 | -4.443820563 | 8.84E-06    | 0.002931947 |
| ENSG00000184613.10 | NELL2     | 7117.647444 | -1.258134558   | 0.259003824 | -4.857590664 | 1.19E-06    | 0.000549501 |
| ENSG00000198939.7  | ZFP2      | 73.09226834 | -1.253524732   | 0.326725467 | -3.836630011 | 0.000124734 | 0.017149264 |
| ENSG00000147180.16 | ZNF711    | 187.903474  | -1.215734423   | 0.260004495 | -4.675820796 | 2.93E-06    | 0.001276605 |
| ENSG00000140443.13 | IGF1R     | 969.1620825 | -1.204758928   | 0.326971794 | -3.684595895 | 0.000229066 | 0.027227206 |
| ENSG00000176533.12 | GNG7      | 211.6078581 | -1.187914705   | 0.213978902 | -5.551550627 | 2.83E-08    | 3.09E-05    |
| ENSG00000223547.9  | ZNF844    | 305.1312072 | -1.158836796   | 0.330361822 | -3.507780617 | 0.000451862 | 0.043370179 |
| ENSG00000120915.13 | EPHX2     | 975.0901822 | -1.135989662   | 0.313709198 | -3.621155095 | 0.000293291 | 0.031174442 |
| ENSG00000126217.20 | MCF2L     | 640.9428502 | -1.130123317   | 0.305148764 | -3.703515955 | 0.000212632 | 0.026169145 |
| ENSG00000148429.14 | USP6NL    | 216.6855335 | -1.101191631   | 0.298802709 | -3.685346876 | 0.000228391 | 0.027227206 |
| ENSG00000124613.8  | ZNF391    | 140.5077345 | -1.090679214   | 0.275068805 | -3.965114158 | 7.34E-05    | 0.012038275 |
| ENSG00000171291.8  | ZNF439    | 630.7150077 | -1.073139481   | 0.256929942 | -4.176778586 | 2.96E-05    | 0.007289231 |
| ENSG00000067445.20 | TRO       | 60.92680308 | -1.020984674   | 0.279109085 | -3.658013045 | 0.000254178 | 0.028733424 |
| ENSG00000136854.18 | STXPB1    | 383.9461426 | -1.001718352   | 0.242905793 | -4.123896509 | 3.73E-05    | 0.008104473 |



**Table S7 A: up-regulated genes in intestinal pTh17-cells as compared to cTh17-cells**

| Gene_id            | Gene_name | baseMean    | log2FoldChange | lfcSE       | stat        | pvalue      | padj        |
|--------------------|-----------|-------------|----------------|-------------|-------------|-------------|-------------|
| ENSG00000131459.12 | GFPT2     | 1068.588703 | 5.147887666    | 0.369450201 | 13.9339149  | 3.94E-44    | 1.89E-40    |
| ENSG00000160791.13 | CCR5      | 1581.789269 | 4.644365221    | 0.339451206 | 13.6819818  | 1.30E-42    | 4.67E-39    |
| ENSG00000221869.4  | CEBPD     | 1000.596222 | 4.445327483    | 0.357904651 | 12.42042389 | 2.02E-35    | 2.42E-32    |
| ENSG00000104267.9  | CA2       | 391.4859723 | 4.080368668    | 0.324710428 | 12.56617686 | 3.24E-36    | 4.23E-33    |
| ENSG00000196781.14 | TLE1      | 212.3593734 | 3.745420675    | 0.315692217 | 11.86415272 | 1.82E-32    | 1.74E-29    |
| ENSG00000062524.15 | LTK       | 2387.549681 | 3.642639601    | 0.316213325 | 11.51956388 | 1.05E-30    | 8.88E-28    |
| ENSG00000172215.5  | CXCR6     | 3070.169847 | 3.588901622    | 0.65436387  | 5.484565674 | 4.14E-08    | 2.01E-06    |
| ENSG00000155629.14 | PIK3AP1   | 473.2938346 | 3.579618218    | 0.418101667 | 8.561597569 | 1.11E-17    | 2.58E-15    |
| ENSG00000144290.16 | SLC4A10   | 814.4208956 | 3.553477257    | 0.530674222 | 6.696155783 | 2.14E-11    | 1.91E-09    |
| ENSG00000178860.8  | MSC       | 579.5898228 | 3.483458799    | 0.289022474 | 12.05255341 | 1.88E-33    | 1.93E-30    |
| ENSG00000157404.15 | KIT       | 2195.429181 | 3.421497108    | 0.492871826 | 6.941961238 | 3.87E-12    | 4.08E-10    |
| ENSG00000153563.15 | CD8A      | 412.3038889 | 3.4146575      | 0.75795356  | 4.505101212 | 6.63E-06    | 0.000189264 |
| ENSG00000271503.5  | CCL5      | 11501.23145 | 3.321664186    | 0.298516732 | 11.12722948 | 9.25E-29    | 5.53E-26    |
| ENSG00000050165.17 | DKK3      | 352.1518506 | 3.15717251     | 0.293128804 | 10.77059799 | 4.74E-27    | 2.62E-24    |
| ENSG00000026751.16 | SLAMF7    | 1472.645612 | 3.109401312    | 0.703473869 | 4.420066542 | 9.87E-06    | 0.000266652 |
| ENSG00000134256.12 | CD101     | 723.351847  | 3.034003322    | 0.367918197 | 8.246407357 | 1.63E-16    | 3.17E-14    |
| ENSG00000157985.18 | AGAP1     | 111.1083272 | 3.02529974     | 0.386907924 | 7.819172341 | 5.32E-15    | 8.87E-13    |
| ENSG00000137825.10 | ITPKA     | 32.7003107  | 2.881197957    | 0.45311826  | 6.358600415 | 2.04E-10    | 1.55E-08    |
| ENSG00000270379.5  | HEATR9    | 47.39379751 | 2.819809808    | 0.531896676 | 5.301424008 | 1.15E-07    | 5.14E-06    |
| ENSG00000171476.21 | HOPX      | 1541.568841 | 2.816638736    | 0.167151912 | 16.85077187 | 1.04E-63    | 1.49E-59    |
| ENSG00000187479.5  | C11orf96  | 108.402774  | 2.791561555    | 0.433194977 | 6.444122627 | 1.16E-10    | 9.22E-09    |
| ENSG00000213949.8  | ITGA1     | 6324.408364 | 2.78926338     | 0.298190329 | 9.353969967 | 8.44E-21    | 2.69E-18    |
| ENSG00000196914.8  | ARHGEF12  | 2527.702269 | 2.749103898    | 0.187379286 | 14.671333   | 9.84E-49    | 7.06E-45    |
| ENSG00000117560.7  | FASLG     | 51.60353846 | 2.676380685    | 0.740210947 | 3.615699949 | 0.000299537 | 0.005024138 |
| ENSG00000136856.17 | SLC2A8    | 185.5756913 | 2.656449967    | 0.457089132 | 5.811667308 | 6.19E-09    | 3.54E-07    |
| ENSG00000149573.8  | MPZL2     | 456.076042  | 2.606649526    | 0.233500697 | 11.16334793 | 6.16E-29    | 3.84E-26    |
| ENSG00000075651.15 | PLD1      | 195.9355963 | 2.569770444    | 0.27734745  | 9.265527563 | 1.94E-20    | 5.93E-18    |
| ENSG00000125726.10 | CD70      | 216.937412  | 2.539441327    | 0.22405076  | 11.33422324 | 8.88E-30    | 5.79E-27    |
| ENSG00000162594.15 | IL23R     | 114.7690542 | 2.530893436    | 0.463895483 | 5.455740628 | 4.88E-08    | 2.32E-06    |
| ENSG00000007350.16 | TKTL1     | 79.30990276 | 2.469265186    | 0.366418177 | 6.738926568 | 1.60E-11    | 1.47E-09    |
| ENSG00000159335.15 | PTMS      | 742.8548316 | 2.453455778    | 0.295838287 | 8.293232776 | 1.10E-16    | 2.20E-14    |
| ENSG00000181264.8  | TMEM136   | 92.81799674 | 2.376471721    | 0.362170216 | 6.561753609 | 5.32E-11    | 4.46E-09    |
| ENSG00000092445.11 | TYRO3     | 65.40373641 | 2.373752901    | 0.366179882 | 6.482477652 | 9.02E-11    | 7.23E-09    |
| ENSG00000109906.13 | ZBTB16    | 110.4745926 | 2.351376063    | 0.459716103 | 5.114843803 | 3.14E-07    | 1.28E-05    |
| ENSG00000159307.18 | SCUBE1    | 181.525952  | 2.328096623    | 0.476514096 | 4.885682586 | 1.03E-06    | 3.71E-05    |
| ENSG00000158292.6  | GPR153    | 111.909364  | 2.313309032    | 0.512753603 | 4.511541252 | 6.44E-06    | 0.000183972 |
| ENSG00000175048.16 | ZDHHC14   | 607.214429  | 2.311958863    | 0.190753673 | 12.12012763 | 8.26E-34    | 9.12E-31    |
| ENSG00000116016.13 | EPAS1     | 340.8723779 | 2.295264009    | 0.334015977 | 6.871719226 | 6.34E-12    | 6.50E-10    |
| ENSG00000163421.8  | PROK2     | 311.4232022 | 2.269175889    | 0.331764906 | 6.839710435 | 7.94E-12    | 8.02E-10    |
| ENSG00000177191.2  | B3GNT8    | 80.18055274 | 2.267945865    | 0.338153886 | 6.706845492 | 1.99E-11    | 1.78E-09    |
| ENSG00000150457.8  | LATS2     | 229.1361132 | 2.257382044    | 0.23423263  | 9.63735088  | 5.56E-22    | 2.05E-19    |
| ENSG00000154917.10 | RAB6B     | 408.956532  | 2.243561063    | 0.330700953 | 6.784259445 | 1.17E-11    | 1.12E-09    |
| ENSG00000158806.13 | NPM2      | 61.28502265 | 2.233606486    | 0.341239168 | 6.545574768 | 5.93E-11    | 4.94E-09    |
| ENSG00000198483.12 | ANKRD35   | 60.34885828 | 2.220789661    | 0.450621535 | 4.928281249 | 8.30E-07    | 3.04E-05    |
| ENSG00000169252.5  | ADRB2     | 164.1725368 | 2.214782806    | 0.325173416 | 6.811082026 | 9.69E-12    | 9.65E-10    |
| ENSG00000134253.9  | TRIM45    | 139.5286997 | 2.184347503    | 0.292750183 | 7.461472705 | 8.56E-14    | 1.24E-11    |

|                    |          |             |             |             |             |             |             |
|--------------------|----------|-------------|-------------|-------------|-------------|-------------|-------------|
| ENSG00000162772.16 | ATF3     | 2146.841961 | 2.140849138 | 0.564683933 | 3.791234376 | 0.0001499   | 0.002837268 |
| ENSG00000177602.5  | GSG2     | 538.087807  | 2.137570179 | 0.367183447 | 5.82153198  | 5.83E-09    | 3.38E-07    |
| ENSG00000005020.12 | SKAP2    | 1186.518067 | 2.080901781 | 0.203542883 | 10.22340723 | 1.56E-24    | 7.21E-22    |
| ENSG00000139629.15 | GALNT6   | 344.9822019 | 2.073691807 | 0.208631448 | 9.939497741 | 2.80E-23    | 1.18E-20    |
| ENSG00000125657.4  | TNFSF9   | 36.46502554 | 2.071937965 | 0.389109962 | 5.324813458 | 1.01E-07    | 4.56E-06    |
| ENSG00000089692.8  | LAG3     | 659.8636874 | 2.070593465 | 0.278519001 | 7.43429876  | 1.05E-13    | 1.48E-11    |
| ENSG00000121297.6  | TSHZ3    | 43.39832752 | 2.0463735   | 0.401914913 | 5.091559015 | 3.55E-07    | 1.42E-05    |
| ENSG00000130635.15 | COL5A1   | 2128.890246 | 2.043131855 | 0.249793709 | 8.179276666 | 2.86E-16    | 5.46E-14    |
| ENSG00000140470.13 | ADAMTS17 | 118.2575966 | 2.029383889 | 0.384747274 | 5.274589388 | 1.33E-07    | 5.86E-06    |
| ENSG00000135898.9  | GPR55    | 730.9814874 | 2.010285337 | 0.315827444 | 6.365138223 | 1.95E-10    | 1.49E-08    |
| ENSG00000083457.11 | ITGAE    | 4213.774947 | 1.996746142 | 0.278919369 | 7.158865113 | 8.13E-13    | 9.98E-11    |
| ENSG00000165030.3  | NFIL3    | 424.442677  | 1.965372214 | 0.292140577 | 6.727487963 | 1.73E-11    | 1.56E-09    |
| ENSG00000065833.8  | ME1      | 286.7951642 | 1.949082183 | 0.326382633 | 5.971770507 | 2.35E-09    | 1.46E-07    |
| ENSG00000146250.6  | PRSS35   | 138.0950663 | 1.94857893  | 0.462835647 | 4.210088275 | 2.55E-05    | 0.000613091 |
| ENSG00000137501.17 | SYTL2    | 2512.004337 | 1.927212634 | 0.195052434 | 9.880484907 | 5.06E-23    | 2.02E-20    |
| ENSG00000120549.17 | KIAA1217 | 283.8505954 | 1.921919533 | 0.229456152 | 8.375977349 | 5.48E-17    | 1.12E-14    |
| ENSG00000189420.8  | ZFP92    | 450.1593034 | 1.921305855 | 0.271307132 | 7.081663662 | 1.42E-12    | 1.65E-10    |
| ENSG00000134317.17 | GRHL1    | 34.8634498  | 1.908129545 | 0.543427274 | 3.511287777 | 0.000445941 | 0.006933108 |
| ENSG00000073861.2  | TBX21    | 1264.301842 | 1.899503036 | 0.14563072  | 13.04328538 | 6.94E-39    | 1.24E-35    |
| ENSG00000109471.4  | IL2      | 272.8474718 | 1.892677809 | 0.37803268  | 5.006651305 | 5.54E-07    | 2.14E-05    |
| ENSG00000075426.11 | FOSL2    | 2004.774737 | 1.879077786 | 0.35104658  | 5.352787607 | 8.66E-08    | 3.98E-06    |
| ENSG00000115607.9  | IL18RAP  | 1868.927744 | 1.877383132 | 0.164070229 | 11.44255813 | 2.56E-30    | 2.04E-27    |
| ENSG00000112290.12 | WASF1    | 93.83298764 | 1.866886409 | 0.496556596 | 3.759664909 | 0.000170141 | 0.003158488 |
| ENSG00000076706.15 | MCAM     | 351.4856969 | 1.851970143 | 0.277498131 | 6.67381124  | 2.49E-11    | 2.21E-09    |
| ENSG00000104951.15 | IL4I1    | 1656.752857 | 1.851328905 | 0.281555332 | 6.575364391 | 4.85E-11    | 4.15E-09    |
| ENSG00000181104.6  | F2R      | 2527.862899 | 1.834708366 | 0.200481006 | 9.151532131 | 5.61E-20    | 1.64E-17    |
| ENSG00000105374.9  | NKG7     | 170.884424  | 1.82485804  | 0.304035217 | 6.002127185 | 1.95E-09    | 1.24E-07    |
| ENSG00000129521.13 | EGLN3    | 470.0464236 | 1.818321795 | 0.626149035 | 2.903976039 | 0.003684564 | 0.037445812 |
| ENSG00000152684.10 | PELO     | 1691.493521 | 1.795294079 | 0.26066748  | 6.887295947 | 5.69E-12    | 5.91E-10    |
| ENSG00000169583.12 | CLIC3    | 303.644538  | 1.78827143  | 0.381275275 | 4.690237072 | 2.73E-06    | 8.74E-05    |
| ENSG00000065361.14 | ERBB3    | 416.9463476 | 1.763671485 | 0.291443399 | 6.051506032 | 1.43E-09    | 9.44E-08    |
| ENSG00000135253.13 | KCP      | 43.84691768 | 1.755421472 | 0.42555401  | 4.125026273 | 3.71E-05    | 0.000852474 |
| ENSG00000113758.13 | DBN1     | 167.5359191 | 1.753193124 | 0.45721721  | 3.834486289 | 0.000125827 | 0.002436731 |
| ENSG00000143507.17 | DUSP10   | 1266.576516 | 1.747892959 | 0.284730659 | 6.138759221 | 8.32E-10    | 5.77E-08    |
| ENSG00000167664.8  | TMIGD2   | 1793.038091 | 1.747630011 | 0.186338098 | 9.378812113 | 6.67E-21    | 2.23E-18    |
| ENSG00000228278.3  | ORM2     | 198.3236865 | 1.744040018 | 0.383229706 | 4.550899871 | 5.34E-06    | 0.000154887 |
| ENSG00000125966.9  | MMP24    | 768.1319808 | 1.719654802 | 0.186010583 | 9.244929921 | 2.35E-20    | 7.04E-18    |
| ENSG00000107130.9  | NCS1     | 76.07587974 | 1.715790957 | 0.494617428 | 3.468925394 | 0.000522545 | 0.007960206 |
| ENSG00000074416.13 | MGLL     | 134.0809392 | 1.700366996 | 0.45284958  | 3.754816327 | 0.000173469 | 0.00319715  |
| ENSG00000117461.14 | PIK3R3   | 77.29439521 | 1.694434417 | 0.494616997 | 3.425750485 | 0.000613103 | 0.009031312 |
| ENSG00000150681.9  | RGS18    | 220.8576355 | 1.693024977 | 0.479522306 | 3.530649058 | 0.000414541 | 0.006536998 |
| ENSG00000187796.13 | CARD9    | 127.2857791 | 1.691194781 | 0.37885365  | 4.463979111 | 8.05E-06    | 0.000223303 |
| ENSG00000160183.13 | TMPRSS3  | 404.014634  | 1.688474281 | 0.286484281 | 5.893776349 | 3.77E-09    | 2.28E-07    |
| ENSG00000121797.9  | CCRL2    | 89.76861059 | 1.683351368 | 0.289173399 | 5.821252482 | 5.84E-09    | 3.38E-07    |
| ENSG00000164056.10 | SPRY1    | 910.7642979 | 1.668420591 | 0.255203287 | 6.537614048 | 6.25E-11    | 5.18E-09    |
| ENSG00000125384.6  | PTGER2   | 686.2512533 | 1.661001837 | 0.234769515 | 7.075032013 | 1.49E-12    | 1.72E-10    |
| ENSG00000010278.12 | CD9      | 373.4205709 | 1.654053908 | 0.303756365 | 5.445330864 | 5.17E-08    | 2.45E-06    |
| ENSG00000095397.13 | WHRN     | 1065.724677 | 1.653500566 | 0.244133144 | 6.772945853 | 1.26E-11    | 1.18E-09    |

|                    |             |             |             |             |             |             |             |
|--------------------|-------------|-------------|-------------|-------------|-------------|-------------|-------------|
| ENSG00000075702.16 | WDR62       | 348.2990919 | 1.647095371 | 0.221154426 | 7.447716046 | 9.50E-14    | 1.36E-11    |
| ENSG00000180644.6  | PRF1        | 1193.808003 | 1.641068954 | 0.36018547  | 4.556177558 | 5.21E-06    | 0.000151938 |
| ENSG00000035664.11 | DAPK2       | 2867.684206 | 1.639527288 | 0.285394485 | 5.744775643 | 9.20E-09    | 5.14E-07    |
| ENSG00000204161.13 | C10orf128   | 818.7964231 | 1.634737319 | 0.303895751 | 5.379270072 | 7.48E-08    | 3.46E-06    |
| ENSG00000196872.11 | KIAA1211L   | 107.3875195 | 1.619446128 | 0.246701017 | 6.564407983 | 5.22E-11    | 4.44E-09    |
| ENSG00000037280.15 | FLT4        | 214.9027435 | 1.613060155 | 0.420743214 | 3.833835224 | 0.000126161 | 0.0024399   |
| ENSG00000134242.15 | PTPN22      | 3713.581509 | 1.596208311 | 0.152817588 | 10.44518716 | 1.54E-25    | 7.90E-23    |
| ENSG00000160593.17 | JAML        | 22517.40932 | 1.590956666 | 0.228017073 | 6.977357647 | 3.01E-12    | 3.29E-10    |
| ENSG00000127946.16 | HIP1        | 671.1305637 | 1.579699768 | 0.239777502 | 6.588190118 | 4.45E-11    | 3.87E-09    |
| ENSG00000143434.15 | SEMA6C      | 701.3887952 | 1.578103668 | 0.160134618 | 9.854856414 | 6.53E-23    | 2.47E-20    |
| ENSG00000061337.15 | LZTS1       | 643.5700579 | 1.576036265 | 0.305722221 | 5.155124998 | 2.53E-07    | 1.05E-05    |
| ENSG00000171954.12 | CYP4F22     | 216.9120156 | 1.56287614  | 0.202054694 | 7.734916251 | 1.03E-14    | 1.69E-12    |
| ENSG00000151117.8  | TMEM86A     | 85.9939     | 1.552978247 | 0.313177856 | 4.958774113 | 7.09E-07    | 2.66E-05    |
| ENSG00000101000.5  | PROCR       | 55.30853354 | 1.552798108 | 0.368745756 | 4.211026389 | 2.54E-05    | 0.000613091 |
| ENSG00000171860.4  | C3AR1       | 590.6581125 | 1.54198356  | 0.228426947 | 6.750445078 | 1.47E-11    | 1.36E-09    |
| ENSG00000120318.15 | ARAP3       | 1231.999615 | 1.537502448 | 0.301238089 | 5.103944365 | 3.33E-07    | 1.34E-05    |
| ENSG00000198756.10 | COLGALT2    | 383.7967943 | 1.528916121 | 0.237651968 | 6.433425048 | 1.25E-10    | 9.78E-09    |
| ENSG00000072682.18 | P4HA2       | 102.5810578 | 1.520259956 | 0.460814699 | 3.299070017 | 0.000970057 | 0.01312     |
| ENSG00000063438.16 | AHRR        | 1698.216035 | 1.518308778 | 0.284150224 | 5.343331271 | 9.13E-08    | 4.16E-06    |
| ENSG00000134802.17 | SLC43A3     | 421.994912  | 1.506607895 | 0.242473289 | 6.21350048  | 5.18E-10    | 3.72E-08    |
| ENSG00000197635.9  | DPP4        | 4274.807367 | 1.50159241  | 0.304037481 | 4.938839789 | 7.86E-07    | 2.91E-05    |
| ENSG00000185340.15 | GAS2L1      | 208.1421959 | 1.492331419 | 0.208507312 | 7.15721385  | 8.23E-13    | 1.00E-10    |
| ENSG00000129654.7  | FOXJ1       | 110.5753211 | 1.488217122 | 0.431241901 | 3.451003064 | 0.000558507 | 0.008445288 |
| ENSG00000120833.13 | SOCS2       | 124.9446246 | 1.477300091 | 0.429851941 | 3.436764966 | 0.000588706 | 0.00873623  |
| ENSG00000164120.13 | HPGD        | 166.9358189 | 1.470363961 | 0.485919876 | 3.025939121 | 0.002478622 | 0.027615082 |
| ENSG00000237693.4  | IRGM        | 68.37622708 | 1.466454229 | 0.283268395 | 5.176907326 | 2.26E-07    | 9.47E-06    |
| ENSG00000138741.10 | TRPC3       | 51.3037523  | 1.465006918 | 0.481329736 | 3.043665928 | 0.002337145 | 0.026324987 |
| ENSG00000155093.17 | PTPRN2      | 211.1496877 | 1.462035808 | 0.258353786 | 5.65904541  | 1.52E-08    | 8.12E-07    |
| ENSG00000188001.9  | TPRG1       | 242.5993994 | 1.450738559 | 0.314865902 | 4.607480676 | 4.08E-06    | 0.000124706 |
| ENSG00000117016.9  | RIMS3       | 765.908729  | 1.44146125  | 0.167477872 | 8.606875812 | 7.51E-18    | 1.77E-15    |
| ENSG00000167123.18 | CERCAM      | 86.98595395 | 1.429426369 | 0.384288874 | 3.719666282 | 0.000199486 | 0.003614428 |
| ENSG00000145246.13 | ATP10D      | 286.3144298 | 1.425917378 | 0.254445319 | 5.604022841 | 2.09E-08    | 1.09E-06    |
| ENSG00000091436.16 | AC013461.1  | 146.005475  | 1.420784024 | 0.342191171 | 4.152018364 | 3.30E-05    | 0.000767715 |
| ENSG00000135318.11 | NT5E        | 184.5958089 | 1.418629087 | 0.376829397 | 3.764645486 | 0.000166786 | 0.003102017 |
| ENSG00000138670.17 | RASGEF1B    | 1090.09913  | 1.413879988 | 0.340210904 | 4.155892632 | 3.24E-05    | 0.000759753 |
| ENSG00000134247.9  | PTGFRN      | 205.7951709 | 1.413594279 | 0.219601304 | 6.437094186 | 1.22E-10    | 9.60E-09    |
| ENSG00000142949.16 | PTPRF       | 128.907957  | 1.403940116 | 0.264593222 | 5.306032056 | 1.12E-07    | 5.02E-06    |
| ENSG00000068489.12 | PRR11       | 59.76286092 | 1.395661801 | 0.413099148 | 3.378515325 | 0.000728784 | 0.010323836 |
| ENSG00000145220.13 | LYAR        | 1260.90703  | 1.388858551 | 0.213591784 | 6.502396875 | 7.91E-11    | 6.41E-09    |
| ENSG00000247595.4  | SPTY2D1-AS1 | 28.58222479 | 1.380571008 | 0.409842365 | 3.368541483 | 0.00075567  | 0.010646884 |
| ENSG00000147889.17 | CDKN2A      | 281.7188874 | 1.380311497 | 0.272809053 | 5.059624964 | 4.20E-07    | 1.66E-05    |
| ENSG00000158321.15 | AUTS2       | 3411.165005 | 1.379085224 | 0.221891402 | 6.215135931 | 5.13E-10    | 3.70E-08    |
| ENSG00000101773.17 | RBBP8       | 175.0933682 | 1.365979501 | 0.402843744 | 3.390842039 | 0.000696782 | 0.01001634  |
| ENSG00000198796.6  | ALPK2       | 224.006633  | 1.363740821 | 0.363210444 | 3.754685037 | 0.00017356  | 0.00319715  |
| ENSG00000160588.9  | MPZL3       | 3343.070318 | 1.361340785 | 0.196357864 | 6.932957788 | 4.12E-12    | 4.32E-10    |
| ENSG00000112378.11 | PERP        | 1660.636601 | 1.35758301  | 0.160358893 | 8.465904103 | 2.54E-17    | 5.61E-15    |
| ENSG00000100298.15 | APOBEC3H    | 323.3438752 | 1.3561595   | 0.299746441 | 4.524355635 | 6.06E-06    | 0.000174913 |
| ENSG00000170522.9  | ELOVL6      | 355.7195377 | 1.354279223 | 0.225806151 | 5.997530256 | 2.00E-09    | 1.27E-07    |

|                    |          |             |             |             |             |             |             |
|--------------------|----------|-------------|-------------|-------------|-------------|-------------|-------------|
| ENSG00000118503.14 | TNFAIP3  | 62877.5039  | 1.351669951 | 0.305061017 | 4.430818341 | 9.39E-06    | 0.000255621 |
| ENSG00000185920.15 | PTCH1    | 301.7230488 | 1.351335799 | 0.316518661 | 4.269371652 | 1.96E-05    | 0.000489209 |
| ENSG00000138336.8  | TET1     | 77.54695211 | 1.334154382 | 0.320833858 | 4.158396461 | 3.20E-05    | 0.000753938 |
| ENSG00000174307.6  | PHLDA3   | 555.283     | 1.332423484 | 0.226862442 | 5.873266065 | 4.27E-09    | 2.55E-07    |
| ENSG00000154229.11 | PRKCA    | 2355.338672 | 1.330566215 | 0.153616044 | 8.661635748 | 4.65E-18    | 1.11E-15    |
| ENSG00000123685.8  | BATF3    | 65.43292885 | 1.327896307 | 0.465776452 | 2.850930532 | 0.004359149 | 0.042524671 |
| ENSG00000184730.10 | APOBR    | 1923.189322 | 1.325699184 | 0.167569582 | 7.911335523 | 2.55E-15    | 4.46E-13    |
| ENSG00000120129.5  | DUSP1    | 10048.01166 | 1.32091203  | 0.299821557 | 4.405660634 | 1.05E-05    | 0.000282347 |
| ENSG00000092853.13 | CLSPN    | 53.74465946 | 1.31686618  | 0.409045219 | 3.219365777 | 0.001284745 | 0.016519793 |
| ENSG00000143036.16 | SLC44A3  | 133.3318833 | 1.315306587 | 0.357606959 | 3.678078834 | 0.000234997 | 0.004142766 |
| ENSG00000160469.16 | BRSK1    | 124.5371291 | 1.309932226 | 0.2618904   | 5.001833695 | 5.68E-07    | 2.18E-05    |
| ENSG00000168917.8  | SLC35G2  | 25.37015265 | 1.309547071 | 0.421030132 | 3.110340503 | 0.001868718 | 0.022016504 |
| ENSG00000105255.10 | FSD1     | 412.988232  | 1.293650219 | 0.262059798 | 4.936469576 | 7.95E-07    | 2.94E-05    |
| ENSG00000168487.17 | BMP1     | 835.1426568 | 1.292136585 | 0.235027112 | 5.497819258 | 3.85E-08    | 1.88E-06    |
| ENSG00000196814.14 | MVB12B   | 2203.594363 | 1.290827086 | 0.196282298 | 6.576380543 | 4.82E-11    | 4.14E-09    |
| ENSG00000169554.17 | ZEB2     | 492.4885255 | 1.290790131 | 0.328211894 | 3.932795108 | 8.40E-05    | 0.00172372  |
| ENSG00000065989.15 | PDE4A    | 1029.052271 | 1.290669128 | 0.164090658 | 7.865585659 | 3.67E-15    | 6.28E-13    |
| ENSG00000115594.11 | IL1R1    | 941.8105023 | 1.283640119 | 0.201923535 | 6.357060438 | 2.06E-10    | 1.55E-08    |
| ENSG00000163040.14 | CCDC74A  | 99.40012398 | 1.282964915 | 0.2225536   | 5.764745736 | 8.18E-09    | 4.62E-07    |
| ENSG00000104490.17 | NCALD    | 417.964228  | 1.278072331 | 0.3434822   | 3.720927401 | 0.000198492 | 0.00360097  |
| ENSG00000104368.17 | PLAT     | 430.0475301 | 1.277677832 | 0.303370485 | 4.211608897 | 2.54E-05    | 0.000613091 |
| ENSG00000130202.9  | NECTIN2  | 128.8341785 | 1.27767197  | 0.45807911  | 2.789195015 | 0.005283924 | 0.049013772 |
| ENSG00000158747.13 | NBL1     | 123.6023715 | 1.268091085 | 0.25637826  | 4.946172443 | 7.57E-07    | 2.81E-05    |
| ENSG00000256235.1  | SMIM3    | 918.6427636 | 1.266385914 | 0.170696907 | 7.418915409 | 1.18E-13    | 1.65E-11    |
| ENSG00000182621.17 | PLCB1    | 425.8716652 | 1.265569174 | 0.286272091 | 4.42086118  | 9.83E-06    | 0.000266174 |
| ENSG00000173114.12 | LRRN3    | 1483.275348 | 1.265442174 | 0.264372713 | 4.786583912 | 1.70E-06    | 5.71E-05    |
| ENSG00000115009.11 | CCL20    | 1051.81954  | 1.260013346 | 0.272130198 | 4.630185678 | 3.65E-06    | 0.000113476 |
| ENSG00000088826.17 | SMOX     | 920.5811335 | 1.259417756 | 0.185820669 | 6.77759779  | 1.22E-11    | 1.15E-09    |
| ENSG00000206013.2  | IFITM5   | 175.5237576 | 1.256189306 | 0.430854402 | 2.915577278 | 0.003550312 | 0.036496717 |
| ENSG00000085563.14 | ABCB1    | 3625.846948 | 1.255800033 | 0.18047705  | 6.958225602 | 3.45E-12    | 3.69E-10    |
| ENSG00000205730.6  | ITPRIPL2 | 325.553302  | 1.252426953 | 0.344404776 | 3.636497048 | 0.000276371 | 0.004726962 |
| ENSG00000215045.8  | GRID2IP  | 73.59028093 | 1.251602555 | 0.307706104 | 4.06752592  | 4.75E-05    | 0.001057115 |
| ENSG00000124813.20 | RUNX2    | 1712.232959 | 1.249099727 | 0.147038956 | 8.495025813 | 1.98E-17    | 4.44E-15    |
| ENSG00000177606.6  | JUN      | 42237.56453 | 1.246611462 | 0.294105324 | 4.238656559 | 2.25E-05    | 0.000547837 |
| ENSG00000163754.17 | GYG1     | 3154.365924 | 1.245388789 | 0.207203367 | 6.010465982 | 1.85E-09    | 1.19E-07    |
| ENSG00000169679.14 | BUB1     | 105.7443694 | 1.240897505 | 0.352706594 | 3.518214642 | 0.000434461 | 0.006798814 |
| ENSG00000124145.6  | SDC4     | 512.1492203 | 1.240031651 | 0.173125754 | 7.162606495 | 7.92E-13    | 9.79E-11    |
| ENSG00000105767.2  | CADM4    | 119.4982642 | 1.237884973 | 0.193267442 | 6.405036248 | 1.50E-10    | 1.17E-08    |
| ENSG00000167613.15 | LAIR1    | 505.5703063 | 1.214803511 | 0.315631226 | 3.848806487 | 0.000118695 | 0.002312684 |
| ENSG00000235162.8  | C12orf75 | 308.5874216 | 1.207847637 | 0.202706566 | 5.958601451 | 2.54E-09    | 1.57E-07    |
| ENSG00000111817.16 | DSE      | 1598.554781 | 1.203786634 | 0.189710212 | 6.345397135 | 2.22E-10    | 1.67E-08    |
| ENSG00000123080.10 | CDKN2C   | 178.9333286 | 1.200299301 | 0.204462633 | 5.870506908 | 4.34E-09    | 2.57E-07    |
| ENSG00000178075.19 | GRAMD1C  | 532.9610523 | 1.196059323 | 0.33597301  | 3.559986325 | 0.000370874 | 0.005966416 |
| ENSG00000141682.11 | PMAIP1   | 959.8103203 | 1.195842005 | 0.314048871 | 3.807821378 | 0.000140196 | 0.002682426 |
| ENSG00000162073.13 | PAQR4    | 106.8928948 | 1.187283001 | 0.422940734 | 2.807208919 | 0.004997282 | 0.046962015 |
| ENSG00000050438.16 | SLC4A8   | 75.59784485 | 1.180660782 | 0.399534039 | 2.955094353 | 0.003125734 | 0.033054008 |
| ENSG00000185010.13 | F8       | 315.2126882 | 1.176395476 | 0.238969273 | 4.922789706 | 8.53E-07    | 3.12E-05    |
| ENSG00000138764.13 | CCNG2    | 1295.200637 | 1.172627617 | 0.275130901 | 4.262071662 | 2.03E-05    | 0.000503718 |

|                    |               |             |             |             |             |             |             |
|--------------------|---------------|-------------|-------------|-------------|-------------|-------------|-------------|
| ENSG0000008256.15  | CYTH3         | 3674.335653 | 1.170344286 | 0.139892141 | 8.366047432 | 5.96E-17    | 1.20E-14    |
| ENSG00000125462.16 | C1orf61       | 69.88396531 | 1.170095512 | 0.286005192 | 4.091168782 | 4.29E-05    | 0.000968833 |
| ENSG00000163923.9  | RPL39L        | 139.6938207 | 1.170011302 | 0.262647973 | 4.454674784 | 8.40E-06    | 0.000232311 |
| ENSG00000177374.12 | HIC1          | 2340.244673 | 1.16734593  | 0.240225469 | 4.85937622  | 1.18E-06    | 4.16E-05    |
| ENSG00000122877.14 | EGR2          | 171.8061143 | 1.163654791 | 0.403845942 | 2.881432425 | 0.003958721 | 0.039642462 |
| ENSG00000185697.16 | MYBL1         | 1287.844298 | 1.162894211 | 0.152956952 | 7.60275488  | 2.90E-14    | 4.57E-12    |
| ENSG00000145990.10 | GFOD1         | 164.6112713 | 1.159560999 | 0.344777521 | 3.363215196 | 0.000770403 | 0.010806726 |
| ENSG00000153885.14 | KCTD15        | 127.8426321 | 1.159139306 | 0.385242781 | 3.008854057 | 0.002622351 | 0.028835808 |
| ENSG00000175556.16 | LONRF3        | 407.1900852 | 1.151177666 | 0.246413686 | 4.671727805 | 2.99E-06    | 9.48E-05    |
| ENSG00000152229.18 | PSTPIP2       | 242.0901655 | 1.145598807 | 0.321387988 | 3.564535236 | 0.000364501 | 0.005903608 |
| ENSG00000119326.14 | CTNNA1        | 329.5579897 | 1.141163324 | 0.200726534 | 5.685164304 | 1.31E-08    | 7.00E-07    |
| ENSG00000151062.14 | CACNA2D4      | 660.0142938 | 1.14069219  | 0.150209978 | 7.593984144 | 3.10E-14    | 4.84E-12    |
| ENSG00000236320.3  | SLFN14        | 119.0442216 | 1.139769338 | 0.294992404 | 3.863724362 | 0.000111671 | 0.002195181 |
| ENSG00000172602.9  | RND1          | 74.89466369 | 1.139451988 | 0.299901861 | 3.799416197 | 0.000145037 | 0.002767667 |
| ENSG00000077984.5  | CST7          | 2701.183998 | 1.138175679 | 0.227815858 | 4.996033599 | 5.85E-07    | 2.24E-05    |
| ENSG00000183963.18 | SMTN          | 123.0637085 | 1.132423167 | 0.404962179 | 2.796367726 | 0.005168056 | 0.048240464 |
| ENSG00000127951.6  | FGL2          | 135.4970759 | 1.126784859 | 0.404389182 | 2.786387246 | 0.005329916 | 0.049344703 |
| ENSG00000142046.14 | TMEM91        | 213.8320349 | 1.124494686 | 0.186018865 | 6.045057233 | 1.49E-09    | 9.74E-08    |
| ENSG00000161031.12 | PGLYRP2       | 149.3603902 | 1.112301333 | 0.311797057 | 3.567388811 | 0.000360556 | 0.00585955  |
| ENSG00000215529.12 | EFCAB8        | 107.557233  | 1.111329856 | 0.371919535 | 2.988092184 | 0.002807249 | 0.030495094 |
| ENSG00000185924.6  | RTN4RL1       | 50.02892345 | 1.109621879 | 0.372362397 | 2.979951486 | 0.00288294  | 0.031203908 |
| ENSG00000103269.13 | RHBDL1        | 124.6365183 | 1.107364519 | 0.371868278 | 2.977840765 | 0.002902868 | 0.03134398  |
| ENSG00000137804.12 | NUSAP1        | 300.0283106 | 1.106542863 | 0.276440338 | 4.002827051 | 6.26E-05    | 0.00133855  |
| ENSG00000196141.13 | SPATS2L       | 578.5994144 | 1.103618247 | 0.239277861 | 4.612287335 | 3.98E-06    | 0.000122378 |
| ENSG00000142945.12 | KIF2C         | 89.91184596 | 1.101886918 | 0.276348397 | 3.987310691 | 6.68E-05    | 0.001409424 |
| ENSG00000137801.10 | THBS1         | 1142.627852 | 1.10126412  | 0.297380246 | 3.703218814 | 0.000212881 | 0.003818555 |
| ENSG00000272899.3  | RP11-309L24.4 | 72.68376883 | 1.097061937 | 0.23567433  | 4.654991223 | 3.24E-06    | 0.000102408 |
| ENSG00000160293.16 | VAV2          | 1307.473753 | 1.092489751 | 0.295987677 | 3.690997414 | 0.000223376 | 0.003972059 |
| ENSG00000187642.9  | PERM1         | 73.12014506 | 1.090431538 | 0.287212041 | 3.796608014 | 0.000146689 | 0.002783369 |
| ENSG00000135916.15 | ITM2C         | 3272.204145 | 1.088896764 | 0.253953032 | 4.287788    | 1.80E-05    | 0.000455793 |
| ENSG00000090104.11 | RGS1          | 8178.659776 | 1.086991679 | 0.307193906 | 3.538454568 | 0.000402477 | 0.006395945 |
| ENSG00000187240.13 | DYNC2H1       | 232.6475089 | 1.086344462 | 0.296967311 | 3.658128085 | 0.000254064 | 0.004413825 |
| ENSG00000182534.13 | MXRA7         | 1671.741691 | 1.086020842 | 0.151889186 | 7.150086667 | 8.67E-13    | 1.04E-10    |
| ENSG0000020426.10  | MNAT1         | 151.7979786 | 1.083020195 | 0.204982638 | 5.283472812 | 1.27E-07    | 5.61E-06    |
| ENSG00000187583.10 | PLEKHN1       | 582.6215848 | 1.080280755 | 0.228511769 | 4.727462226 | 2.27E-06    | 7.53E-05    |
| ENSG00000124767.6  | GLO1          | 3449.897612 | 1.078218035 | 0.163445881 | 6.596789267 | 4.20E-11    | 3.68E-09    |
| ENSG00000196576.14 | PLXNB2        | 635.025451  | 1.076476163 | 0.369225635 | 2.915496813 | 0.003551227 | 0.036496717 |
| ENSG00000197852.9  | FAM212B       | 351.3698221 | 1.0755027   | 0.350508931 | 3.068403126 | 0.002152061 | 0.02484252  |
| ENSG00000176170.13 | SPHK1         | 99.69070075 | 1.074385901 | 0.259752231 | 4.136195086 | 3.53E-05    | 0.000816388 |
| ENSG00000182742.5  | HOXB4         | 296.696961  | 1.072410275 | 0.242653241 | 4.419517624 | 9.89E-06    | 0.000266828 |
| ENSG00000162783.10 | IER5          | 5999.381823 | 1.071717557 | 0.192216157 | 5.575585193 | 2.47E-08    | 1.26E-06    |
| ENSG00000170819.4  | BFSP2         | 59.98389095 | 1.071205527 | 0.26300025  | 4.073020945 | 4.64E-05    | 0.001037296 |
| ENSG00000134897.13 | BIVM          | 264.1089987 | 1.067096583 | 0.314714814 | 3.390677961 | 0.0006972   | 0.01001634  |
| ENSG00000107331.16 | ABCA2         | 4519.645659 | 1.066164343 | 0.23735856  | 4.491788041 | 7.06E-06    | 0.000199903 |
| ENSG00000151725.11 | CENPU         | 144.3535361 | 1.062372642 | 0.252351389 | 4.209894168 | 2.55E-05    | 0.000613091 |
| ENSG00000100599.15 | RIN3          | 1075.408983 | 1.06205882  | 0.239380829 | 4.4366912   | 9.14E-06    | 0.000249221 |
| ENSG00000151116.16 | UEVLD         | 482.3941101 | 1.054358182 | 0.140545641 | 7.501891722 | 6.29E-14    | 9.40E-12    |
| ENSG00000140465.13 | CYP1A1        | 99.0770446  | 1.050705275 | 0.304975706 | 3.445209751 | 0.000570616 | 0.008538421 |

|                    |          |             |             |             |             |             |             |
|--------------------|----------|-------------|-------------|-------------|-------------|-------------|-------------|
| ENSG00000178053.17 | MLF1     | 158.5858301 | 1.047371481 | 0.33389467  | 3.136831984 | 0.00170784  | 0.020559982 |
| ENSG00000116741.7  | RGS2     | 2209.761316 | 1.046040381 | 0.220901952 | 4.735315254 | 2.19E-06    | 7.27E-05    |
| ENSG00000105339.10 | DENND3   | 1529.482935 | 1.045896976 | 0.143557299 | 7.285571557 | 3.20E-13    | 4.28E-11    |
| ENSG00000136193.16 | SCRN1    | 716.847532  | 1.039996039 | 0.202227028 | 5.142715337 | 2.71E-07    | 1.12E-05    |
| ENSG00000105963.13 | ADAP1    | 273.0736729 | 1.039153277 | 0.230840901 | 4.50159947  | 6.74E-06    | 0.000191648 |
| ENSG00000166483.10 | WEE1     | 1569.931093 | 1.038479256 | 0.167755517 | 6.190432788 | 6.00E-10    | 4.28E-08    |
| ENSG00000186654.20 | PRR5     | 1003.978371 | 1.036723196 | 0.16246284  | 6.38129432  | 1.76E-10    | 1.35E-08    |
| ENSG00000155265.10 | GOLGA7B  | 420.875357  | 1.034990848 | 0.187309594 | 5.525562392 | 3.28E-08    | 1.62E-06    |
| ENSG00000179820.15 | MYADM    | 12807.3972  | 1.025483806 | 0.281351843 | 3.644844818 | 0.000267553 | 0.00459257  |
| ENSG00000099282.9  | TSPAN15  | 154.3542954 | 1.020112096 | 0.310975137 | 3.280365458 | 0.001036727 | 0.013826238 |
| ENSG00000100365.14 | NCF4     | 1766.522383 | 1.017622317 | 0.149920429 | 6.787749497 | 1.14E-11    | 1.11E-09    |
| ENSG00000083444.16 | PLOD1    | 282.8408409 | 1.016790975 | 0.280477723 | 3.625211168 | 0.000288725 | 0.004885861 |
| ENSG00000155366.16 | RHOC     | 705.6099362 | 1.008297871 | 0.182480449 | 5.525511791 | 3.29E-08    | 1.62E-06    |
| ENSG00000183688.4  | FAM101B  | 1950.079909 | 1.005888558 | 0.169678653 | 5.92819745  | 3.06E-09    | 1.88E-07    |
| ENSG00000125735.10 | TNFSF14  | 997.4799037 | 1.005337769 | 0.254655286 | 3.947837826 | 7.89E-05    | 0.001632964 |
| ENSG00000232434.2  | C9orf172 | 456.3728532 | 1.004721846 | 0.287369191 | 3.496275445 | 0.000471801 | 0.007264324 |

**Table S7 B: down-regulated genes in intestinal pTh17-cells as compared to cTh17-cells**

| Gene_id            | Gene_name   | baseMean | log2FoldChange | lfcSE    | stat     | pvalue   | padj     |
|--------------------|-------------|----------|----------------|----------|----------|----------|----------|
| ENSG00000182463.15 | TSHZ2       | 222.8105 | -5.52067       | 0.844559 | -6.53674 | 6.29E-11 | 5.19E-09 |
| ENSG00000188404.8  | SELL        | 1880.019 | -5.13659       | 0.516281 | -9.94923 | 2.54E-23 | 1.11E-20 |
| ENSG00000137474.19 | MYO7A       | 587.0363 | -4.32216       | 1.070156 | -4.03882 | 5.37E-05 | 0.001175 |
| ENSG00000138795.9  | LEF1        | 3288.263 | -4.18867       | 0.309699 | -13.525  | 1.11E-41 | 3.20E-38 |
| ENSG00000156299.13 | TIAM1       | 651.0679 | -4.17785       | 0.316414 | -13.2037 | 8.35E-40 | 2.00E-36 |
| ENSG00000124191.17 | TOX2        | 464.7712 | -3.92137       | 0.767166 | -5.11151 | 3.20E-07 | 1.30E-05 |
| ENSG00000126353.3  | CCR7        | 3444.087 | -3.59887       | 0.277949 | -12.948  | 2.41E-38 | 3.46E-35 |
| ENSG00000183813.6  | CCR4        | 2444.444 | -3.35073       | 0.796769 | -4.20539 | 2.61E-05 | 0.000624 |
| ENSG00000182230.11 | FAM153B     | 142.0927 | -3.2529        | 0.347433 | -9.36269 | 7.77E-21 | 2.54E-18 |
| ENSG00000186310.9  | NAP1L3      | 111.2208 | -3.23471       | 0.299692 | -10.7934 | 3.70E-27 | 2.12E-24 |
| ENSG00000118263.14 | KLF7        | 279.9951 | -3.18771       | 0.457999 | -6.96007 | 3.40E-12 | 3.67E-10 |
| ENSG00000008441.16 | NFIX        | 134.2891 | -3.18391       | 0.521714 | -6.10279 | 1.04E-09 | 7.12E-08 |
| ENSG00000263264.1  | CTB-133G6.1 | 417.8211 | -3.17024       | 0.270435 | -11.7227 | 9.75E-32 | 8.74E-29 |
| ENSG00000135925.8  | WNT10A      | 109.0592 | -3.12856       | 0.598457 | -5.22771 | 1.72E-07 | 7.42E-06 |
| ENSG00000204219.9  | TCEA3       | 113.1282 | -3.07699       | 0.331143 | -9.29203 | 1.51E-20 | 4.72E-18 |
| ENSG00000141753.6  | IGFBP4      | 2116.633 | -3.07484       | 0.489598 | -6.28033 | 3.38E-10 | 2.49E-08 |
| ENSG00000182272.11 | B4GALNT4    | 168.0748 | -3.05532       | 0.267664 | -11.4148 | 3.53E-30 | 2.66E-27 |
| ENSG00000132694.18 | ARHGEF11    | 161.6979 | -3.04135       | 0.534799 | -5.68691 | 1.29E-08 | 7.00E-07 |
| ENSG00000160712.12 | IL6R        | 2497.946 | -3.03144       | 0.294124 | -10.3067 | 6.57E-25 | 3.14E-22 |
| ENSG00000104361.9  | NIPAL2      | 69.64933 | -3.00369       | 0.561371 | -5.35064 | 8.76E-08 | 4.02E-06 |
| ENSG00000107281.9  | NPDC1       | 388.1337 | -2.9866        | 0.760222 | -3.9286  | 8.54E-05 | 0.001749 |
| ENSG00000166405.14 | RIC3        | 256.8894 | -2.95868       | 0.286641 | -10.3219 | 5.61E-25 | 2.78E-22 |
| ENSG00000186854.10 | TRABD2A     | 599.6396 | -2.86326       | 0.28954  | -9.88898 | 4.65E-23 | 1.91E-20 |
| ENSG00000170989.8  | S1PR1       | 2606.257 | -2.78647       | 0.309678 | -8.99794 | 2.30E-19 | 6.11E-17 |
| ENSG00000092096.15 | SLC22A17    | 71.74946 | -2.77195       | 0.292135 | -9.48861 | 2.34E-21 | 8.40E-19 |
| ENSG00000173198.5  | CYSLTR1     | 299.2795 | -2.76435       | 0.646718 | -4.27443 | 1.92E-05 | 0.000481 |
| ENSG00000131398.13 | KCNC3       | 263.9192 | -2.73718       | 0.423702 | -6.46015 | 1.05E-10 | 8.34E-09 |
| ENSG00000072110.13 | ACTN1       | 245.9607 | -2.71376       | 0.424606 | -6.39123 | 1.65E-10 | 1.28E-08 |
| ENSG00000185989.10 | RASA3       | 2434.46  | -2.6948        | 0.237086 | -11.3663 | 6.15E-30 | 4.41E-27 |
| ENSG00000172292.14 | CERS6       | 178.5897 | -2.68294       | 0.392668 | -6.83258 | 8.34E-12 | 8.37E-10 |
| ENSG00000080854.14 | IGSF9B      | 378.4805 | -2.65659       | 0.372326 | -7.13513 | 9.67E-13 | 1.13E-10 |
| ENSG00000143869.6  | GDF7        | 123.0776 | -2.64106       | 0.578709 | -4.56371 | 5.03E-06 | 0.000148 |
| ENSG00000135678.11 | CPM         | 93.11924 | -2.62571       | 0.635661 | -4.13068 | 3.62E-05 | 0.000833 |
| ENSG00000103522.15 | IL21R       | 728.9845 | -2.55953       | 0.225397 | -11.3557 | 6.95E-30 | 4.75E-27 |
| ENSG00000116690.12 | PRG4        | 77.33469 | -2.49402       | 0.593313 | -4.20355 | 2.63E-05 | 0.000627 |
| ENSG00000165591.6  | FAAH2       | 336.0419 | -2.47446       | 0.278487 | -8.88539 | 6.37E-19 | 1.66E-16 |
| ENSG00000116106.11 | EPHA4       | 735.8713 | -2.44084       | 0.409981 | -5.95354 | 2.62E-09 | 1.62E-07 |
| ENSG00000166105.15 | GLB1L3      | 271.9393 | -2.4367        | 0.308797 | -7.89095 | 3.00E-15 | 5.18E-13 |
| ENSG00000181847.11 | TIGIT       | 1477.529 | -2.42331       | 0.266553 | -9.09129 | 9.79E-20 | 2.75E-17 |
| ENSG00000163545.8  | NUAK2       | 488.2554 | -2.40287       | 0.276652 | -8.68552 | 3.77E-18 | 9.17E-16 |
| ENSG00000128536.15 | CDHR3       | 74.12517 | -2.38709       | 0.427249 | -5.58712 | 2.31E-08 | 1.19E-06 |
| ENSG00000160856.20 | FCRL3       | 83.05903 | -2.3653        | 0.555152 | -4.26064 | 2.04E-05 | 0.000506 |
| ENSG00000072163.19 | LIMS2       | 98.64089 | -2.34716       | 0.301526 | -7.78429 | 7.01E-15 | 1.16E-12 |
| ENSG00000147408.14 | CSGALNACT1  | 178.8126 | -2.33336       | 0.255712 | -9.12493 | 7.18E-20 | 2.06E-17 |
| ENSG00000196422.10 | PPP1R26     | 61.21193 | -2.26499       | 0.584898 | -3.87245 | 0.000108 | 0.002133 |
| ENSG00000104903.4  | LYL1        | 106.2509 | -2.24988       | 0.309053 | -7.27993 | 3.34E-13 | 4.40E-11 |

|                    |            |          |          |          |          |          |          |
|--------------------|------------|----------|----------|----------|----------|----------|----------|
| ENSG00000126217.20 | MCF2L      | 135.4752 | -2.204   | 0.417542 | -5.27852 | 1.30E-07 | 5.75E-06 |
| ENSG00000180543.4  | TSPYL5     | 63.37924 | -2.20012 | 0.475957 | -4.62251 | 3.79E-06 | 0.000117 |
| ENSG00000050327.14 | ARHGEF5    | 84.13948 | -2.16437 | 0.319014 | -6.78457 | 1.16E-11 | 1.12E-09 |
| ENSG00000132359.14 | RAP1GAP2   | 398.1428 | -2.15762 | 0.366304 | -5.89025 | 3.86E-09 | 2.32E-07 |
| ENSG00000102349.16 | KLF8       | 107.8081 | -2.14795 | 0.470692 | -4.56338 | 5.03E-06 | 0.000148 |
| ENSG00000104689.9  | TNFRSF10A  | 593.5665 | -2.12337 | 0.16194  | -13.1121 | 2.81E-39 | 5.75E-36 |
| ENSG00000006704.10 | GTF2IRD1   | 107.5658 | -2.09425 | 0.396127 | -5.28681 | 1.24E-07 | 5.53E-06 |
| ENSG00000116191.17 | RALGPS2    | 270.7878 | -2.07725 | 0.746185 | -2.78382 | 0.005372 | 0.049513 |
| ENSG00000139193.3  | CD27       | 610.3281 | -2.03345 | 0.271623 | -7.4863  | 7.08E-14 | 1.04E-11 |
| ENSG00000100600.14 | LGMN       | 222.7363 | -2.01703 | 0.496657 | -4.06121 | 4.88E-05 | 0.001081 |
| ENSG00000177469.12 | PTRF       | 66.08229 | -2.00702 | 0.585639 | -3.42706 | 0.00061  | 0.009008 |
| ENSG00000140545.14 | MFGE8      | 364.878  | -2.00208 | 0.295592 | -6.77312 | 1.26E-11 | 1.18E-09 |
| ENSG00000110777.11 | POU2AF1    | 180.8359 | -1.98018 | 0.493376 | -4.01353 | 5.98E-05 | 0.001291 |
| ENSG00000136111.12 | TBC1D4     | 3019.28  | -1.97252 | 0.260374 | -7.57573 | 3.57E-14 | 5.51E-12 |
| ENSG00000163082.9  | SGPP2      | 638.2869 | -1.9719  | 0.361166 | -5.45982 | 4.77E-08 | 2.29E-06 |
| ENSG00000138449.10 | SLC40A1    | 190.647  | -1.94724 | 0.309795 | -6.28558 | 3.27E-10 | 2.42E-08 |
| ENSG00000113645.14 | WWC1       | 75.06796 | -1.94237 | 0.499434 | -3.88913 | 0.000101 | 0.002011 |
| ENSG00000174500.12 | GCSAM      | 183.4009 | -1.93556 | 0.306575 | -6.31351 | 2.73E-10 | 2.04E-08 |
| ENSG00000160255.17 | ITGB2      | 7547.879 | -1.933   | 0.213708 | -9.04505 | 1.50E-19 | 4.05E-17 |
| ENSG00000184557.4  | SOCS3      | 1530.297 | -1.93066 | 0.493528 | -3.91196 | 9.15E-05 | 0.001861 |
| ENSG00000149212.11 | SESN3      | 2247.122 | -1.90943 | 0.341459 | -5.59198 | 2.24E-08 | 1.16E-06 |
| ENSG00000134198.9  | TSPAN2     | 130.1179 | -1.90606 | 0.456003 | -4.17994 | 2.92E-05 | 0.000693 |
| ENSG00000148429.14 | USP6NL     | 138.5034 | -1.89345 | 0.489313 | -3.86962 | 0.000109 | 0.002155 |
| ENSG00000182809.10 | CRIP2      | 77.62271 | -1.86075 | 0.551123 | -3.3763  | 0.000735 | 0.010397 |
| ENSG00000174837.14 | ADGRE1     | 191.6099 | -1.85322 | 0.377038 | -4.9152  | 8.87E-07 | 3.22E-05 |
| ENSG00000146216.11 | TTBK1      | 104.8959 | -1.85235 | 0.614151 | -3.01612 | 0.00256  | 0.028292 |
| ENSG00000160284.14 | SPATC1L    | 44.75997 | -1.84663 | 0.432282 | -4.27181 | 1.94E-05 | 0.000486 |
| ENSG00000204271.11 | SPIN3      | 252.2056 | -1.84129 | 0.196316 | -9.37921 | 6.65E-21 | 2.23E-18 |
| ENSG00000186265.9  | BTLA       | 285.344  | -1.84125 | 0.39053  | -4.71476 | 2.42E-06 | 7.94E-05 |
| ENSG00000047634.14 | SCML1      | 404.9966 | -1.83805 | 0.62299  | -2.95037 | 0.003174 | 0.033465 |
| ENSG00000070526.14 | ST6GALNAC1 | 213.4245 | -1.82581 | 0.321103 | -5.68607 | 1.30E-08 | 7.00E-07 |
| ENSG00000168824.14 | NSG1       | 934.3938 | -1.80735 | 0.248104 | -7.28466 | 3.22E-13 | 4.28E-11 |
| ENSG00000198780.11 | FAM169A    | 141.8927 | -1.80188 | 0.288112 | -6.25409 | 4.00E-10 | 2.91E-08 |
| ENSG00000181804.14 | SLC9A9     | 575.2593 | -1.80149 | 0.318943 | -5.64831 | 1.62E-08 | 8.55E-07 |
| ENSG00000183087.14 | GAS6       | 193.2021 | -1.78852 | 0.34657  | -5.16063 | 2.46E-07 | 1.02E-05 |
| ENSG00000034053.14 | APBA2      | 1300.977 | -1.75081 | 0.220951 | -7.92395 | 2.30E-15 | 4.08E-13 |
| ENSG00000101842.13 | VSIG1      | 244.2266 | -1.73778 | 0.307355 | -5.65397 | 1.57E-08 | 8.33E-07 |
| ENSG00000137507.11 | LRRC32     | 141.6769 | -1.73583 | 0.51779  | -3.35238 | 0.000801 | 0.011163 |
| ENSG00000155970.11 | MICU3      | 114.1202 | -1.71868 | 0.253252 | -6.78645 | 1.15E-11 | 1.11E-09 |
| ENSG00000100311.16 | PDGFB      | 105.6094 | -1.71534 | 0.407432 | -4.21013 | 2.55E-05 | 0.000613 |
| ENSG00000101004.14 | NINL       | 243.1686 | -1.70996 | 0.22842  | -7.48605 | 7.10E-14 | 1.04E-11 |
| ENSG00000065717.14 | TLE2       | 105.1692 | -1.70692 | 0.298366 | -5.72088 | 1.06E-08 | 5.83E-07 |
| ENSG00000035862.12 | TIMP2      | 161.7639 | -1.70292 | 0.250107 | -6.80875 | 9.85E-12 | 9.74E-10 |
| ENSG00000177383.4  | MAGEF1     | 260.1802 | -1.68051 | 0.2497   | -6.73011 | 1.70E-11 | 1.54E-09 |
| ENSG00000155099.7  | TMEM55A    | 119.7184 | -1.65693 | 0.351701 | -4.71119 | 2.46E-06 | 8.02E-05 |
| ENSG00000157570.11 | TSPAN18    | 329.5201 | -1.65169 | 0.332866 | -4.96203 | 6.98E-07 | 2.63E-05 |
| ENSG00000188266.13 | HYKK       | 29.42185 | -1.64998 | 0.462872 | -3.56466 | 0.000364 | 0.005904 |
| ENSG00000116771.5  | AGMAT      | 120.8627 | -1.63861 | 0.432965 | -3.78463 | 0.000154 | 0.002899 |



|                    |          |          |          |          |          |          |          |
|--------------------|----------|----------|----------|----------|----------|----------|----------|
| ENSG00000186827.10 | TNFRSF4  | 734.1317 | -1.63009 | 0.522185 | -3.12166 | 0.001798 | 0.021483 |
| ENSG00000184613.10 | NELL2    | 3117.828 | -1.60464 | 0.345021 | -4.65085 | 3.31E-06 | 0.000104 |
| ENSG00000067840.12 | PDZD4    | 109.1711 | -1.59826 | 0.496512 | -3.21898 | 0.001286 | 0.016527 |
| ENSG00000110987.8  | BCL7A    | 29.04993 | -1.59574 | 0.470398 | -3.39232 | 0.000693 | 0.009985 |
| ENSG00000114948.12 | ADAM23   | 1107.028 | -1.59471 | 0.339432 | -4.69818 | 2.62E-06 | 8.46E-05 |
| ENSG00000198814.12 | GK       | 412.2895 | -1.58958 | 0.419308 | -3.79096 | 0.00015  | 0.002837 |
| ENSG00000172794.19 | RAB37    | 2650.108 | -1.58408 | 0.226418 | -6.99626 | 2.63E-12 | 2.90E-10 |
| ENSG00000135821.17 | GLUL     | 2763.942 | -1.58108 | 0.302394 | -5.22853 | 1.71E-07 | 7.41E-06 |
| ENSG00000196218.12 | RYR1     | 1591.154 | -1.56879 | 0.291474 | -5.38225 | 7.36E-08 | 3.43E-06 |
| ENSG00000203710.10 | CR1      | 157.6703 | -1.5634  | 0.428908 | -3.64508 | 0.000267 | 0.004593 |
| ENSG00000104427.11 | ZC2HC1A  | 135.4937 | -1.56239 | 0.443158 | -3.52559 | 0.000423 | 0.006641 |
| ENSG00000150347.14 | ARID5B   | 2242.036 | -1.53791 | 0.24541  | -6.2667  | 3.69E-10 | 2.70E-08 |
| ENSG00000170677.5  | SOCS6    | 69.13637 | -1.52374 | 0.355345 | -4.28806 | 1.80E-05 | 0.000456 |
| ENSG00000146776.14 | ATXN7L1  | 880.8262 | -1.51987 | 0.190079 | -7.99597 | 1.29E-15 | 2.34E-13 |
| ENSG00000116983.12 | HPCAL4   | 1056.309 | -1.51466 | 0.258026 | -5.8702  | 4.35E-09 | 2.57E-07 |
| ENSG00000143502.14 | SUSD4    | 75.50415 | -1.51366 | 0.243211 | -6.22367 | 4.86E-10 | 3.52E-08 |
| ENSG00000088256.8  | GNA11    | 75.44225 | -1.51347 | 0.45841  | -3.30158 | 0.000961 | 0.013053 |
| ENSG00000223547.9  | ZNF844   | 148.7124 | -1.5045  | 0.32067  | -4.69174 | 2.71E-06 | 8.72E-05 |
| ENSG00000152782.16 | PANK1    | 149.4055 | -1.50396 | 0.281236 | -5.34767 | 8.91E-08 | 4.07E-06 |
| ENSG00000125430.8  | HS3ST3B1 | 308.1363 | -1.50178 | 0.406794 | -3.69174 | 0.000223 | 0.003965 |
| ENSG00000186462.8  | NAP1L2   | 237.3913 | -1.49897 | 0.18732  | -8.00222 | 1.22E-15 | 2.25E-13 |
| ENSG00000154589.6  | LY96     | 249.2703 | -1.49234 | 0.392147 | -3.80558 | 0.000141 | 0.002703 |
| ENSG00000172824.14 | CES4A    | 167.7661 | -1.48631 | 0.200395 | -7.41689 | 1.20E-13 | 1.65E-11 |
| ENSG00000148053.15 | NTRK2    | 276.1923 | -1.48323 | 0.447985 | -3.31089 | 0.00093  | 0.012674 |
| ENSG00000152969.17 | JAKMIP1  | 274.5123 | -1.47667 | 0.38897  | -3.79637 | 0.000147 | 0.002783 |
| ENSG00000077782.19 | FGFR1    | 123.9127 | -1.46229 | 0.460389 | -3.1762  | 0.001492 | 0.018553 |
| ENSG00000164684.13 | ZNF704   | 85.42108 | -1.45831 | 0.428535 | -3.40302 | 0.000666 | 0.00966  |
| ENSG00000081059.19 | TCF7     | 18321.76 | -1.45038 | 0.188665 | -7.68756 | 1.50E-14 | 2.42E-12 |
| ENSG00000105699.16 | LSR      | 1125.748 | -1.45031 | 0.288805 | -5.02177 | 5.12E-07 | 1.99E-05 |
| ENSG00000221890.2  | NPTXR    | 749.4114 | -1.44795 | 0.273442 | -5.29528 | 1.19E-07 | 5.30E-06 |
| ENSG00000151715.7  | TMEM45B  | 365.7654 | -1.43903 | 0.233235 | -6.16985 | 6.84E-10 | 4.86E-08 |
| ENSG00000089159.16 | PXN      | 2184.12  | -1.42528 | 0.150726 | -9.45607 | 3.20E-21 | 1.12E-18 |
| ENSG00000070087.13 | PFN2     | 101.5347 | -1.41952 | 0.380698 | -3.72872 | 0.000192 | 0.0035   |
| ENSG00000104177.17 | MYEF2    | 627.8424 | -1.4148  | 0.23717  | -5.96532 | 2.44E-09 | 1.52E-07 |
| ENSG00000142303.13 | ADAMTS10 | 425.8086 | -1.41324 | 0.400938 | -3.52484 | 0.000424 | 0.006653 |
| ENSG00000182010.10 | RTKN2    | 284.3838 | -1.39616 | 0.305987 | -4.56282 | 5.05E-06 | 0.000148 |
| ENSG00000173218.14 | VANGL1   | 108.235  | -1.39583 | 0.440207 | -3.17085 | 0.00152  | 0.018739 |
| ENSG00000140511.11 | HAPLN3   | 877.291  | -1.36495 | 0.24677  | -5.53127 | 3.18E-08 | 1.59E-06 |
| ENSG00000117318.8  | ID3      | 57.66296 | -1.36245 | 0.320837 | -4.24656 | 2.17E-05 | 0.000533 |
| ENSG00000167371.17 | PRRT2    | 63.36068 | -1.35741 | 0.270534 | -5.01752 | 5.23E-07 | 2.03E-05 |
| ENSG00000181754.6  | AMIGO1   | 532.645  | -1.33517 | 0.261035 | -5.11491 | 3.14E-07 | 1.28E-05 |
| ENSG00000038382.17 | TRIO     | 345.9137 | -1.32236 | 0.28838  | -4.58546 | 4.53E-06 | 0.000137 |
| ENSG00000163864.15 | NMNAT3   | 91.80017 | -1.32185 | 0.471583 | -2.80301 | 0.005063 | 0.047361 |
| ENSG00000083290.19 | ULK2     | 355.4047 | -1.31923 | 0.300531 | -4.38968 | 1.14E-05 | 0.000301 |
| ENSG00000030419.16 | IKZF2    | 228.9082 | -1.31306 | 0.356966 | -3.67841 | 0.000235 | 0.004143 |
| ENSG00000167037.18 | SGSM1    | 113.9675 | -1.31274 | 0.229234 | -5.72662 | 1.02E-08 | 5.68E-07 |
| ENSG00000136379.11 | ABHD17C  | 72.35161 | -1.30912 | 0.364422 | -3.59232 | 0.000328 | 0.005431 |
| ENSG00000179242.15 | CDH4     | 87.58347 | -1.30911 | 0.443814 | -2.94968 | 0.003181 | 0.033516 |

|                    |          |          |          |          |          |          |          |
|--------------------|----------|----------|----------|----------|----------|----------|----------|
| ENSG00000159640.15 | ACE      | 769.2801 | -1.30817 | 0.128845 | -10.1531 | 3.21E-24 | 1.44E-21 |
| ENSG00000105173.13 | CCNE1    | 72.08675 | -1.29637 | 0.432987 | -2.99402 | 0.002753 | 0.030022 |
| ENSG00000111879.18 | FAM184A  | 154.7897 | -1.2929  | 0.309126 | -4.18243 | 2.88E-05 | 0.000686 |
| ENSG00000129422.14 | MTUS1    | 144.0066 | -1.27941 | 0.292496 | -4.37411 | 1.22E-05 | 0.00032  |
| ENSG00000059915.16 | PSD      | 387.3031 | -1.27324 | 0.26341  | -4.8337  | 1.34E-06 | 4.66E-05 |
| ENSG00000054219.10 | LY75     | 382.1652 | -1.2715  | 0.281332 | -4.51958 | 6.20E-06 | 0.000178 |
| ENSG00000114812.12 | VIPR1    | 414.2806 | -1.2586  | 0.232298 | -5.41804 | 6.03E-08 | 2.83E-06 |
| ENSG00000132122.11 | SPATA6   | 38.75707 | -1.25562 | 0.326117 | -3.85022 | 0.000118 | 0.002304 |
| ENSG00000187231.13 | SESTD1   | 212.8932 | -1.25394 | 0.31279  | -4.00889 | 6.10E-05 | 0.00131  |
| ENSG00000188868.13 | ZNF563   | 69.40821 | -1.24091 | 0.255068 | -4.865   | 1.14E-06 | 4.09E-05 |
| ENSG00000196329.11 | GIMAP5   | 834.2817 | -1.23912 | 0.224048 | -5.53062 | 3.19E-08 | 1.59E-06 |
| ENSG00000196381.10 | ZNF781   | 39.84237 | -1.23675 | 0.399211 | -3.098   | 0.001948 | 0.022823 |
| ENSG00000174255.6  | ZNF80    | 70.66222 | -1.23303 | 0.312901 | -3.94065 | 8.13E-05 | 0.001678 |
| ENSG00000073849.14 | ST6GAL1  | 4344.256 | -1.22975 | 0.094765 | -12.9769 | 1.65E-38 | 2.64E-35 |
| ENSG00000275793.1  | RIMBP3   | 78.9871  | -1.22769 | 0.432235 | -2.84033 | 0.004507 | 0.043668 |
| ENSG00000101224.17 | CDC25B   | 8090.983 | -1.21867 | 0.180968 | -6.73418 | 1.65E-11 | 1.51E-09 |
| ENSG00000123454.10 | DBH      | 222.3375 | -1.21276 | 0.367531 | -3.29974 | 0.000968 | 0.013114 |
| ENSG00000266338.6  | NBPF15   | 1690.454 | -1.20557 | 0.167399 | -7.20181 | 5.94E-13 | 7.41E-11 |
| ENSG00000144115.16 | THNSL2   | 40.32142 | -1.19745 | 0.333819 | -3.58712 | 0.000334 | 0.005528 |
| ENSG00000197457.9  | STMN3    | 1552.451 | -1.19346 | 0.196682 | -6.06797 | 1.30E-09 | 8.69E-08 |
| ENSG00000008311.14 | AASS     | 147.4298 | -1.19069 | 0.277493 | -4.29089 | 1.78E-05 | 0.000451 |
| ENSG00000123453.17 | SARDH    | 540.0202 | -1.1809  | 0.247841 | -4.76473 | 1.89E-06 | 6.33E-05 |
| ENSG00000163235.15 | TGFA     | 260.4263 | -1.16509 | 0.260056 | -4.48016 | 7.46E-06 | 0.000209 |
| ENSG00000121989.14 | ACVR2A   | 157.9084 | -1.15246 | 0.268503 | -4.29215 | 1.77E-05 | 0.000451 |
| ENSG00000119771.14 | KLHL29   | 85.80779 | -1.15026 | 0.358894 | -3.205   | 0.001351 | 0.017182 |
| ENSG00000136026.13 | CKAP4    | 397.6188 | -1.13493 | 0.267064 | -4.24967 | 2.14E-05 | 0.000528 |
| ENSG00000109452.12 | INPP4B   | 1811.665 | -1.12944 | 0.148005 | -7.6311  | 2.33E-14 | 3.71E-12 |
| ENSG00000198520.10 | C1orf228 | 378.4097 | -1.12901 | 0.245304 | -4.60251 | 4.17E-06 | 0.000127 |
| ENSG00000104880.17 | ARHGEF18 | 231.4287 | -1.1253  | 0.278178 | -4.04524 | 5.23E-05 | 0.001149 |
| ENSG00000141540.10 | TTYH2    | 641.3589 | -1.12398 | 0.360668 | -3.11637 | 0.001831 | 0.021718 |
| ENSG00000147799.11 | ARHGAP39 | 50.07748 | -1.10762 | 0.352831 | -3.13924 | 0.001694 | 0.020426 |
| ENSG00000135541.20 | AHI1     | 300.9706 | -1.10421 | 0.184157 | -5.99605 | 2.02E-09 | 1.28E-07 |
| ENSG00000147457.13 | CHMP7    | 4495.071 | -1.10238 | 0.19907  | -5.53766 | 3.07E-08 | 1.54E-06 |
| ENSG00000228594.3  | FNDC10   | 69.306   | -1.09898 | 0.285551 | -3.84864 | 0.000119 | 0.002313 |
| ENSG00000188322.4  | SBK1     | 419.9797 | -1.09872 | 0.272675 | -4.0294  | 5.59E-05 | 0.001216 |
| ENSG00000104783.11 | KCNN4    | 969.466  | -1.09587 | 0.160184 | -6.84131 | 7.85E-12 | 7.99E-10 |
| ENSG00000133069.15 | TMCC2    | 111.4865 | -1.09075 | 0.365591 | -2.98353 | 0.002849 | 0.03093  |
| ENSG00000184602.5  | SNN      | 529.6724 | -1.08911 | 0.177245 | -6.14468 | 8.01E-10 | 5.61E-08 |
| ENSG00000145916.18 | RMND5B   | 1002.632 | -1.08776 | 0.128606 | -8.45804 | 2.72E-17 | 5.91E-15 |
| ENSG00000171621.13 | SPSB1    | 656.2905 | -1.07846 | 0.232539 | -4.63777 | 3.52E-06 | 0.00011  |
| ENSG00000101493.10 | ZNF516   | 136.201  | -1.07479 | 0.326325 | -3.29362 | 0.000989 | 0.013327 |
| ENSG00000066294.14 | CD84     | 2662.887 | -1.06264 | 0.221362 | -4.80046 | 1.58E-06 | 5.40E-05 |
| ENSG00000173258.12 | ZNF483   | 150.0094 | -1.05499 | 0.216234 | -4.87892 | 1.07E-06 | 3.83E-05 |
| ENSG00000125089.16 | SH3TC1   | 2883.478 | -1.05294 | 0.14537  | -7.24322 | 4.38E-13 | 5.56E-11 |
| ENSG00000164251.4  | F2RL1    | 184.7892 | -1.04991 | 0.333464 | -3.1485  | 0.001641 | 0.019957 |
| ENSG00000179144.4  | GIMAP7   | 2495.298 | -1.04706 | 0.341102 | -3.06963 | 0.002143 | 0.024783 |
| ENSG00000148700.14 | ADD3     | 4972.308 | -1.04679 | 0.124849 | -8.38445 | 5.10E-17 | 1.06E-14 |
| ENSG00000157978.11 | LDLRAP1  | 2474.947 | -1.04658 | 0.187879 | -5.57051 | 2.54E-08 | 1.29E-06 |

|                    |          |          |          |          |          |          |          |
|--------------------|----------|----------|----------|----------|----------|----------|----------|
| ENSG00000171291.8  | ZNF439   | 255.945  | -1.04201 | 0.199087 | -5.23396 | 1.66E-07 | 7.21E-06 |
| ENSG00000140092.14 | FBLN5    | 236.4508 | -1.04201 | 0.228066 | -4.56891 | 4.90E-06 | 0.000146 |
| ENSG00000165821.11 | SALL2    | 229.6505 | -1.04089 | 0.208939 | -4.98179 | 6.30E-07 | 2.40E-05 |
| ENSG00000168646.12 | AXIN2    | 243.0691 | -1.04021 | 0.227683 | -4.56869 | 4.91E-06 | 0.000146 |
| ENSG00000197077.13 | KIAA1671 | 2062.306 | -1.03964 | 0.21203  | -4.90325 | 9.43E-07 | 3.42E-05 |
| ENSG00000091409.14 | ITGA6    | 771.2774 | -1.03356 | 0.23775  | -4.34727 | 1.38E-05 | 0.000358 |
| ENSG00000097096.8  | SYDE2    | 69.17397 | -1.02889 | 0.326126 | -3.15488 | 0.001606 | 0.019569 |
| ENSG00000197321.14 | SVIL     | 233.0175 | -1.02777 | 0.321268 | -3.19911 | 0.001379 | 0.017414 |
| ENSG00000183386.9  | FHL3     | 102.1926 | -1.02738 | 0.319454 | -3.21604 | 0.0013   | 0.016643 |
| ENSG00000116299.16 | KIAA1324 | 787.1845 | -1.02627 | 0.21157  | -4.85075 | 1.23E-06 | 4.30E-05 |
| ENSG00000181690.7  | PLAG1    | 477.8552 | -1.02573 | 0.221633 | -4.62807 | 3.69E-06 | 0.000114 |
| ENSG00000175643.8  | RMI2     | 77.68171 | -1.0224  | 0.360419 | -2.83669 | 0.004558 | 0.043913 |
| ENSG00000134352.19 | IL6ST    | 3178.975 | -1.0193  | 0.223745 | -4.55563 | 5.22E-06 | 0.000152 |
| ENSG00000167861.15 | HID1     | 245.8288 | -1.0174  | 0.301884 | -3.37017 | 0.000751 | 0.01061  |
| ENSG00000123600.18 | METTL8   | 729.1607 | -1.01135 | 0.195736 | -5.16689 | 2.38E-07 | 9.96E-06 |
| ENSG00000110665.11 | C11orf21 | 205.1023 | -1.00956 | 0.299689 | -3.36869 | 0.000755 | 0.010647 |
| ENSG00000134146.11 | DPH6     | 101.551  | -1.00947 | 0.271832 | -3.71359 | 0.000204 | 0.003679 |
| ENSG00000102109.8  | PCSK1N   | 46.79572 | -1.00858 | 0.360901 | -2.79462 | 0.005196 | 0.048387 |
| ENSG00000142192.20 | APP      | 1038.177 | -1.00554 | 0.201589 | -4.98807 | 6.10E-07 | 2.33E-05 |

**Table S8 A: up-regulated genes in intestinal pTh17-cells as compared to CCR5<sup>+</sup>Th1/17-cells**

| Gene_id            | Gene_name | baseMean    | log2FoldChange | lfcSE       | stat        | pvalue      | padj        |
|--------------------|-----------|-------------|----------------|-------------|-------------|-------------|-------------|
| ENSG00000181409.11 | AATK      | 383.4450957 | 2.975189799    | 0.354441202 | 8.39402921  | 4.70E-17    | 2.13E-14    |
| ENSG00000092068.19 | SLC7A8    | 244.0343169 | 2.779564924    | 0.384184846 | 7.234967635 | 4.66E-13    | 1.17E-10    |
| ENSG00000115594.11 | IL1R1     | 941.8105023 | 2.682483342    | 0.206484049 | 12.99123762 | 1.37E-38    | 2.76E-35    |
| ENSG00000129521.13 | EGLN3     | 470.0464236 | 2.359275877    | 0.627523628 | 3.759660626 | 0.000170144 | 0.004904192 |
| ENSG00000181264.8  | TMEM136   | 92.81799674 | 2.337038176    | 0.362962349 | 6.438789534 | 1.20E-10    | 1.95E-08    |
| ENSG00000131459.12 | GFPT2     | 1068.588703 | 2.181049129    | 0.356993069 | 6.109499925 | 9.99E-10    | 1.36E-07    |
| ENSG00000104267.9  | CA2       | 391.4859723 | 2.150718436    | 0.311534703 | 6.903623955 | 5.07E-12    | 1.08E-09    |
| ENSG00000130202.9  | NECTIN2   | 128.8341785 | 2.000480004    | 0.463575703 | 4.315325395 | 1.59E-05    | 0.000746587 |
| ENSG00000187796.13 | CARD9     | 127.2857791 | 1.975217172    | 0.381998039 | 5.170752129 | 2.33E-07    | 1.85E-05    |
| ENSG00000173114.12 | LRRN3     | 1483.275348 | 1.923123691    | 0.265832465 | 7.234344727 | 4.68E-13    | 1.17E-10    |
| ENSG00000104951.15 | IL4I1     | 1656.752857 | 1.890693352    | 0.281680007 | 6.712202877 | 1.92E-11    | 3.75E-09    |
| ENSG00000164056.10 | SPRY1     | 910.7642979 | 1.880638409    | 0.255788627 | 7.352314406 | 1.95E-13    | 5.50E-11    |
| ENSG00000155629.14 | PIK3AP1   | 473.2938346 | 1.852788674    | 0.412089848 | 4.496079393 | 6.92E-06    | 0.0003606   |
| ENSG00000154917.10 | RAB6B     | 408.956532  | 1.836007836    | 0.329324359 | 5.5750745   | 2.47E-08    | 2.49E-06    |
| ENSG00000140470.13 | ADAMTS17  | 118.2575966 | 1.833209231    | 0.383681104 | 4.777950265 | 1.77E-06    | 0.000108776 |
| ENSG00000120549.17 | KIAA1217  | 283.8505954 | 1.816266964    | 0.229371426 | 7.918453462 | 2.40E-15    | 9.14E-13    |
| ENSG00000130635.15 | COL5A1    | 2128.890246 | 1.779929184    | 0.249649503 | 7.129712499 | 1.01E-12    | 2.44E-10    |
| ENSG00000143502.14 | SUSD4     | 75.50415335 | 1.777899278    | 0.30198897  | 5.887298735 | 3.93E-09    | 4.80E-07    |
| ENSG00000062524.15 | LTK       | 2387.549681 | 1.776961066    | 0.314470049 | 5.650652809 | 1.60E-08    | 1.67E-06    |
| ENSG00000109906.13 | ZBTB16    | 110.4745926 | 1.76831676     | 0.455604868 | 3.881250806 | 0.000103921 | 0.003284825 |
| ENSG00000173926.5  | MARCH3    | 172.2802721 | 1.725486263    | 0.303033777 | 5.694039381 | 1.24E-08    | 1.35E-06    |
| ENSG00000178053.17 | MLF1      | 158.5858301 | 1.722939464    | 0.341500254 | 5.04520698  | 4.53E-07    | 3.32E-05    |
| ENSG00000157404.15 | KIT       | 2195.429181 | 1.700315942    | 0.489965435 | 3.470277329 | 0.000519921 | 0.011589877 |
| ENSG00000129654.7  | FOXJ1     | 110.5753211 | 1.693670249    | 0.433679152 | 3.905353168 | 9.41E-05    | 0.003035413 |
| ENSG00000134317.17 | GRHL1     | 34.8634498  | 1.692861747    | 0.540989884 | 3.129192976 | 0.001752871 | 0.02928253  |
| ENSG00000196914.8  | ARHGEF12  | 2527.702269 | 1.687583167    | 0.185509091 | 9.097037544 | 9.28E-20    | 5.44E-17    |
| ENSG00000162772.16 | ATF3      | 2146.841961 | 1.679510874    | 0.564438555 | 2.975542437 | 0.002924709 | 0.042324027 |
| ENSG00000137462.6  | TLR2      | 215.921105  | 1.665623476    | 0.236950834 | 7.029405415 | 2.07E-12    | 4.78E-10    |
| ENSG00000080573.6  | COL5A3    | 7483.060162 | 1.655555147    | 0.48811199  | 3.391752673 | 0.000694471 | 0.01466731  |
| ENSG00000134253.9  | TRIM45    | 139.5286997 | 1.646244154    | 0.288358678 | 5.709015461 | 1.14E-08    | 1.26E-06    |
| ENSG00000063438.16 | AHRR      | 1698.216035 | 1.615493632    | 0.284298707 | 5.682381221 | 1.33E-08    | 1.42E-06    |
| ENSG00000134256.12 | CD101     | 723.351847  | 1.572144488    | 0.364362741 | 4.314778412 | 1.60E-05    | 0.000746587 |
| ENSG00000187479.5  | C11orf96  | 108.402774  | 1.567753037    | 0.422030251 | 3.714788295 | 0.000203374 | 0.005599329 |
| ENSG00000071539.13 | TRIP13    | 44.72352397 | 1.566317297    | 0.523772558 | 2.990453154 | 0.002785639 | 0.041034256 |
| ENSG00000121297.6  | TSHZ3     | 43.39832752 | 1.553622104    | 0.3934315   | 3.948901155 | 7.85E-05    | 0.002641943 |
| ENSG00000215045.8  | GRID2IP   | 73.59028093 | 1.51152356     | 0.312883432 | 4.830947906 | 1.36E-06    | 8.61E-05    |
| ENSG00000140465.13 | CYP1A1    | 99.0770446  | 1.493798119    | 0.310571464 | 4.809837001 | 1.51E-06    | 9.49E-05    |
| ENSG00000029534.19 | ANK1      | 3723.584082 | 1.470849826    | 0.138407748 | 10.6269327  | 2.23E-26    | 2.42E-23    |
| ENSG00000167291.15 | TBC1D16   | 329.0257259 | 1.467635414    | 0.236230805 | 6.212718178 | 5.21E-10    | 7.32E-08    |
| ENSG00000177875.4  | CCDC184   | 369.4784195 | 1.447439105    | 0.317701254 | 4.555975422 | 5.21E-06    | 0.000283183 |
| ENSG00000186654.20 | PRR5      | 1003.978371 | 1.446432824    | 0.1635054   | 8.846391791 | 9.04E-19    | 4.71E-16    |
| ENSG00000135144.7  | DTX1      | 867.1525706 | 1.439874262    | 0.255305458 | 5.63980994  | 1.70E-08    | 1.75E-06    |
| ENSG00000275395.4  | FCGBP     | 166.1817375 | 1.408864673    | 0.396980846 | 3.548948738 | 0.000386772 | 0.009315651 |
| ENSG00000139200.13 | PIANP     | 299.3338836 | 1.399399514    | 0.32858597  | 4.258853517 | 2.05E-05    | 0.000906036 |
| ENSG00000145990.10 | GFOD1     | 164.6112713 | 1.3799319      | 0.346966241 | 3.977135914 | 6.98E-05    | 0.002392946 |
| ENSG00000100906.10 | NFKBIA    | 21709.8045  | 1.366980167    | 0.344704492 | 3.965658118 | 7.32E-05    | 0.002480826 |

|                    |           |             |             |             |             |             |             |
|--------------------|-----------|-------------|-------------|-------------|-------------|-------------|-------------|
| ENSG00000204161.13 | C10orf128 | 818.7964231 | 1.362827194 | 0.303628038 | 4.48847611  | 7.17E-06    | 0.000372331 |
| ENSG00000157985.18 | AGAP1     | 111.1083272 | 1.350469682 | 0.367226716 | 3.677482115 | 0.000235548 | 0.006272578 |
| ENSG00000111817.16 | DSE       | 1598.554781 | 1.345742587 | 0.190117389 | 7.078482386 | 1.46E-12    | 3.47E-10    |
| ENSG00000125266.6  | EFNB2     | 33.14653777 | 1.34357353  | 0.453439127 | 2.963073654 | 0.003045837 | 0.043660893 |
| ENSG00000196872.11 | KIAA1211L | 107.3875195 | 1.335637245 | 0.244415825 | 5.464610338 | 4.64E-08    | 4.41E-06    |
| ENSG00000206013.2  | IFITM5    | 175.5237576 | 1.31939425  | 0.432262278 | 3.052300231 | 0.002270948 | 0.03525735  |
| ENSG00000142949.16 | PTPRF     | 128.907957  | 1.315599479 | 0.264761293 | 4.969002316 | 6.73E-07    | 4.64E-05    |
| ENSG00000182511.11 | FES       | 583.2106114 | 1.311129512 | 0.362103379 | 3.620870691 | 0.000293613 | 0.007509025 |
| ENSG00000174871.10 | CNIH2     | 176.0716696 | 1.305104242 | 0.35853101  | 3.640143268 | 0.000272486 | 0.007071575 |
| ENSG00000143845.14 | ETNK2     | 83.50787458 | 1.294816317 | 0.26486304  | 4.888625895 | 1.02E-06    | 6.63E-05    |
| ENSG00000215529.12 | EFCAB8    | 107.557233  | 1.29410888  | 0.374322598 | 3.457202124 | 0.000545815 | 0.012033602 |
| ENSG00000125726.10 | CD70      | 216.937412  | 1.291461935 | 0.21359033  | 6.046443837 | 1.48E-09    | 1.95E-07    |
| ENSG00000090104.11 | RGS1      | 8178.659776 | 1.284051488 | 0.307261896 | 4.179013102 | 2.93E-05    | 0.001222017 |
| ENSG00000119917.13 | IFIT3     | 355.5429442 | 1.274417747 | 0.365617674 | 3.485656845 | 0.00049093  | 0.011155569 |
| ENSG00000076706.15 | MCAM      | 351.4856969 | 1.272828605 | 0.275600644 | 4.618380366 | 3.87E-06    | 0.000216732 |
| ENSG00000143036.16 | SLC44A3   | 133.3318833 | 1.271870096 | 0.357911487 | 3.553588364 | 0.000380014 | 0.009168559 |
| ENSG00000137959.15 | IFI44L    | 1291.937595 | 1.262920089 | 0.283988469 | 4.447082286 | 8.70E-06    | 0.000438842 |
| ENSG00000143434.15 | SEMA6C    | 701.3887952 | 1.254106922 | 0.159472247 | 7.864107653 | 3.72E-15    | 1.34E-12    |
| ENSG00000148426.12 | PROSER2   | 158.5767043 | 1.253552261 | 0.344197856 | 3.641952557 | 0.000270578 | 0.007035027 |
| ENSG00000135898.9  | GPR55     | 730.9814874 | 1.248906155 | 0.314647287 | 3.969225882 | 7.21E-05    | 0.002455811 |
| ENSG00000050165.17 | DKK3      | 352.1518506 | 1.238901247 | 0.283592176 | 4.368601654 | 1.25E-05    | 0.000608608 |
| ENSG00000154240.16 | CEP112    | 100.3950281 | 1.232301885 | 0.33050334  | 3.728561058 | 0.000192576 | 0.005406742 |
| ENSG00000115896.15 | PLCL1     | 1030.621067 | 1.226113969 | 0.159515504 | 7.686487781 | 1.51E-14    | 4.83E-12    |
| ENSG00000170819.4  | BFSP2     | 59.98389095 | 1.222705214 | 0.268444705 | 4.554774939 | 5.24E-06    | 0.00028371  |
| ENSG00000102870.5  | ZNF629    | 238.1443119 | 1.216489033 | 0.362524713 | 3.355603053 | 0.000791921 | 0.016285648 |
| ENSG00000186603.5  | HPDL      | 39.48564889 | 1.207568018 | 0.388551567 | 3.107870667 | 0.001884405 | 0.030928871 |
| ENSG00000189420.8  | ZFP92     | 450.1593034 | 1.207026535 | 0.269129927 | 4.484921276 | 7.29E-06    | 0.000377201 |
| ENSG00000183570.16 | PCBP3     | 160.2666008 | 1.198613916 | 0.271579225 | 4.413496347 | 1.02E-05    | 0.000502005 |
| ENSG00000005020.12 | SKAP2     | 1186.518067 | 1.190588728 | 0.200972845 | 5.924127354 | 3.14E-09    | 3.91E-07    |
| ENSG00000177191.2  | B3GNT8    | 80.18055274 | 1.188499883 | 0.323216742 | 3.677098761 | 0.000235902 | 0.006272578 |
| ENSG00000102109.8  | PCSK1N    | 46.79571924 | 1.181623199 | 0.40400298  | 2.924788326 | 0.003446906 | 0.047767665 |
| ENSG00000144802.11 | NFKBIZ    | 5872.263938 | 1.181051221 | 0.275906981 | 4.280613764 | 1.86E-05    | 0.000843443 |
| ENSG00000169026.12 | MFSD7     | 80.59086347 | 1.179626478 | 0.338080603 | 3.489187097 | 0.000484492 | 0.011045159 |
| ENSG00000095397.13 | WHRN      | 1065.724677 | 1.177924401 | 0.243605209 | 4.835382659 | 1.33E-06    | 8.49E-05    |
| ENSG00000115009.11 | CCL20     | 1051.81954  | 1.175672372 | 0.272076003 | 4.321117474 | 1.55E-05    | 0.000732758 |
| ENSG00000083457.11 | ITGAE     | 4213.774947 | 1.168396352 | 0.278680568 | 4.192600733 | 2.76E-05    | 0.001164878 |
| ENSG00000155265.10 | GOLGA7B   | 420.875357  | 1.166098464 | 0.188217713 | 6.19547674  | 5.81E-10    | 8.09E-08    |
| ENSG00000041515.15 | MYO16     | 493.7847694 | 1.150980691 | 0.349799832 | 3.290398063 | 0.001000457 | 0.019461089 |
| ENSG00000165030.3  | NFIL3     | 424.442677  | 1.148537465 | 0.288908169 | 3.975441299 | 7.02E-05    | 0.002404186 |
| ENSG00000177602.5  | GSG2      | 538.087807  | 1.137758967 | 0.365350146 | 3.114160426 | 0.001844692 | 0.030490519 |
| ENSG00000198816.6  | ZNF358    | 128.1982335 | 1.136460278 | 0.240496583 | 4.725473695 | 2.30E-06    | 0.000136256 |
| ENSG00000167613.15 | LAIR1     | 505.5703063 | 1.131412909 | 0.315672402 | 3.584136283 | 0.000338195 | 0.008321005 |
| ENSG00000174885.12 | NLRP6     | 2216.949326 | 1.127625316 | 0.219995085 | 5.12568412  | 2.96E-07    | 2.30E-05    |
| ENSG00000184545.10 | DUSP8     | 517.8817338 | 1.127050765 | 0.339009295 | 3.324542372 | 0.000885638 | 0.017770871 |
| ENSG00000221869.4  | CEBPD     | 1000.596222 | 1.124977469 | 0.349569281 | 3.218181719 | 0.001290061 | 0.023293956 |
| ENSG00000076604.14 | TRAF4     | 1981.345944 | 1.122626532 | 0.165018181 | 6.803047556 | 1.02E-11    | 2.09E-09    |
| ENSG00000198846.5  | TOX       | 645.3171028 | 1.119776942 | 0.259788536 | 4.310340084 | 1.63E-05    | 0.000756703 |
| ENSG00000114631.10 | PODXL2    | 187.3264063 | 1.119270236 | 0.260969339 | 4.288895542 | 1.80E-05    | 0.000822718 |

|                    |            |             |             |             |             |             |             |
|--------------------|------------|-------------|-------------|-------------|-------------|-------------|-------------|
| ENSG00000137965.10 | IFI44      | 2138.318469 | 1.116977022 | 0.165546693 | 6.747202264 | 1.51E-11    | 2.99E-09    |
| ENSG00000092445.11 | TYRO3      | 65.40373641 | 1.115739104 | 0.34570656  | 3.227416638 | 0.001249134 | 0.022759486 |
| ENSG00000224383.7  | PRR29      | 140.9010225 | 1.099473326 | 0.272102828 | 4.040653809 | 5.33E-05    | 0.001947406 |
| ENSG00000115828.15 | QPCT       | 202.2823274 | 1.092917475 | 0.28845134  | 3.788914542 | 0.000151307 | 0.004480597 |
| ENSG00000166963.12 | MAP1A      | 202.9152374 | 1.092793341 | 0.352392549 | 3.101068234 | 0.001928239 | 0.031464737 |
| ENSG00000178860.8  | MSC        | 579.5898228 | 1.09121058  | 0.278468256 | 3.91861749  | 8.91E-05    | 0.002899755 |
| ENSG00000162783.10 | IER5       | 5999.381823 | 1.086731974 | 0.192249467 | 5.652717752 | 1.58E-08    | 1.66E-06    |
| ENSG00000080823.21 | MOK        | 93.09216748 | 1.084427993 | 0.302017235 | 3.59061625  | 0.000329897 | 0.008179968 |
| ENSG00000104856.13 | RELB       | 2239.78101  | 1.083883629 | 0.189206755 | 5.728567302 | 1.01E-08    | 1.15E-06    |
| ENSG00000157077.14 | ZFYVE9     | 261.5064717 | 1.08148924  | 0.227981556 | 4.743757612 | 2.10E-06    | 0.000126107 |
| ENSG00000280649.1  | AC245100.1 | 272.8714576 | 1.078213228 | 0.266694218 | 4.042881899 | 5.28E-05    | 0.001947406 |
| ENSG00000136193.16 | SCRN1      | 716.847532  | 1.077105834 | 0.202508148 | 5.318827154 | 1.04E-07    | 9.12E-06    |
| ENSG00000079819.17 | EPB41L2    | 416.8071596 | 1.076652249 | 0.235452018 | 4.57270343  | 4.81E-06    | 0.000267683 |
| ENSG00000120129.5  | DUSP1      | 10048.01166 | 1.074853487 | 0.299804182 | 3.585185102 | 0.000336839 | 0.008312246 |
| ENSG00000111012.9  | CYP27B1    | 144.1493606 | 1.068011506 | 0.357421897 | 2.98809758  | 0.002807199 | 0.041260254 |
| ENSG00000180530.10 | NRIP1      | 2277.277508 | 1.063802489 | 0.168049078 | 6.330308396 | 2.45E-10    | 3.66E-08    |
| ENSG00000140859.15 | KIFC3      | 392.8760988 | 1.058399063 | 0.355108001 | 2.980499059 | 0.002877791 | 0.041826552 |
| ENSG00000160469.16 | BRSK1      | 124.5371291 | 1.057465982 | 0.2604776   | 4.059719458 | 4.91E-05    | 0.001837996 |
| ENSG00000138670.17 | RASGEF1B   | 1090.09913  | 1.054143716 | 0.339627993 | 3.1038187   | 0.001910404 | 0.031209915 |
| ENSG00000138185.17 | ENTPD1     | 249.8661569 | 1.053571594 | 0.354406789 | 2.972774867 | 0.002951208 | 0.042488942 |
| ENSG00000028277.21 | POU2F2     | 2631.592039 | 1.051892528 | 0.173302366 | 6.069695152 | 1.28E-09    | 1.72E-07    |
| ENSG00000007038.10 | PRSS21     | 81.10051205 | 1.043840584 | 0.338267107 | 3.085847136 | 0.002029731 | 0.032666135 |
| ENSG00000131080.14 | EDA2R      | 69.47381668 | 1.040038601 | 0.273876527 | 3.797472572 | 0.000146179 | 0.004356256 |
| ENSG00000158806.13 | NPM2       | 61.28502265 | 1.039471092 | 0.321217552 | 3.236034535 | 0.001212027 | 0.022461627 |
| ENSG00000182621.17 | PLCB1      | 425.8716652 | 1.036996674 | 0.285612277 | 3.630784659 | 0.000282561 | 0.007292663 |
| ENSG00000120278.15 | PLEKHG1    | 971.3104204 | 1.032690303 | 0.242374043 | 4.260729781 | 2.04E-05    | 0.000901288 |
| ENSG00000175866.15 | BAIAP2     | 299.9268836 | 1.029565369 | 0.22678412  | 4.539847718 | 5.63E-06    | 0.000299941 |
| ENSG00000160183.13 | TMPRSS3    | 404.014634  | 1.028619411 | 0.284051804 | 3.621238785 | 0.000293196 | 0.007509025 |
| ENSG00000122644.12 | ARL4A      | 1377.006956 | 1.024817947 | 0.254946587 | 4.019735895 | 5.83E-05    | 0.002090646 |
| ENSG00000256235.1  | SMIM3      | 918.6427636 | 1.023554189 | 0.170412097 | 6.006347003 | 1.90E-09    | 2.45E-07    |
| ENSG00000233276.3  | GPX1       | 4436.952322 | 1.022534539 | 0.173641364 | 5.88877278  | 3.89E-09    | 4.80E-07    |
| ENSG00000206560.11 | ANKRD28    | 2762.349288 | 1.021768571 | 0.120073191 | 8.509547925 | 1.75E-17    | 8.47E-15    |
| ENSG00000125384.6  | PTGER2     | 686.2512533 | 1.021185445 | 0.233246555 | 4.378137301 | 1.20E-05    | 0.000584608 |
| ENSG00000087074.7  | PPP1R15A   | 39259.60792 | 1.020402754 | 0.328196962 | 3.109117004 | 0.001876474 | 0.030834675 |
| ENSG00000130522.5  | JUND       | 18200.86017 | 1.019601807 | 0.266533758 | 3.825413392 | 0.000130553 | 0.003940678 |
| ENSG00000137269.14 | LRRC1      | 171.3676335 | 1.01917779  | 0.321967766 | 3.165465293 | 0.001548351 | 0.026921026 |
| ENSG00000176834.13 | VSIG10     | 114.6993511 | 1.018001675 | 0.24995354  | 4.072763584 | 4.65E-05    | 0.001752468 |
| ENSG00000231672.6  | DIRC3      | 209.250281  | 1.016053008 | 0.199116768 | 5.102799834 | 3.35E-07    | 2.54E-05    |
| ENSG00000187017.15 | ESPN       | 754.6384761 | 1.007888108 | 0.240494744 | 4.190894538 | 2.78E-05    | 0.00117016  |
| ENSG00000112667.12 | DNPH1      | 1338.357514 | 1.004107591 | 0.144735312 | 6.937543958 | 3.99E-12    | 8.81E-10    |
| ENSG00000137501.17 | SYTL2      | 2512.004337 | 1.00296389  | 0.193620798 | 5.18004212  | 2.22E-07    | 1.78E-05    |
| ENSG00000149573.8  | MPZL2      | 456.076042  | 1.001792522 | 0.226330311 | 4.426241095 | 9.59E-06    | 0.000478291 |
| ENSG00000159335.15 | PTMS       | 742.8548316 | 1.00121279  | 0.293233163 | 3.414391398 | 0.000639247 | 0.013706775 |

**Table S8 B: down-regulated genes in intestinal pTh17-cells as compared to CCR5<sup>+</sup>Th1/17-cells**

| Gene_id            | Gene_name     | baseMean    | log2FoldChange | lfcSE       | stat         | pvalue      | padj        |
|--------------------|---------------|-------------|----------------|-------------|--------------|-------------|-------------|
| ENSG00000186810.7  | CXCR3         | 3506.145553 | -5.016918705   | 0.24545557  | -20.43921314 | 7.49E-93    | 1.05E-88    |
| ENSG00000152969.17 | JAKMIP1       | 274.5123134 | -4.508481848   | 0.375178923 | -12.01688466 | 2.90E-33    | 4.53E-30    |
| ENSG00000137474.19 | MYO7A         | 587.0363055 | -4.450845987   | 1.070161698 | -4.159040633 | 3.20E-05    | 0.001303819 |
| ENSG00000138795.9  | LEF1          | 3288.262823 | -4.155384431   | 0.309740712 | -13.41568698 | 4.89E-41    | 1.15E-37    |
| ENSG00000141753.6  | IGFBP4        | 2116.632654 | -3.859020323   | 0.489362195 | -7.885816194 | 3.12E-15    | 1.16E-12    |
| ENSG00000116574.5  | RHOU          | 388.8021531 | -3.802126941   | 0.215035281 | -17.6814099  | 5.83E-70    | 4.10E-66    |
| ENSG00000196126.10 | HLA-DRB1      | 241.3433864 | -3.583711837   | 0.71828315  | -4.989274543 | 6.06E-07    | 4.28E-05    |
| ENSG00000166105.15 | GLB1L3        | 271.9393087 | -3.475727143   | 0.304929114 | -11.39847585 | 4.26E-30    | 5.99E-27    |
| ENSG00000169413.2  | RNASE6        | 367.1705435 | -3.406598874   | 1.039306316 | -3.277762121 | 0.001046335 | 0.020106219 |
| ENSG00000136250.11 | AOAH          | 446.567238  | -3.35057819    | 0.670391937 | -4.997939273 | 5.79E-07    | 4.14E-05    |
| ENSG00000116106.11 | EPHA4         | 735.8712913 | -3.297736814   | 0.408863925 | -8.065609634 | 7.29E-16    | 3.01E-13    |
| ENSG00000109956.12 | B3GAT1        | 137.9765636 | -3.173512282   | 0.407175758 | -7.793961739 | 6.49E-15    | 2.17E-12    |
| ENSG00000205336.11 | ADGRG1        | 210.4771515 | -3.152702352   | 0.754698335 | -4.177433824 | 2.95E-05    | 0.00122689  |
| ENSG00000156299.13 | TIAM1         | 651.0678922 | -3.133925446   | 0.317893905 | -9.858400549 | 6.30E-23    | 4.93E-20    |
| ENSG00000158714.10 | SLAMF8        | 244.7066899 | -3.116383259   | 0.850757774 | -3.663067627 | 0.000249213 | 0.006539974 |
| ENSG00000131398.13 | KCNC3         | 263.9191631 | -3.082461637   | 0.423197765 | -7.283737978 | 3.25E-13    | 8.62E-11    |
| ENSG00000261371.5  | PECAM1        | 183.8964229 | -3.051276649   | 0.479210214 | -6.367303027 | 1.92E-10    | 3.04E-08    |
| ENSG00000135821.17 | GLUL          | 2763.941929 | -3.046510874   | 0.301821953 | -10.09373519 | 5.89E-24    | 5.92E-21    |
| ENSG00000149328.14 | GLB1L2        | 823.2495193 | -2.984487486   | 0.327704903 | -9.10724087  | 8.45E-20    | 5.17E-17    |
| ENSG00000166833.19 | NAV2          | 96.4929618  | -2.983146121   | 0.423563223 | -7.042977198 | 1.88E-12    | 4.41E-10    |
| ENSG00000204287.13 | HLA-DRA       | 383.494382  | -2.964503474   | 0.974890096 | -3.040859155 | 0.002359042 | 0.036139901 |
| ENSG00000137936.16 | BCAR3         | 115.1486374 | -2.947188633   | 0.898274686 | -3.280943655 | 0.001034604 | 0.019935262 |
| ENSG00000179583.18 | CIITA         | 401.2020559 | -2.888595937   | 0.658728055 | -4.385111452 | 1.16E-05    | 0.000568161 |
| ENSG00000134198.9  | TSPAN2        | 130.1179239 | -2.848120844   | 0.450873887 | -6.316890209 | 2.67E-10    | 3.91E-08    |
| ENSG00000124191.17 | TOX2          | 464.7711582 | -2.800585403   | 0.768230674 | -3.645500628 | 0.000266872 | 0.006964412 |
| ENSG00000173905.8  | GOLIM4        | 247.3231924 | -2.800157572   | 0.377701625 | -7.413676254 | 1.23E-13    | 3.60E-11    |
| ENSG00000135114.12 | OASL          | 953.7065508 | -2.799723216   | 0.586595188 | -4.772836999 | 1.82E-06    | 0.00011109  |
| ENSG00000103522.15 | IL21R         | 728.9844763 | -2.765652079   | 0.22521958  | -12.27980304 | 1.16E-34    | 2.04E-31    |
| ENSG00000172236.16 | TPSAB1        | 514.6752259 | -2.748354547   | 0.903657453 | -3.041367652 | 0.002355061 | 0.036136634 |
| ENSG00000120885.20 | CLU           | 1543.245803 | -2.727955467   | 0.278274436 | -9.803112006 | 1.09E-22    | 8.08E-20    |
| ENSG00000148053.15 | NTRK2         | 276.1923049 | -2.722437409   | 0.445047331 | -6.117186236 | 9.52E-10    | 1.31E-07    |
| ENSG00000172292.14 | CERS6         | 178.5896585 | -2.717651953   | 0.392928373 | -6.916405475 | 4.63E-12    | 1.00E-09    |
| ENSG00000223865.10 | HLA-DPB1      | 461.6839124 | -2.681578961   | 0.412031828 | -6.508184021 | 7.61E-11    | 1.32E-08    |
| ENSG00000196218.12 | RYR1          | 1591.154078 | -2.630572226   | 0.290744347 | -9.047715823 | 1.46E-19    | 7.90E-17    |
| ENSG00000118263.14 | KLF7          | 279.9951417 | -2.595324516   | 0.459631301 | -5.646535623 | 1.64E-08    | 1.69E-06    |
| ENSG00000144354.13 | CDCA7         | 1083.082527 | -2.559776941   | 0.328286608 | -7.797384606 | 6.32E-15    | 2.17E-12    |
| ENSG00000107281.9  | NPDC1         | 388.1337076 | -2.546572864   | 0.760754316 | -3.347431371 | 0.000815642 | 0.016651404 |
| ENSG00000166503.8  | RP11-382A20.3 | 363.8139886 | -2.492150852   | 0.382305438 | -6.518742879 | 7.09E-11    | 1.26E-08    |
| ENSG00000146216.11 | TTBK1         | 104.8958679 | -2.466818531   | 0.61043658  | -4.04107259  | 5.32E-05    | 0.001947406 |
| ENSG00000128656.13 | CHN1          | 969.5033405 | -2.418306647   | 0.266758912 | -9.065513995 | 1.24E-19    | 6.98E-17    |
| ENSG00000160255.17 | ITGB2         | 7547.878738 | -2.387118458   | 0.213651459 | -11.17295652 | 5.53E-29    | 6.48E-26    |
| ENSG00000173482.16 | PTPRM         | 2122.60124  | -2.376196951   | 0.210688308 | -11.27825733 | 1.68E-29    | 2.15E-26    |
| ENSG00000100292.16 | HMOX1         | 336.0806204 | -2.33528172    | 0.763813862 | -3.05739636  | 0.002232688 | 0.034894438 |
| ENSG00000088992.17 | TESC          | 204.5903518 | -2.268270574   | 0.359815989 | -6.303973818 | 2.90E-10    | 4.21E-08    |
| ENSG00000173218.14 | VANGL1        | 108.2349708 | -2.2638974     | 0.435728939 | -5.195655367 | 2.04E-07    | 1.65E-05    |

|                    |          |             |              |             |              |             |             |
|--------------------|----------|-------------|--------------|-------------|--------------|-------------|-------------|
| ENSG00000100311.16 | PDGFB    | 105.6093737 | -2.233695782 | 0.404916934 | -5.516429648 | 3.46E-08    | 3.36E-06    |
| ENSG00000119408.16 | NEK6     | 134.1551548 | -2.224047958 | 0.345420279 | -6.438672225 | 1.21E-10    | 1.95E-08    |
| ENSG00000067840.12 | PDZD4    | 109.1711369 | -2.192460082 | 0.493942339 | -4.438696402 | 9.05E-06    | 0.000453042 |
| ENSG00000003096.13 | KLHL13   | 39.30566191 | -2.176481272 | 0.488962543 | -4.451222907 | 8.54E-06    | 0.000433571 |
| ENSG00000184613.10 | NELL2    | 3117.827838 | -2.155645462 | 0.344875227 | -6.250508284 | 4.09E-10    | 5.81E-08    |
| ENSG00000079308.16 | TNS1     | 108.783084  | -2.155054838 | 0.537070617 | -4.012609832 | 6.01E-05    | 0.002143856 |
| ENSG00000050327.14 | ARHGEF5  | 84.1394807  | -2.143155029 | 0.320259909 | -6.691924189 | 2.20E-11    | 4.24E-09    |
| ENSG00000186854.10 | TRABD2A  | 599.6395865 | -2.138468051 | 0.290871705 | -7.351928754 | 1.95E-13    | 5.50E-11    |
| ENSG00000197943.9  | PLCG2    | 375.5659257 | -2.114479825 | 0.304509716 | -6.943882948 | 3.81E-12    | 8.65E-10    |
| ENSG00000178773.14 | CPNE7    | 2766.038802 | -2.073402952 | 0.20585602  | -10.0721026  | 7.34E-24    | 6.45E-21    |
| ENSG00000160856.20 | FCRL3    | 83.05903278 | -2.058712952 | 0.55750838  | -3.692703153 | 0.000221883 | 0.005967506 |
| ENSG00000159307.18 | SCUBE1   | 181.525952  | -2.046757618 | 0.444550591 | -4.604105045 | 4.14E-06    | 0.00023122  |
| ENSG00000102349.16 | KLF8     | 107.8081117 | -2.01992773  | 0.471892154 | -4.280485942 | 1.86E-05    | 0.000843443 |
| ENSG00000110777.11 | POU2AF1  | 180.8358715 | -1.992797273 | 0.493730686 | -4.036202996 | 5.43E-05    | 0.001979561 |
| ENSG00000013619.13 | MAMLD1   | 215.4930986 | -1.980771587 | 0.421551934 | -4.698760525 | 2.62E-06    | 0.000153404 |
| ENSG00000135925.8  | WNT10A   | 109.0591507 | -1.946515992 | 0.603786039 | -3.223850614 | 0.001264794 | 0.022955596 |
| ENSG00000198915.11 | RASGEF1A | 175.4470248 | -1.934009785 | 0.269670732 | -7.17174523  | 7.40E-13    | 1.83E-10    |
| ENSG00000168994.13 | PXDC1    | 93.91150066 | -1.924367591 | 0.426889243 | -4.507884946 | 6.55E-06    | 0.000342379 |
| ENSG00000118402.5  | ELOVL4   | 199.2896925 | -1.921178607 | 0.383273551 | -5.012552009 | 5.37E-07    | 3.87E-05    |
| ENSG00000131746.12 | TNS4     | 72.08035919 | -1.905507395 | 0.484288165 | -3.934656126 | 8.33E-05    | 0.002777065 |
| ENSG00000187808.4  | SOWAHD   | 104.834542  | -1.898930548 | 0.574251317 | -3.306793546 | 0.000943704 | 0.018801902 |
| ENSG00000164687.10 | FABP5    | 162.6796161 | -1.887369955 | 0.340155843 | -5.548544866 | 2.88E-08    | 2.85E-06    |
| ENSG00000159640.15 | ACE      | 769.2800904 | -1.882441295 | 0.127383634 | -14.77773276 | 2.04E-49    | 9.56E-46    |
| ENSG00000115956.9  | PLEK     | 519.6499175 | -1.869089491 | 0.386604335 | -4.834631488 | 1.33E-06    | 8.49E-05    |
| ENSG00000186265.9  | BTLA     | 285.3439909 | -1.86082337  | 0.390696135 | -4.762840491 | 1.91E-06    | 0.000116234 |
| ENSG00000184524.5  | CEND1    | 100.9928291 | -1.842308286 | 0.512460467 | -3.59502519  | 0.00032436  | 0.008089451 |
| ENSG00000198794.11 | SCAMP5   | 52.36204821 | -1.84124327  | 0.434878266 | -4.23392801  | 2.30E-05    | 0.001003161 |
| ENSG00000087589.16 | CASS4    | 433.5445652 | -1.836138391 | 0.276688047 | -6.636131955 | 3.22E-11    | 6.11E-09    |
| ENSG00000172794.19 | RAB37    | 2650.108297 | -1.818544005 | 0.226357155 | -8.033958566 | 9.44E-16    | 3.79E-13    |
| ENSG00000177301.13 | KCNA2    | 212.1829439 | -1.811997032 | 0.345880591 | -5.238793609 | 1.62E-07    | 1.35E-05    |
| ENSG00000185989.10 | RASA3    | 2434.460044 | -1.794234691 | 0.237590056 | -7.551808864 | 4.29E-14    | 1.34E-11    |
| ENSG00000182230.11 | FAM153B  | 142.0926762 | -1.776324329 | 0.357763227 | -4.965083601 | 6.87E-07    | 4.71E-05    |
| ENSG00000128578.9  | STRIP2   | 81.73256111 | -1.76883365  | 0.493536726 | -3.583995994 | 0.000338377 | 0.008321005 |
| ENSG00000231389.7  | HLA-DPA1 | 1415.130707 | -1.756878202 | 0.350438028 | -5.013377721 | 5.35E-07    | 3.87E-05    |
| ENSG00000189233.11 | NUGGC    | 410.5858975 | -1.750570651 | 0.313597359 | -5.582223828 | 2.37E-08    | 2.40E-06    |
| ENSG00000124496.12 | TRERF1   | 5279.964623 | -1.743607534 | 0.175148226 | -9.955039637 | 2.40E-23    | 1.98E-20    |
| ENSG00000169715.14 | MT1E     | 151.4242208 | -1.732834712 | 0.482645362 | -3.590285637 | 0.000330316 | 0.008179968 |
| ENSG00000168734.13 | PKIG     | 288.0858068 | -1.714649209 | 0.442706621 | -3.873104959 | 0.000107458 | 0.003373878 |
| ENSG00000184916.8  | JAG2     | 234.6186293 | -1.70805441  | 0.321838108 | -5.307185092 | 1.11E-07    | 9.67E-06    |
| ENSG00000181804.14 | SLC9A9   | 575.2592584 | -1.702955123 | 0.319198584 | -5.335096116 | 9.55E-08    | 8.50E-06    |
| ENSG00000125430.8  | HS3ST3B1 | 308.1363347 | -1.673009013 | 0.406662328 | -4.114000482 | 3.89E-05    | 0.001527853 |
| ENSG00000018408.14 | WWTR1    | 170.6909749 | -1.662592467 | 0.37288365  | -4.458743272 | 8.24E-06    | 0.000420153 |
| ENSG00000105707.13 | HPN      | 63.32121681 | -1.656231479 | 0.395459417 | -4.188119959 | 2.81E-05    | 0.001181018 |
| ENSG00000180543.4  | TSPYL5   | 63.37923821 | -1.645517895 | 0.481108283 | -3.420265151 | 0.000625601 | 0.013517216 |
| ENSG00000170989.8  | S1PR1    | 2606.256623 | -1.63371688  | 0.310190969 | -5.266809942 | 1.39E-07    | 1.18E-05    |
| ENSG00000105369.9  | CD79A    | 136.8942599 | -1.607617233 | 0.497503444 | -3.231369051 | 0.001231988 | 0.022652467 |
| ENSG00000163545.8  | NUAK2    | 488.2553937 | -1.59215504  | 0.279227322 | -5.702003046 | 1.18E-08    | 1.30E-06    |
| ENSG00000188322.4  | SBK1     | 419.9796616 | -1.589177484 | 0.271573539 | -5.851739056 | 4.86E-09    | 5.90E-07    |



|                    |             |             |              |             |              |             |             |
|--------------------|-------------|-------------|--------------|-------------|--------------|-------------|-------------|
| ENSG00000128268.11 | MGAT3       | 149.5431002 | -1.574498257 | 0.497203214 | -3.166709731 | 0.001541741 | 0.026839273 |
| ENSG00000165959.11 | CLMN        | 63.1609524  | -1.571186436 | 0.42149555  | -3.727646562 | 0.000193276 | 0.005412039 |
| ENSG00000101004.14 | NINL        | 243.1685648 | -1.564706809 | 0.229401363 | -6.820826116 | 9.05E-12    | 1.87E-09    |
| ENSG00000131370.15 | SH3BP5      | 288.5203935 | -1.561029212 | 0.274545373 | -5.68586967  | 1.30E-08    | 1.40E-06    |
| ENSG00000188404.8  | SELL        | 1880.019099 | -1.541249272 | 0.519059792 | -2.969309691 | 0.002984696 | 0.042927135 |
| ENSG00000204257.14 | HLA-DMA     | 139.1572244 | -1.537771126 | 0.384415949 | -4.000279208 | 6.33E-05    | 0.002219264 |
| ENSG00000126353.3  | CCR7        | 3444.087397 | -1.529230475 | 0.278792891 | -5.485184609 | 4.13E-08    | 3.98E-06    |
| ENSG00000179388.8  | EGR3        | 39.17160089 | -1.525980701 | 0.498911571 | -3.058619583 | 0.002223593 | 0.034790947 |
| ENSG00000133069.15 | TMCC2       | 111.486512  | -1.513629476 | 0.362905274 | -4.170866574 | 3.03E-05    | 0.001251682 |
| ENSG00000080854.14 | IGSF9B      | 378.4804582 | -1.513607671 | 0.375432778 | -4.031634316 | 5.54E-05    | 0.002013231 |
| ENSG00000204475.9  | NCR3        | 157.3098228 | -1.511015621 | 0.420392087 | -3.594300815 | 0.000325264 | 0.008097631 |
| ENSG00000188886.3  | ASTL        | 92.22831065 | -1.510670329 | 0.361052765 | -4.184070792 | 2.86E-05    | 0.001198686 |
| ENSG00000081985.10 | IL12RB2     | 1298.149315 | -1.497941183 | 0.234052604 | -6.400019308 | 1.55E-10    | 2.48E-08    |
| ENSG00000127124.14 | HIVEP3      | 756.8238305 | -1.485186525 | 0.199000764 | -7.463220234 | 8.44E-14    | 2.58E-11    |
| ENSG00000186310.9  | NAP1L3      | 111.2207774 | -1.470645746 | 0.31357552  | -4.689925244 | 2.73E-06    | 0.000159515 |
| ENSG00000176438.12 | SYNE3       | 2013.110323 | -1.469814654 | 0.103709762 | -14.17238481 | 1.36E-45    | 4.78E-42    |
| ENSG00000212916.4  | MAP10       | 94.7686769  | -1.461359419 | 0.353562177 | -4.133245903 | 3.58E-05    | 0.001436194 |
| ENSG00000064666.14 | CNN2        | 7672.338531 | -1.457949959 | 0.17784823  | -8.197719808 | 2.45E-16    | 1.04E-13    |
| ENSG00000100027.14 | YPEL1       | 228.5210828 | -1.448721225 | 0.241273622 | -6.004474147 | 1.92E-09    | 2.45E-07    |
| ENSG00000142512.14 | SIGLEC10    | 26.45546591 | -1.443429006 | 0.46375855  | -3.112457996 | 0.001855364 | 0.030611812 |
| ENSG00000020129.15 | NCDN        | 6240.305513 | -1.44175013  | 0.23954946  | -6.018590614 | 1.76E-09    | 2.29E-07    |
| ENSG00000152782.16 | PANK1       | 149.4054625 | -1.431769996 | 0.282560167 | -5.067133184 | 4.04E-07    | 2.99E-05    |
| ENSG00000104689.9  | TNFRSF10A   | 593.5665061 | -1.387741542 | 0.164030049 | -8.460288528 | 2.67E-17    | 1.25E-14    |
| ENSG00000184792.15 | OSBP2       | 137.0952099 | -1.347245206 | 0.310869294 | -4.33379955  | 1.47E-05    | 0.000698627 |
| ENSG00000197077.13 | KIAA1671    | 2062.305551 | -1.343875039 | 0.21191424  | -6.341598544 | 2.27E-10    | 3.48E-08    |
| ENSG00000141161.11 | UNC45B      | 30.77584911 | -1.34128397  | 0.410381009 | -3.268387035 | 0.001081623 | 0.020509565 |
| ENSG00000143153.12 | ATP1B1      | 66.33906783 | -1.337393775 | 0.443644721 | -3.014560329 | 0.00257352  | 0.03867429  |
| ENSG00000175471.19 | MCTP1       | 120.1444568 | -1.334463814 | 0.302077074 | -4.417626914 | 9.98E-06    | 0.00049599  |
| ENSG00000149212.11 | SESN3       | 2247.121847 | -1.33306805  | 0.341741116 | -3.900812601 | 9.59E-05    | 0.003074716 |
| ENSG00000263264.1  | CTB-133G6.1 | 417.8211195 | -1.319106435 | 0.275757164 | -4.783579931 | 1.72E-06    | 0.000106236 |
| ENSG00000034053.14 | APBA2       | 1300.977216 | -1.315517095 | 0.221376902 | -5.942431591 | 2.81E-09    | 3.53E-07    |
| ENSG00000178075.19 | GRAMD1C     | 532.9610523 | -1.315280993 | 0.328683457 | -4.001664712 | 6.29E-05    | 0.002211822 |
| ENSG00000158050.4  | DUSP2       | 1094.539162 | -1.311764645 | 0.290310628 | -4.518486469 | 6.23E-06    | 0.000330595 |
| ENSG00000139193.3  | CD27        | 610.3281062 | -1.298394911 | 0.27326233  | -4.75145957  | 2.02E-06    | 0.000121918 |
| ENSG00000122547.10 | EEPD1       | 318.4625072 | -1.295319423 | 0.377584018 | -3.430546216 | 0.000602367 | 0.013095671 |
| ENSG00000035664.11 | DAPK2       | 2867.684206 | -1.291985793 | 0.283532208 | -4.556751418 | 5.20E-06    | 0.000283183 |
| ENSG00000073849.14 | ST6GAL1     | 4344.255685 | -1.281621587 | 0.094796036 | -13.51978039 | 1.20E-41    | 3.36E-38    |
| ENSG00000204396.10 | VWA7        | 46.2672434  | -1.281410532 | 0.379236469 | -3.37892222  | 0.000727706 | 0.015186813 |
| ENSG00000229474.6  | PATL2       | 1210.382454 | -1.275352442 | 0.192720784 | -6.617617543 | 3.65E-11    | 6.76E-09    |
| ENSG00000132718.8  | SYT11       | 2840.871743 | -1.272844057 | 0.278495458 | -4.570430216 | 4.87E-06    | 0.000268481 |
| ENSG00000180644.6  | PRF1        | 1193.808003 | -1.264542415 | 0.357479947 | -3.537379999 | 0.000404118 | 0.009537451 |
| ENSG00000104447.11 | TRPS1       | 1143.233701 | -1.261044727 | 0.371687363 | -3.392756531 | 0.000691931 | 0.014657685 |
| ENSG00000126822.16 | PLEKHG3     | 974.1328732 | -1.260663971 | 0.234009451 | -5.387235294 | 7.15E-08    | 6.41E-06    |
| ENSG00000105963.13 | ADAP1       | 273.0736729 | -1.260547079 | 0.217018574 | -5.808475546 | 6.30E-09    | 7.33E-07    |
| ENSG00000129116.17 | PALLD       | 117.5409399 | -1.258626331 | 0.428566867 | -2.936826034 | 0.003315901 | 0.046363278 |
| ENSG00000078900.14 | TP73        | 76.31631325 | -1.254184292 | 0.397180765 | -3.15771659  | 0.001590101 | 0.027443381 |
| ENSG00000173208.3  | ABCD2       | 923.4670176 | -1.25100413  | 0.239563972 | -5.222004459 | 1.77E-07    | 1.46E-05    |
| ENSG00000083290.19 | ULK2        | 355.4047356 | -1.243456872 | 0.301008653 | -4.130967196 | 3.61E-05    | 0.001443524 |

|                    |           |             |              |             |              |             |             |
|--------------------|-----------|-------------|--------------|-------------|--------------|-------------|-------------|
| ENSG00000100298.15 | APOBEC3H  | 323.3438752 | -1.241533067 | 0.289751067 | -4.284826553 | 1.83E-05    | 0.000832497 |
| ENSG00000112303.13 | VNN2      | 178.7672811 | -1.227047669 | 0.284125682 | -4.318679189 | 1.57E-05    | 0.000738421 |
| ENSG00000186350.9  | RXRA      | 487.6140809 | -1.221028773 | 0.262370683 | -4.653830838 | 3.26E-06    | 0.000185548 |
| ENSG00000168824.14 | NSG1      | 934.3937716 | -1.220636715 | 0.248893436 | -4.904254352 | 9.38E-07    | 6.25E-05    |
| ENSG00000120738.7  | EGR1      | 211.0466596 | -1.220423489 | 0.373071164 | -3.271288713 | 0.001070586 | 0.020377342 |
| ENSG00000127311.9  | HELB      | 1941.066956 | -1.213781564 | 0.301328905 | -4.028095362 | 5.62E-05    | 0.002038502 |
| ENSG00000136379.11 | ABHD17C   | 72.3516146  | -1.20765018  | 0.366279323 | -3.297074404 | 0.000976976 | 0.019241358 |
| ENSG00000116133.11 | DHCR24    | 1341.550541 | -1.206735713 | 0.32811283  | -3.677807156 | 0.000235248 | 0.006272578 |
| ENSG00000066294.14 | CD84      | 2662.886891 | -1.199149561 | 0.22132791  | -5.417977156 | 6.03E-08    | 5.53E-06    |
| ENSG00000140939.14 | NOL3      | 126.4690277 | -1.182283463 | 0.285606399 | -4.139555228 | 3.48E-05    | 0.001406518 |
| ENSG00000069702.10 | TGFBR3    | 1066.622625 | -1.173527676 | 0.157573118 | -7.447511951 | 9.51E-14    | 2.85E-11    |
| ENSG00000140545.14 | MFGE8     | 364.8779521 | -1.171917417 | 0.298252014 | -3.929285844 | 8.52E-05    | 0.00281977  |
| ENSG00000187231.13 | SESTD1    | 212.8931636 | -1.161435774 | 0.313630651 | -3.703196001 | 0.0002129   | 0.00579237  |
| ENSG00000127824.13 | TUBA4A    | 8158.383115 | -1.151056807 | 0.221140267 | -5.205098198 | 1.94E-07    | 1.58E-05    |
| ENSG00000139679.15 | LPAR6     | 960.5100264 | -1.148466657 | 0.302739607 | -3.793579135 | 0.000148491 | 0.00441581  |
| ENSG00000122188.12 | LAX1      | 1257.471509 | -1.120644789 | 0.276961196 | -4.046215879 | 5.21E-05    | 0.001926755 |
| ENSG00000116991.10 | SIPA1L2   | 316.5242009 | -1.116322091 | 0.361940361 | -3.084270811 | 0.002040518 | 0.032679443 |
| ENSG00000198743.6  | SLC5A3    | 2551.916505 | -1.113174294 | 0.227737866 | -4.887963139 | 1.02E-06    | 6.63E-05    |
| ENSG00000091831.21 | ESR1      | 193.4932578 | -1.102028031 | 0.235398847 | -4.681535388 | 2.85E-06    | 0.000164818 |
| ENSG00000172716.16 | SLFN11    | 1334.854795 | -1.091667383 | 0.273531196 | -3.991016013 | 6.58E-05    | 0.002273526 |
| ENSG00000105409.16 | ATP1A3    | 653.2979906 | -1.089162189 | 0.212943603 | -5.11479177  | 3.14E-07    | 2.41E-05    |
| ENSG00000146904.8  | EPHA1     | 792.9075898 | -1.079517153 | 0.281413242 | -3.836056707 | 0.000125026 | 0.003814771 |
| ENSG00000006756.15 | ARSD      | 131.2600096 | -1.079360777 | 0.275862834 | -3.912671966 | 9.13E-05    | 0.002958413 |
| ENSG00000142687.17 | KIAA0319L | 8287.960973 | -1.06649822  | 0.271859862 | -3.922970499 | 8.75E-05    | 0.002855103 |
| ENSG00000266338.6  | NBPF15    | 1690.45372  | -1.063700398 | 0.167607753 | -6.34636752  | 2.20E-10    | 3.41E-08    |
| ENSG00000153094.21 | BCL2L11   | 2611.840785 | -1.061997567 | 0.184408304 | -5.758946563 | 8.46E-09    | 9.76E-07    |
| ENSG00000114948.12 | ADAM23    | 1107.027954 | -1.057289567 | 0.339898762 | -3.110601403 | 0.001867068 | 0.030715995 |
| ENSG00000239713.7  | APOBEC3G  | 1819.766815 | -1.047874778 | 0.135836898 | -7.714213105 | 1.22E-14    | 3.98E-12    |
| ENSG00000092964.17 | DPYSL2    | 360.7518462 | -1.044109735 | 0.278540941 | -3.748496472 | 0.000177898 | 0.005075682 |
| ENSG00000159216.18 | RUNX1     | 5640.64563  | -1.043394098 | 0.112316223 | -9.28978978  | 1.55E-20    | 1.04E-17    |
| ENSG00000243811.7  | APOBEC3D  | 711.3594969 | -1.025286722 | 0.224275386 | -4.571552596 | 4.84E-06    | 0.000268098 |
| ENSG00000271503.5  | CCL5      | 11501.23145 | -1.01612484  | 0.297279876 | -3.418074752 | 0.000630658 | 0.013584737 |
| ENSG00000146776.14 | ATXN7L1   | 880.8261701 | -1.015935897 | 0.190973279 | -5.319780354 | 1.04E-07    | 9.12E-06    |
| ENSG00000204219.9  | TCEA3     | 113.1281689 | -1.013888528 | 0.347189185 | -2.920276816 | 0.003497206 | 0.048164365 |
| ENSG00000099219.13 | ERMP1     | 929.3988984 | -1.002129005 | 0.276838471 | -3.619905145 | 0.000294711 | 0.007523422 |

**Table S9 A: up-regulated genes in intestinal pTh17-cells as compared to all other CCR6<sup>+</sup>Th subsets**

| Gene_id            | Gene_name | baseMean    | log2FoldChange | lfcSE       | stat        | pvalue      | padj        |
|--------------------|-----------|-------------|----------------|-------------|-------------|-------------|-------------|
| ENSG00000062524.15 | LTK       | 2387.549681 | 2.855007227    | 0.763174711 | 3.740961521 | 0.000183318 | 0.004780923 |
| ENSG00000155629.14 | PIK3AP1   | 473.2938346 | 2.779360279    | 0.688519658 | 4.036718846 | 5.42E-05    | 0.001907593 |
| ENSG00000157404.15 | KIT       | 2195.429181 | 2.596393133    | 0.630425009 | 4.118480544 | 3.81E-05    | 0.00148195  |
| ENSG00000181264.8  | TMEM136   | 92.81799674 | 2.53048514     | 0.314282463 | 8.051626929 | 8.17E-16    | 8.85E-13    |
| ENSG00000134256.12 | CD101     | 723.351847  | 2.477524006    | 0.666869704 | 3.715154534 | 0.00020308  | 0.005192465 |
| ENSG00000187479.5  | C11orf96  | 108.402774  | 2.445649363    | 0.530450838 | 4.610510885 | 4.02E-06    | 0.000260711 |
| ENSG00000109906.13 | ZBTB16    | 110.4745926 | 2.364988263    | 0.494064172 | 4.786803811 | 1.69E-06    | 0.00013468  |
| ENSG00000196914.8  | ARHGEF12  | 2527.702269 | 2.355657297    | 0.35889694  | 6.563603731 | 5.25E-11    | 2.28E-08    |
| ENSG00000154917.10 | RAB6B     | 408.956532  | 2.301526036    | 0.379564579 | 6.063595409 | 1.33E-09    | 3.47E-07    |
| ENSG00000129521.13 | EGLN3     | 470.0464236 | 2.297259742    | 0.467449388 | 4.914456625 | 8.90E-07    | 8.24E-05    |
| ENSG00000157985.18 | AGAP1     | 111.1083272 | 2.266898659    | 0.519592309 | 4.362841061 | 1.28E-05    | 0.000648431 |
| ENSG00000140470.13 | ADAMTS17  | 118.2575966 | 2.230566607    | 0.410765341 | 5.430269747 | 5.63E-08    | 8.07E-06    |
| ENSG00000130635.15 | COL5A1    | 2128.890246 | 2.210127276    | 0.372053698 | 5.94034487  | 2.84E-09    | 6.69E-07    |
| ENSG00000120549.17 | KIAA1217  | 283.8505954 | 2.196767305    | 0.365808405 | 6.005240102 | 1.91E-09    | 4.64E-07    |
| ENSG00000050165.17 | DKK3      | 352.1518506 | 2.170552553    | 0.631743149 | 3.435814945 | 0.000590774 | 0.011789337 |
| ENSG00000134253.9  | TRIM45    | 139.5286997 | 2.16577432     | 0.354524245 | 6.10895968  | 1.00E-09    | 2.77E-07    |
| ENSG00000115594.11 | IL1R1     | 941.8105023 | 2.148925145    | 0.565296683 | 3.801411207 | 0.000143874 | 0.004007248 |
| ENSG00000137825.10 | ITPKA     | 32.7003107  | 2.126268736    | 0.618936308 | 3.435359515 | 0.000591768 | 0.011789337 |
| ENSG00000104951.15 | IL4I1     | 1656.752857 | 2.118571073    | 0.328659968 | 6.446087987 | 1.15E-10    | 4.33E-08    |
| ENSG00000162772.16 | ATF3      | 2146.841961 | 2.115274458    | 0.425167273 | 4.975158227 | 6.52E-07    | 6.49E-05    |
| ENSG00000164056.10 | SPRY1     | 910.7642979 | 2.013605967    | 0.318562697 | 6.320909462 | 2.60E-10    | 9.10E-08    |
| ENSG00000187796.13 | CARD9     | 127.2857791 | 1.991374028    | 0.332095724 | 5.996385635 | 2.02E-09    | 4.82E-07    |
| ENSG00000134317.17 | GRHL1     | 34.8634498  | 1.981022805    | 0.442789504 | 4.473960623 | 7.68E-06    | 0.000435331 |
| ENSG00000149573.8  | MPZL2     | 456.076042  | 1.980203676    | 0.689178066 | 2.873283079 | 0.004062299 | 0.043517269 |
| ENSG00000121297.6  | TSHZ3     | 43.39832752 | 1.97961083     | 0.354464633 | 5.584790827 | 2.34E-08    | 3.90E-06    |
| ENSG00000135898.9  | GPR55     | 730.9814874 | 1.930068859    | 0.569576733 | 3.388602003 | 0.000702499 | 0.013311288 |
| ENSG00000130202.9  | NECTIN2   | 128.8341785 | 1.927313095    | 0.508028404 | 3.793711299 | 0.000148412 | 0.004068179 |
| ENSG00000117399.13 | CDC20     | 41.47237108 | 1.911462136    | 0.630137452 | 3.033405059 | 0.002418108 | 0.030886322 |
| ENSG00000204161.13 | C10orf128 | 818.7964231 | 1.891276112    | 0.642643965 | 2.942960979 | 0.003250894 | 0.037788349 |
| ENSG00000173114.12 | LRRN3     | 1483.275348 | 1.871316518    | 0.417155391 | 4.485897962 | 7.26E-06    | 0.000414933 |
| ENSG00000125726.10 | CD70      | 216.937412  | 1.857881801    | 0.336602169 | 5.519518206 | 3.40E-08    | 5.24E-06    |
| ENSG00000177191.2  | B3GNT8    | 80.18055274 | 1.852260324    | 0.392103786 | 4.723903186 | 2.31E-06    | 0.000171198 |
| ENSG00000141756.18 | FKBP10    | 42.47909145 | 1.843938416    | 0.620244436 | 2.972922139 | 0.002949793 | 0.03525622  |
| ENSG00000092445.11 | TYRO3     | 65.40373641 | 1.824769217    | 0.42280554  | 4.315859288 | 1.59E-05    | 0.000752626 |
| ENSG00000162594.15 | IL23R     | 114.7690542 | 1.803483903    | 0.472512766 | 3.816794026 | 0.000135197 | 0.003840129 |
| ENSG00000005020.12 | SKAP2     | 1186.518067 | 1.777384119    | 0.320356117 | 5.548151017 | 2.89E-08    | 4.60E-06    |
| ENSG00000159335.15 | PTMS      | 742.8548316 | 1.776260676    | 0.44712348  | 3.972640121 | 7.11E-05    | 0.002343856 |
| ENSG00000063438.16 | AHRR      | 1698.216035 | 1.766642276    | 0.300625988 | 5.876545431 | 4.19E-09    | 9.39E-07    |
| ENSG00000137501.17 | SYTL2     | 2512.004337 | 1.748044206    | 0.545544765 | 3.204217727 | 0.0013543   | 0.021046676 |
| ENSG00000175048.16 | ZDHHC14   | 607.214429  | 1.739003713    | 0.426330436 | 4.079004374 | 4.52E-05    | 0.001682828 |
| ENSG00000165030.3  | NFIL3     | 424.442677  | 1.736762393    | 0.36295062  | 4.785120338 | 1.71E-06    | 0.00013468  |
| ENSG00000089692.8  | LAG3      | 659.8636874 | 1.720514147    | 0.598874037 | 2.872914903 | 0.004067036 | 0.043535501 |
| ENSG00000129654.7  | FOXJ1     | 110.5753211 | 1.709234082    | 0.348367496 | 4.906410899 | 9.28E-07    | 8.42E-05    |
| ENSG00000177602.5  | GSG2      | 538.087807  | 1.687230954    | 0.387785833 | 4.350935002 | 1.36E-05    | 0.000677508 |
| ENSG00000095397.13 | WHRN      | 1065.724677 | 1.677990241    | 0.355699418 | 4.717438817 | 2.39E-06    | 0.000175259 |

|                    |           |             |             |             |             |             |             |
|--------------------|-----------|-------------|-------------|-------------|-------------|-------------|-------------|
| ENSG00000158806.13 | NPM2      | 61.28502265 | 1.657425341 | 0.372099938 | 4.454247831 | 8.42E-06    | 0.000471715 |
| ENSG00000112290.12 | WASF1     | 93.83298764 | 1.640443596 | 0.430399153 | 3.811447085 | 0.000138156 | 0.003900993 |
| ENSG00000142949.16 | PTPRF     | 128.907957  | 1.635838802 | 0.320339236 | 5.106582702 | 3.28E-07    | 3.71E-05    |
| ENSG00000094804.9  | CDC6      | 88.92393706 | 1.635528866 | 0.512116096 | 3.193668151 | 0.001404775 | 0.021620271 |
| ENSG00000083457.11 | ITGAE     | 4213.774947 | 1.628897959 | 0.309697921 | 5.259634791 | 1.44E-07    | 1.83E-05    |
| ENSG00000125384.6  | PTGER2    | 686.2512533 | 1.619110253 | 0.390612769 | 4.145052035 | 3.40E-05    | 0.001346183 |
| ENSG00000189420.8  | ZFP92     | 450.1593034 | 1.618408454 | 0.28685161  | 5.641970958 | 1.68E-08    | 2.98E-06    |
| ENSG00000143036.16 | SLC44A3   | 133.3318833 | 1.612307657 | 0.429810088 | 3.751209431 | 0.000175984 | 0.004623277 |
| ENSG00000143434.15 | SEMA6C    | 701.3887952 | 1.595691607 | 0.234144581 | 6.814984156 | 9.43E-12    | 4.66E-09    |
| ENSG00000111817.16 | DSE       | 1598.554781 | 1.582824787 | 0.342883919 | 4.61621178  | 3.91E-06    | 0.000257145 |
| ENSG00000137462.6  | TLR2      | 215.921105  | 1.573782655 | 0.432038104 | 3.64269411  | 0.000269799 | 0.006450004 |
| ENSG00000166165.12 | CKB       | 208.8722849 | 1.571080944 | 0.502115022 | 3.128926393 | 0.001754463 | 0.024991073 |
| ENSG00000215045.8  | GRID2IP   | 73.59028093 | 1.568175446 | 0.293926356 | 5.335266525 | 9.54E-08    | 1.28E-05    |
| ENSG00000171860.4  | C3AR1     | 590.6581125 | 1.563435716 | 0.439356875 | 3.558464213 | 0.00037303  | 0.008308597 |
| ENSG00000076706.15 | MCAM      | 351.4856969 | 1.561073674 | 0.257679155 | 6.058207043 | 1.38E-09    | 3.53E-07    |
| ENSG00000140465.13 | CYP1A1    | 99.0770446  | 1.559038534 | 0.388484098 | 4.013133462 | 5.99E-05    | 0.002066019 |
| ENSG00000113758.13 | DBN1      | 167.5359191 | 1.555338924 | 0.393149217 | 3.956103324 | 7.62E-05    | 0.00248354  |
| ENSG00000143878.9  | RHOB      | 6736.268127 | 1.550643433 | 0.360523279 | 4.301091004 | 1.70E-05    | 0.000794103 |
| ENSG00000196872.11 | KIAA1211L | 107.3875195 | 1.546920825 | 0.195741838 | 7.902862472 | 2.73E-15    | 2.61E-12    |
| ENSG00000150457.8  | LATS2     | 229.1361132 | 1.546225807 | 0.449927831 | 3.436608497 | 0.000589046 | 0.011789337 |
| ENSG00000146250.6  | PRSS35    | 138.0950663 | 1.53119047  | 0.536586747 | 2.853574895 | 0.004323034 | 0.045395018 |
| ENSG00000107130.9  | NCS1      | 76.07587974 | 1.525991037 | 0.477120932 | 3.198331772 | 0.001382252 | 0.021365319 |
| ENSG00000080573.6  | COL5A3    | 7483.060162 | 1.505875953 | 0.528507231 | 2.849300565 | 0.004381547 | 0.045774876 |
| ENSG00000145990.10 | GFOD1     | 164.6112713 | 1.502614239 | 0.341821879 | 4.395898364 | 1.10E-05    | 0.000575406 |
| ENSG00000167613.15 | LAIR1     | 505.5703063 | 1.487835258 | 0.417753722 | 3.56151287  | 0.000368724 | 0.008251135 |
| ENSG00000090104.11 | RGS1      | 8178.659776 | 1.469056165 | 0.391501636 | 3.752362777 | 0.000175176 | 0.004610496 |
| ENSG00000115009.11 | CCL20     | 1051.81954  | 1.468489268 | 0.329959218 | 4.450517475 | 8.57E-06    | 0.000475866 |
| ENSG00000071539.13 | TRIP13    | 44.72352397 | 1.466182911 | 0.406939399 | 3.602951484 | 0.000314624 | 0.007269647 |
| ENSG00000139200.13 | PIANP     | 299.3338836 | 1.446088185 | 0.389402456 | 3.713608281 | 0.000204325 | 0.00519652  |
| ENSG00000173585.15 | CCR9      | 2922.461    | 1.443770973 | 0.409101458 | 3.529126929 | 0.000416933 | 0.009088888 |
| ENSG00000206013.2  | IFITM5    | 175.5237576 | 1.44223757  | 0.362236591 | 3.981479528 | 6.85E-05    | 0.002271145 |
| ENSG00000134802.17 | SLC43A3   | 421.994912  | 1.438242801 | 0.311930114 | 4.610785347 | 4.01E-06    | 0.000260711 |
| ENSG00000182621.17 | PLCB1     | 425.8716652 | 1.437045402 | 0.368339264 | 3.901417916 | 9.56E-05    | 0.002982021 |
| ENSG00000138670.17 | RASGEF1B  | 1090.09913  | 1.406956528 | 0.33354679  | 4.218168398 | 2.46E-05    | 0.001060917 |
| ENSG00000178053.17 | MLF1      | 158.5858301 | 1.401235738 | 0.303498127 | 4.616950202 | 3.89E-06    | 0.000257145 |
| ENSG00000075651.15 | PLD1      | 195.9355963 | 1.399524793 | 0.4908523   | 2.851213681 | 0.004355269 | 0.045533512 |
| ENSG00000088826.17 | SMOX      | 920.5811335 | 1.394796864 | 0.333298669 | 4.184825782 | 2.85E-05    | 0.001193458 |
| ENSG00000160183.13 | TMPRSS3   | 404.014634  | 1.380398254 | 0.275091301 | 5.017964035 | 5.22E-07    | 5.39E-05    |
| ENSG00000186654.20 | PRR5      | 1003.978371 | 1.364027287 | 0.209959728 | 6.496613888 | 8.21E-11    | 3.37E-08    |
| ENSG00000173868.11 | PHOSPHO1  | 80.56729881 | 1.360007661 | 0.407306786 | 3.339025295 | 0.000840729 | 0.014980643 |
| ENSG00000256235.1  | SMIM3     | 918.6427636 | 1.357047986 | 0.261281293 | 5.193819929 | 2.06E-07    | 2.44E-05    |
| ENSG00000167291.15 | TBC1D16   | 329.0257259 | 1.35314332  | 0.30053936  | 4.502383056 | 6.72E-06    | 0.000392248 |
| ENSG00000037280.15 | FLT4      | 214.9027435 | 1.352689057 | 0.39734019  | 3.404360016 | 0.000663193 | 0.012837838 |
| ENSG00000215529.12 | EFCAB8    | 107.557233  | 1.342419259 | 0.307622473 | 4.363853024 | 1.28E-05    | 0.000647718 |
| ENSG00000120129.5  | DUSP1     | 10048.01166 | 1.342374808 | 0.287073044 | 4.676074032 | 2.92E-06    | 0.000203012 |
| ENSG00000120318.15 | ARAP3     | 1231.999615 | 1.341564116 | 0.385922219 | 3.476255192 | 0.000508468 | 0.010479121 |
| ENSG00000170819.4  | BFSP2     | 59.98389095 | 1.329907242 | 0.242472799 | 5.484768791 | 4.14E-08    | 6.32E-06    |
| ENSG00000160469.16 | BRSK1     | 124.5371291 | 1.325415225 | 0.237462086 | 5.581586716 | 2.38E-08    | 3.92E-06    |

|                    |          |             |             |             |             |             |             |
|--------------------|----------|-------------|-------------|-------------|-------------|-------------|-------------|
| ENSG00000129244.8  | ATP1B2   | 22.57469159 | 1.322440007 | 0.421574796 | 3.136904811 | 0.001707416 | 0.024589526 |
| ENSG00000125657.4  | TNFSF9   | 36.46502554 | 1.318461785 | 0.423070097 | 3.116414503 | 0.001830648 | 0.025643368 |
| ENSG00000169583.12 | CLIC3    | 303.644538  | 1.315065701 | 0.413188611 | 3.182724946 | 0.001458961 | 0.022215862 |
| ENSG00000182511.11 | FES      | 583.2106114 | 1.310727045 | 0.339962719 | 3.8555023   | 0.000115492 | 0.003401685 |
| ENSG00000185924.6  | RTN4RL1  | 50.02892345 | 1.305534771 | 0.338139036 | 3.860940709 | 0.000112951 | 0.003340564 |
| ENSG00000125462.16 | C1orf61  | 69.88396531 | 1.279433923 | 0.379219164 | 3.373864099 | 0.00074121  | 0.013807674 |
| ENSG00000143507.17 | DUSP10   | 1266.576516 | 1.279069977 | 0.318859978 | 4.011384508 | 6.04E-05    | 0.002076396 |
| ENSG00000135253.13 | KCP      | 43.84691768 | 1.278305617 | 0.373722961 | 3.420463155 | 0.000625146 | 0.012300541 |
| ENSG00000136193.16 | SCRN1    | 716.847532  | 1.27795689  | 0.264983286 | 4.822783006 | 1.42E-06    | 0.000117379 |
| ENSG00000167513.8  | CDT1     | 58.71626844 | 1.271504733 | 0.429510667 | 2.96035659  | 0.003072831 | 0.036217498 |
| ENSG00000143061.17 | IGSF3    | 31.9623738  | 1.258003205 | 0.367771588 | 3.420610092 | 0.000624808 | 0.012300541 |
| ENSG00000099282.9  | TSPAN15  | 154.3542954 | 1.256595715 | 0.374523589 | 3.355184437 | 0.000793121 | 0.014418917 |
| ENSG00000115828.15 | QPCT     | 202.2823274 | 1.24998114  | 0.335299615 | 3.727952808 | 0.000193042 | 0.004962343 |
| ENSG00000184730.10 | APOBR    | 1923.189322 | 1.246896153 | 0.21684894  | 5.750068012 | 8.92E-09    | 1.71E-06    |
| ENSG00000174307.6  | PHLDA3   | 555.283     | 1.246189971 | 0.26017347  | 4.789842597 | 1.67E-06    | 0.000134505 |
| ENSG00000154229.11 | PRKCA    | 2355.338672 | 1.245619193 | 0.232190183 | 5.364650559 | 8.11E-08    | 1.12E-05    |
| ENSG00000151117.8  | TMEM86A  | 85.9939     | 1.243547129 | 0.367244751 | 3.386153579 | 0.000708797 | 0.013360033 |
| ENSG00000100906.10 | NFKBIA   | 21709.8045  | 1.240518228 | 0.323458324 | 3.83517175  | 0.000125477 | 0.003605457 |
| ENSG00000237693.4  | IRGM     | 68.37622708 | 1.23213877  | 0.337610149 | 3.649590437 | 0.000262659 | 0.006342723 |
| ENSG00000131080.14 | EDA2R    | 69.47381668 | 1.226455092 | 0.340520601 | 3.601706001 | 0.000316136 | 0.007290436 |
| ENSG00000121797.9  | CCRL2    | 89.76861059 | 1.220792742 | 0.364167443 | 3.352284137 | 0.000801477 | 0.014497337 |
| ENSG00000109471.4  | IL2      | 272.8474718 | 1.215636849 | 0.384698111 | 3.159976132 | 0.001577821 | 0.02342884  |
| ENSG00000177875.4  | CCDC184  | 369.4784195 | 1.21521918  | 0.328893252 | 3.694874162 | 0.000219996 | 0.005516816 |
| ENSG00000154240.16 | CEP112   | 100.3950281 | 1.213186468 | 0.322743348 | 3.758982097 | 0.000170606 | 0.004523425 |
| ENSG00000125266.6  | EFNB2    | 33.14653777 | 1.212659015 | 0.379758343 | 3.193238645 | 0.001406866 | 0.021629249 |
| ENSG00000228278.3  | ORM2     | 198.3236865 | 1.210013388 | 0.41454929  | 2.918864937 | 0.003513084 | 0.039772436 |
| ENSG00000162783.10 | IER5     | 5999.381823 | 1.207465849 | 0.194628652 | 6.20394703  | 5.51E-10    | 1.68E-07    |
| ENSG00000125740.13 | FOSB     | 14716.86405 | 1.195526712 | 0.342956006 | 3.485947734 | 0.000490397 | 0.010239086 |
| ENSG00000177374.12 | HIC1     | 2340.244673 | 1.193994604 | 0.252538063 | 4.727978778 | 2.27E-06    | 0.000169413 |
| ENSG00000048052.21 | HDAC9    | 201.6375647 | 1.189561773 | 0.384410986 | 3.094505145 | 0.001971415 | 0.027086187 |
| ENSG00000188483.7  | IER5L    | 136.7039893 | 1.176752359 | 0.385554153 | 3.052106563 | 0.002272414 | 0.029760205 |
| ENSG00000152684.10 | PELO     | 1691.493521 | 1.175961498 | 0.366903451 | 3.205097948 | 0.001350165 | 0.021027981 |
| ENSG00000141682.11 | PMAIP1   | 959.8103203 | 1.175513228 | 0.335994878 | 3.498604605 | 0.0004677   | 0.009928392 |
| ENSG00000147889.17 | CDKN2A   | 281.7188874 | 1.174918015 | 0.261464203 | 4.493609457 | 7.00E-06    | 0.000403404 |
| ENSG00000140859.15 | KIFC3    | 392.8760988 | 1.171463966 | 0.387097212 | 3.026278488 | 0.002475842 | 0.031400063 |
| ENSG00000155265.10 | GOLGA7B  | 420.875357  | 1.169325576 | 0.159802127 | 7.317334227 | 2.53E-13    | 1.81E-10    |
| ENSG00000146670.9  | CDCA5    | 58.92777261 | 1.168274766 | 0.372283106 | 3.138135321 | 0.001700264 | 0.024585263 |
| ENSG00000151062.14 | CACNA2D4 | 660.0142938 | 1.159838668 | 0.166527643 | 6.964841666 | 3.29E-12    | 1.89E-09    |
| ENSG00000075702.16 | WDR62    | 348.2990919 | 1.14601192  | 0.296370227 | 3.866825395 | 0.000110261 | 0.003281303 |
| ENSG00000122877.14 | EGR2     | 171.8061143 | 1.145480087 | 0.379911441 | 3.015123953 | 0.002568743 | 0.032095856 |
| ENSG00000111012.9  | CYP27B1  | 144.1493606 | 1.139314865 | 0.339278882 | 3.358048276 | 0.000784949 | 0.014361363 |
| ENSG00000124762.13 | CDKN1A   | 2893.986012 | 1.128842857 | 0.357411428 | 3.158384895 | 0.001586459 | 0.023462759 |
| ENSG00000174871.10 | CNIH2    | 176.0716696 | 1.127179647 | 0.317702486 | 3.547909438 | 0.000388302 | 0.008582126 |
| ENSG00000206561.12 | COLQ     | 274.8771051 | 1.123814378 | 0.300620532 | 3.738315442 | 0.000185257 | 0.004819883 |
| ENSG00000079819.17 | EPB41L2  | 416.8071596 | 1.110723195 | 0.333527842 | 3.330226308 | 0.000867754 | 0.015291237 |
| ENSG00000206560.11 | ANKRD28  | 2762.349288 | 1.109923943 | 0.203162783 | 5.463224732 | 4.68E-08    | 7.06E-06    |
| ENSG00000080823.21 | MOK      | 93.09216748 | 1.107003534 | 0.273274532 | 4.050884386 | 5.10E-05    | 0.001834321 |
| ENSG00000187240.13 | DYNC2H1  | 232.6475089 | 1.105458983 | 0.278376888 | 3.97108751  | 7.15E-05    | 0.002353774 |

|                    |             |             |             |             |             |             |             |
|--------------------|-------------|-------------|-------------|-------------|-------------|-------------|-------------|
| ENSG00000144802.11 | NFKBIZ      | 5872.263938 | 1.104203401 | 0.315892585 | 3.495502754 | 0.00047317  | 0.009967368 |
| ENSG00000061337.15 | LZTS1       | 643.5700579 | 1.101097063 | 0.356311349 | 3.090266602 | 0.001999769 | 0.027266813 |
| ENSG00000105767.2  | CADM4       | 119.4982642 | 1.093087298 | 0.185252297 | 5.900533036 | 3.62E-09    | 8.26E-07    |
| ENSG00000123685.8  | BATF3       | 65.43292885 | 1.092301581 | 0.366931177 | 2.976856835 | 0.0029122   | 0.035032704 |
| ENSG00000163818.16 | LZTFL1      | 1425.387497 | 1.087916247 | 0.256095719 | 4.248084472 | 2.16E-05    | 0.000952119 |
| ENSG00000087074.7  | PPP1R15A    | 39259.60792 | 1.087251721 | 0.28501016  | 3.81478232  | 0.000136303 | 0.003856273 |
| ENSG00000140836.14 | ZFH3        | 150.5180244 | 1.087154574 | 0.268219    | 4.05323476  | 5.05E-05    | 0.00182513  |
| ENSG00000008256.15 | CYTH3       | 3674.335653 | 1.082410831 | 0.265380329 | 4.078715381 | 4.53E-05    | 0.001682828 |
| ENSG00000172602.9  | RND1        | 74.89466369 | 1.077998532 | 0.30557234  | 3.527801414 | 0.000419026 | 0.00911023  |
| ENSG00000184545.10 | DUSP8       | 517.8817338 | 1.070629702 | 0.293264195 | 3.650734454 | 0.000261491 | 0.006325184 |
| ENSG00000104368.17 | PLAT        | 430.0475301 | 1.065366568 | 0.336510664 | 3.165922164 | 0.001545922 | 0.023122731 |
| ENSG00000255274.9  | TMPRSS4-AS1 | 267.0034751 | 1.062044679 | 0.328161984 | 3.236342814 | 0.001210719 | 0.019534928 |
| ENSG00000176834.13 | VSIG10      | 114.6993511 | 1.057655528 | 0.241491342 | 4.379683013 | 1.19E-05    | 0.000611044 |
| ENSG00000179057.13 | IGSF22      | 30.10796333 | 1.053954336 | 0.35418445  | 2.975721647 | 0.002923    | 0.035056453 |
| ENSG00000120278.15 | PLEKHG1     | 971.3104204 | 1.049539918 | 0.336763591 | 3.116548068 | 0.001829818 | 0.025643368 |
| ENSG00000085563.14 | ABCB1       | 3625.846948 | 1.048512153 | 0.261217845 | 4.01393769  | 5.97E-05    | 0.00206395  |
| ENSG00000166963.12 | MAP1A       | 202.9152374 | 1.038558403 | 0.281299197 | 3.692006287 | 0.000222492 | 0.005559973 |
| ENSG00000171444.17 | MCC         | 406.5878095 | 1.036859247 | 0.287633552 | 3.604792411 | 0.000312403 | 0.007250974 |
| ENSG00000100599.15 | RIN3        | 1075.408983 | 1.035798121 | 0.286475387 | 3.615661829 | 0.000299581 | 0.00703305  |
| ENSG00000101000.5  | PROCR       | 55.30853354 | 1.034413545 | 0.332573226 | 3.110333194 | 0.001868764 | 0.026052633 |
| ENSG00000115902.10 | SLC1A4      | 2361.935181 | 1.031880282 | 0.324028002 | 3.184540461 | 0.00144984  | 0.022123948 |
| ENSG00000108798.8  | ABI3        | 1271.454714 | 1.029090556 | 0.273714455 | 3.759723082 | 0.000170102 | 0.004518401 |
| ENSG00000185010.13 | F8          | 315.2126882 | 1.027220848 | 0.210378258 | 4.882732934 | 1.05E-06    | 9.26E-05    |
| ENSG00000088727.12 | KIF9        | 88.9052331  | 1.026559756 | 0.278866042 | 3.681193118 | 0.000232145 | 0.005751104 |
| ENSG00000169026.12 | MFSD7       | 80.59086347 | 1.026224677 | 0.281256517 | 3.648714305 | 0.000263556 | 0.006353693 |
| ENSG00000151014.5  | NOCT        | 120.343456  | 1.025252194 | 0.310513814 | 3.301792538 | 0.000960691 | 0.016542799 |
| ENSG00000188211.8  | NCR3LG1     | 209.7365377 | 1.02364619  | 0.340643592 | 3.005035805 | 0.002655496 | 0.032950201 |
| ENSG00000137965.10 | IFI44       | 2138.318469 | 1.023096013 | 0.301299212 | 3.395614632 | 0.000684747 | 0.01306252  |
| ENSG00000106665.15 | CLIP2       | 775.1053609 | 1.021434277 | 0.247951787 | 4.11948746  | 3.80E-05    | 0.001480067 |
| ENSG00000174791.10 | RIN1        | 154.9948677 | 1.020488754 | 0.344425412 | 2.962873003 | 0.003047823 | 0.035981869 |
| ENSG00000167664.8  | TMIGD2      | 1793.038091 | 1.017180197 | 0.310452195 | 3.276447105 | 0.00105122  | 0.017656557 |
| ENSG00000151689.12 | INPP1       | 345.8981906 | 1.016366146 | 0.201322582 | 5.048445812 | 4.45E-07    | 4.80E-05    |
| ENSG00000167083.6  | GNGT2       | 109.7404432 | 1.014733775 | 0.305584583 | 3.320631447 | 0.000898141 | 0.015648407 |
| ENSG00000175556.16 | LONRF3      | 407.1900852 | 1.010422335 | 0.219848795 | 4.595987595 | 4.31E-06    | 0.00027216  |
| ENSG00000145391.13 | SETD7       | 2009.85126  | 1.010265485 | 0.285058128 | 3.544068338 | 0.000394003 | 0.008668068 |
| ENSG00000165914.14 | TTC7B       | 103.199839  | 1.007612669 | 0.339477014 | 2.968132234 | 0.002996154 | 0.035665422 |
| ENSG00000163923.9  | RPL39L      | 139.6938207 | 1.004974062 | 0.242057593 | 4.151797307 | 3.30E-05    | 0.001325206 |
| ENSG00000180530.10 | NRIP1       | 2277.277508 | 1.001017956 | 0.221848383 | 4.512171521 | 6.42E-06    | 0.000378772 |

**Table S9 B: down-regulated genes in intestinal pTh17-cells as compared to all other CCR6<sup>+</sup>Th subsets**

| Gene_id            | Gene_name     | baseMean    | log2FoldChange | lfcSE       | stat         | pvalue      | padj        |
|--------------------|---------------|-------------|----------------|-------------|--------------|-------------|-------------|
| ENSG00000138795.9  | LEF1          | 3288.262823 | -4.743993821   | 0.436312125 | -10.87293601 | 1.55E-27    | 2.23E-23    |
| ENSG00000182463.15 | TSHZ2         | 222.8104845 | -4.734235411   | 0.986754977 | -4.797782144 | 1.60E-06    | 0.000130752 |
| ENSG00000137474.19 | MYO7A         | 587.0363055 | -4.716188469   | 0.841658551 | -5.603446272 | 2.10E-08    | 3.55E-06    |
| ENSG00000186810.7  | CXCR3         | 3506.145553 | -4.576333521   | 1.190790835 | -3.84310442  | 0.000121488 | 0.003541911 |
| ENSG00000188404.8  | SELL          | 1880.019099 | -4.341545266   | 0.921353774 | -4.712137065 | 2.45E-06    | 0.000177585 |
| ENSG00000141753.6  | IGFBP4        | 2116.632654 | -4.258165333   | 0.661800228 | -6.43421557  | 1.24E-10    | 4.56E-08    |
| ENSG00000152969.17 | JAKMIP1       | 274.5123134 | -4.086081887   | 0.87355332  | -4.677541479 | 2.90E-06    | 0.000203012 |
| ENSG00000156299.13 | TIAM1         | 651.0678922 | -4.014682042   | 0.403491749 | -9.949849174 | 2.53E-23    | 1.81E-19    |
| ENSG00000166105.15 | GLB1L3        | 271.9393087 | -3.748648463   | 0.642980689 | -5.830110499 | 5.54E-09    | 1.18E-06    |
| ENSG00000124191.17 | TOX2          | 464.7711582 | -3.622721113   | 0.641347431 | -5.648609378 | 1.62E-08    | 2.94E-06    |
| ENSG00000156234.7  | CXCL13        | 409.3276446 | -3.455246377   | 1.033567851 | -3.343028109 | 0.000828695 | 0.014821449 |
| ENSG00000116106.11 | EPHA4         | 735.8712913 | -3.360850264   | 0.580638851 | -5.788193918 | 7.11E-09    | 1.44E-06    |
| ENSG00000116574.5  | RHOU          | 388.8021531 | -3.298900727   | 1.0115153   | -3.261345358 | 0.001108849 | 0.018324112 |
| ENSG00000172292.14 | CERS6         | 178.5896585 | -3.283610001   | 0.501208773 | -6.551381736 | 5.70E-11    | 2.41E-08    |
| ENSG00000107281.9  | NPDC1         | 388.1337076 | -3.261606082   | 0.672850693 | -4.847444044 | 1.25E-06    | 0.00010608  |
| ENSG00000134198.9  | TSPAN2        | 130.1179239 | -3.205158639   | 0.602729029 | -5.317743933 | 1.05E-07    | 1.36E-05    |
| ENSG00000103522.15 | IL21R         | 728.9844763 | -3.18407944    | 0.392437765 | -8.113590798 | 4.91E-16    | 5.87E-13    |
| ENSG00000182230.11 | FAM153B       | 142.0926762 | -3.178085218   | 0.514902883 | -6.172203187 | 6.73E-10    | 1.97E-07    |
| ENSG00000118263.14 | KLF7          | 279.9951417 | -3.172813346   | 0.435707934 | -7.281972849 | 3.29E-13    | 2.25E-10    |
| ENSG00000126353.3  | CCR7          | 3444.087397 | -3.151584957   | 0.632693758 | -4.981217086 | 6.32E-07    | 6.34E-05    |
| ENSG00000131398.13 | KCNC3         | 263.9191631 | -3.150023083   | 0.391561031 | -8.044781873 | 8.64E-16    | 8.85E-13    |
| ENSG00000186854.10 | TRABD2A       | 599.6395865 | -2.999275836   | 0.409777968 | -7.319270602 | 2.49E-13    | 1.81E-10    |
| ENSG00000135821.17 | GLUL          | 2763.941929 | -2.924882038   | 0.593257008 | -4.930210679 | 8.21E-07    | 7.65E-05    |
| ENSG00000109956.12 | B3GAT1        | 137.9765636 | -2.880766855   | 0.744530027 | -3.869242004 | 0.000109174 | 0.003276141 |
| ENSG00000196126.10 | HLA-DRB1      | 241.3433864 | -2.88075861    | 0.942419497 | -3.0567689   | 0.002237367 | 0.029497052 |
| ENSG00000146216.11 | TTBK1         | 104.8958679 | -2.823112389   | 0.652869314 | -4.324161556 | 1.53E-05    | 0.000734533 |
| ENSG00000080854.14 | IGSF9B        | 378.4804582 | -2.808664343   | 0.648621616 | -4.330204657 | 1.49E-05    | 0.000719474 |
| ENSG00000170989.8  | S1PR1         | 2606.256623 | -2.790620414   | 0.553546974 | -5.041343457 | 4.62E-07    | 4.90E-05    |
| ENSG00000263264.1  | CTB-133G6.1   | 417.8211195 | -2.785909895   | 0.494394535 | -5.634993304 | 1.75E-08    | 3.03E-06    |
| ENSG00000261371.5  | PECAM1        | 183.8964229 | -2.758486049   | 0.891644257 | -3.093706965 | 0.001976726 | 0.027103255 |
| ENSG00000183813.6  | CCR4          | 2444.443604 | -2.745334471   | 0.76248873  | -3.600491866 | 0.000317616 | 0.007301091 |
| ENSG00000136250.11 | AOAH          | 446.567238  | -2.729012407   | 0.682863402 | -3.996425053 | 6.43E-05    | 0.002185802 |
| ENSG00000185989.10 | RASA3         | 2434.460044 | -2.712791432   | 0.385623177 | -7.034824658 | 2.00E-12    | 1.24E-09    |
| ENSG00000186310.9  | NAP1L3        | 111.2207774 | -2.694586673   | 0.478216687 | -5.634656314 | 1.75E-08    | 3.03E-06    |
| ENSG00000149328.14 | GLB1L2        | 823.2495193 | -2.650702145   | 0.866460941 | -3.059228663 | 0.002219077 | 0.029422342 |
| ENSG00000137936.16 | BCAR3         | 115.1486374 | -2.633334561   | 0.897021474 | -2.935642721 | 0.003328575 | 0.038411161 |
| ENSG00000148053.15 | NTRK2         | 276.1923049 | -2.622792394   | 0.52435604  | -5.00193036  | 5.68E-07    | 5.82E-05    |
| ENSG00000008441.16 | NFIX          | 134.289097  | -2.536426497   | 0.608227193 | -4.170195818 | 3.04E-05    | 0.00124095  |
| ENSG00000160255.17 | ITGB2         | 7547.878738 | -2.485772787   | 0.301829803 | -8.235677074 | 1.79E-16    | 2.85E-13    |
| ENSG00000196218.12 | RYR1          | 1591.154078 | -2.475162075   | 0.392788168 | -6.301518933 | 2.95E-10    | 9.83E-08    |
| ENSG00000166503.8  | RP11-382A20.3 | 363.8139886 | -2.47082947    | 0.657649205 | -3.757062964 | 0.000171919 | 0.004549833 |
| ENSG00000184613.10 | NELL2         | 3117.827838 | -2.469655435   | 0.554024692 | -4.457663116 | 8.29E-06    | 0.000466084 |
| ENSG00000132694.18 | ARHGEF11      | 161.6979046 | -2.465845907   | 0.760463042 | -3.242558511 | 0.001184616 | 0.019227077 |
| ENSG00000182272.11 | B4GALNT4      | 168.0747506 | -2.465026302   | 0.525214595 | -4.693369772 | 2.69E-06    | 0.000190164 |
| ENSG00000135925.8  | WNT10A        | 109.0591507 | -2.461045855   | 0.556223554 | -4.42456246  | 9.66E-06    | 0.000521118 |

|                    |            |             |              |             |              |             |             |
|--------------------|------------|-------------|--------------|-------------|--------------|-------------|-------------|
| ENSG00000204219.9  | TCEA3      | 113.1281689 | -2.456563971 | 0.533722911 | -4.602695371 | 4.17E-06    | 0.000265879 |
| ENSG00000179583.18 | CIITA      | 401.2020559 | -2.453517657 | 0.827495646 | -2.964991623 | 0.003026912 | 0.035878897 |
| ENSG00000104361.9  | NIPAL2     | 69.64933281 | -2.441209911 | 0.582733089 | -4.189241968 | 2.80E-05    | 0.001173892 |
| ENSG00000102349.16 | KLF8       | 107.8081117 | -2.436605306 | 0.446766295 | -5.453870025 | 4.93E-08    | 7.36E-06    |
| ENSG00000135678.11 | CPM        | 93.11924287 | -2.407140477 | 0.594446176 | -4.049383403 | 5.14E-05    | 0.00184151  |
| ENSG00000067840.12 | PDZD4      | 109.1711369 | -2.394491698 | 0.527223244 | -4.541703586 | 5.58E-06    | 0.000342908 |
| ENSG00000163545.8  | NUAK2      | 488.2553937 | -2.340062169 | 0.361185957 | -6.478829326 | 9.24E-11    | 3.68E-08    |
| ENSG00000120885.20 | CLU        | 1543.245803 | -2.317499137 | 0.728451312 | -3.181405676 | 0.001465622 | 0.022270008 |
| ENSG00000050327.14 | ARHGEF5    | 84.1394807  | -2.314676008 | 0.284571714 | -8.133893473 | 4.16E-16    | 5.42E-13    |
| ENSG00000166833.19 | NAV2       | 96.4929618  | -2.307034107 | 0.523810507 | -4.404329575 | 1.06E-05    | 0.000562626 |
| ENSG00000144354.13 | CDCA7      | 1083.082527 | -2.289772534 | 0.73741003  | -3.105155124 | 0.001901793 | 0.026407853 |
| ENSG00000135114.12 | OASL       | 953.7065508 | -2.284936916 | 0.736374182 | -3.102956312 | 0.001915979 | 0.026527805 |
| ENSG00000128656.13 | CHN1       | 969.5033405 | -2.283347063 | 0.679452923 | -3.360566987 | 0.000777827 | 0.014249228 |
| ENSG00000166405.14 | RIC3       | 256.889355  | -2.281072234 | 0.495335182 | -4.605108451 | 4.12E-06    | 0.000265172 |
| ENSG00000160712.12 | IL6R       | 2497.945713 | -2.263240139 | 0.625155398 | -3.620284086 | 0.00029428  | 0.006954116 |
| ENSG00000116690.12 | PRG4       | 77.33469307 | -2.203382095 | 0.648892182 | -3.395605861 | 0.000684769 | 0.01306252  |
| ENSG00000132359.14 | RAP1GAP2   | 398.1428457 | -2.183024649 | 0.639814535 | -3.411964761 | 0.000644965 | 0.012586899 |
| ENSG00000159640.15 | ACE        | 769.2800904 | -2.172347815 | 0.387596997 | -5.60465595  | 2.09E-08    | 3.55E-06    |
| ENSG00000186265.9  | BTLA       | 285.3439909 | -2.161319155 | 0.381177128 | -5.670117629 | 1.43E-08    | 2.66E-06    |
| ENSG00000118402.5  | ELOVL4     | 199.2896925 | -2.160754142 | 0.555342226 | -3.890851517 | 9.99E-05    | 0.00307482  |
| ENSG00000152782.16 | PANK1      | 149.4054625 | -2.15829981  | 0.469255079 | -4.599417045 | 4.24E-06    | 0.000268902 |
| ENSG00000172794.19 | RAB37      | 2650.108297 | -2.136878977 | 0.343947763 | -6.212800906 | 5.20E-10    | 1.62E-07    |
| ENSG00000140545.14 | MFGE8      | 364.8779521 | -2.116260443 | 0.431754011 | -4.901542055 | 9.51E-07    | 8.47E-05    |
| ENSG00000092096.15 | SLC22A17   | 71.74946349 | -2.115221133 | 0.524533418 | -4.032576499 | 5.52E-05    | 0.001930095 |
| ENSG00000070526.14 | ST6GALNAC1 | 213.4244585 | -2.109916822 | 0.529185732 | -3.987100734 | 6.69E-05    | 0.00225213  |
| ENSG00000173218.14 | VANGL1     | 108.2349708 | -2.099823829 | 0.431691582 | -4.864175992 | 1.15E-06    | 0.000100526 |
| ENSG00000160856.20 | FCRL3      | 83.05903278 | -2.080952437 | 0.4637212   | -4.487507662 | 7.21E-06    | 0.000413458 |
| ENSG00000180543.4  | TSPYL5     | 63.37923821 | -2.070596053 | 0.414228579 | -4.998679852 | 5.77E-07    | 5.87E-05    |
| ENSG00000173198.5  | CYSLTR1    | 299.2795305 | -2.058856176 | 0.688551971 | -2.990124584 | 0.002788637 | 0.033956033 |
| ENSG00000119408.16 | NEK6       | 134.1551548 | -2.020004314 | 0.499683966 | -4.042563802 | 5.29E-05    | 0.001874977 |
| ENSG00000100311.16 | PDGFB      | 105.6093737 | -1.983007674 | 0.343687965 | -5.76979085  | 7.94E-09    | 1.56E-06    |
| ENSG00000188322.4  | SBK1       | 419.9796616 | -1.97022242  | 0.444709248 | -4.430360805 | 9.41E-06    | 0.000509215 |
| ENSG00000104689.9  | TNFRSF10A  | 593.5665061 | -1.969190018 | 0.259332847 | -7.593291947 | 3.12E-14    | 2.63E-11    |
| ENSG00000131746.12 | TNS4       | 72.08035919 | -1.95896982  | 0.495077436 | -3.956895782 | 7.59E-05    | 0.00248354  |
| ENSG00000173482.16 | PTPRM      | 2122.60124  | -1.945641641 | 0.441458878 | -4.407299838 | 1.05E-05    | 0.000558122 |
| ENSG00000133069.15 | TMCC2      | 111.486512  | -1.941772324 | 0.503883435 | -3.853614131 | 0.000116387 | 0.003414018 |
| ENSG00000110987.8  | BCL7A      | 29.04992593 | -1.933466945 | 0.568241399 | -3.402545026 | 0.000667614 | 0.012905995 |
| ENSG00000088992.17 | TESC       | 204.5903518 | -1.9320111   | 0.544039987 | -3.551229959 | 0.000383435 | 0.008500765 |
| ENSG00000128536.15 | CDHR3      | 74.12517198 | -1.926051167 | 0.460680488 | -4.180882882 | 2.90E-05    | 0.001207305 |
| ENSG00000181804.14 | SLC9A9     | 575.2592584 | -1.912386208 | 0.286184724 | -6.682349011 | 2.35E-11    | 1.09E-08    |
| ENSG00000168824.14 | NSG1       | 934.3937716 | -1.852767483 | 0.326677405 | -5.671550751 | 1.42E-08    | 2.66E-06    |
| ENSG00000149212.11 | SESN3      | 2247.121847 | -1.852381165 | 0.341284861 | -5.427668727 | 5.71E-08    | 8.11E-06    |
| ENSG00000110777.11 | POU2AF1    | 180.8358715 | -1.830411425 | 0.423660494 | -4.32046757  | 1.56E-05    | 0.000741975 |
| ENSG00000147408.14 | CSGALNACT1 | 178.8125783 | -1.802466518 | 0.409334693 | -4.403405206 | 1.07E-05    | 0.000562626 |
| ENSG00000131370.15 | SH3BP5     | 288.5203935 | -1.79589248  | 0.42400675  | -4.235528044 | 2.28E-05    | 0.000994119 |
| ENSG00000072163.19 | LIMS2      | 98.64088962 | -1.78667576  | 0.477546726 | -3.741363226 | 0.000183025 | 0.004780923 |
| ENSG00000139193.3  | CD27       | 610.3281062 | -1.781593301 | 0.287649739 | -6.193620426 | 5.88E-10    | 1.76E-07    |
| ENSG00000044459.14 | CNTLN      | 41.60686571 | -1.780479505 | 0.612896326 | -2.905025581 | 0.003672231 | 0.041023738 |



|                    |          |             |              |              |              |             |             |
|--------------------|----------|-------------|--------------|--------------|--------------|-------------|-------------|
| ENSG00000163082.9  | SGPP2    | 638.2869215 | -1.77476355  | 0.393851911  | -4.506169709 | 6.60E-06    | 0.000388042 |
| ENSG00000105173.13 | CCNE1    | 72.0867536  | -1.750775424 | 0.492498302  | -3.554886213 | 0.000378143 | 0.008396407 |
| ENSG00000101842.13 | VSIG1    | 244.226599  | -1.729506208 | 0.373412922  | -4.631618533 | 3.63E-06    | 0.000244332 |
| ENSG00000104903.4  | LYL1     | 106.2509317 | -1.725197531 | 0.397732178  | -4.337586008 | 1.44E-05    | 0.000710083 |
| ENSG00000124496.12 | TRERF1   | 5279.964623 | -1.721443688 | 0.409257076  | -4.206264933 | 2.60E-05    | 0.001105066 |
| ENSG00000128578.9  | STRIP2   | 81.73256111 | -1.713981758 | 0.566582598  | -3.02512249  | 0.002485325 | 0.031415848 |
| ENSG00000013619.13 | MAML1    | 215.4930986 | -1.709834879 | 0.524965401  | -3.257042991 | 0.001125794 | 0.018476415 |
| ENSG00000087589.16 | CASS4    | 433.5445652 | -1.684473042 | 0.396998555  | -4.243020582 | 2.21E-05    | 0.000970337 |
| ENSG00000198915.11 | RASGEF1A | 175.4470248 | -1.677048974 | 0.448702325  | -3.737553565 | 0.00018582  | 0.004819883 |
| ENSG00000176533.12 | GNG7     | 389.2352459 | -1.667304762 | 0.428729064  | -3.88894736  | 0.00010068  | 0.003092405 |
| ENSG00000101004.14 | NINL     | 243.1685648 | -1.641044849 | 0.181239805  | -9.054549866 | 1.37E-19    | 6.56E-16    |
| ENSG00000184524.5  | CEND1    | 100.9928291 | -1.639610706 | 0.581843265  | -2.817959416 | 0.004832992 | 0.048751361 |
| ENSG00000187231.13 | SESTD1   | 212.8931636 | -1.635958662 | 0.392311151  | -4.170053942 | 3.05E-05    | 0.00124095  |
| ENSG00000198794.11 | SCAMP5   | 52.36204821 | -1.627747744 | 0.469255075  | -3.468790919 | 0.000522806 | 0.010728371 |
| ENSG00000006704.10 | GTF2IRD1 | 107.5658289 | -1.606536981 | 0.43973383   | -3.653430485 | 0.00025876  | 0.006302919 |
| ENSG00000034053.14 | APBA2    | 1300.977216 | -1.581412878 | 0.208899955  | -7.570192515 | 3.73E-14    | 2.97E-11    |
| ENSG00000122547.10 | EEPD1    | 318.4625072 | -1.575671734 | 0.428443217  | -3.677667592 | 0.000235376 | 0.005821102 |
| ENSG00000157570.11 | TSPAN18  | 329.5200869 | -1.571535555 | 0.438399736  | -3.584709174 | 0.000337454 | 0.007671063 |
| ENSG00000083290.19 | ULK2     | 355.4047356 | -1.56123371  | 0.310722192  | -5.024532359 | 5.05E-07    | 5.25E-05    |
| ENSG00000212916.4  | MAP10    | 94.7686769  | -1.550417918 | 0.425886199  | -3.640451186 | 0.000272161 | 0.006495629 |
| ENSG00000125430.8  | HS3ST3B1 | 308.1363347 | -1.538900968 | 0.333620142  | -4.612733993 | 3.97E-06    | 0.000260292 |
| ENSG00000126822.16 | PLEKHG3  | 974.1328732 | -1.511206298 | 0.352642909  | -4.285372705 | 1.82E-05    | 0.000841421 |
| ENSG00000160284.14 | SPATC1L  | 44.75996867 | -1.506269374 | 0.400613898  | -3.759902943 | 0.000169979 | 0.004518401 |
| ENSG00000176438.12 | SYNE3    | 2013.110323 | -1.491857623 | 0.277600472  | -5.37411774  | 7.70E-08    | 1.07E-05    |
| ENSG00000197077.13 | KIAA1671 | 2062.305551 | -1.490057717 | 0.280169195  | -5.318420962 | 1.05E-07    | 1.36E-05    |
| ENSG00000146776.14 | ATXN7L1  | 880.8261701 | -1.465947617 | 0.240254594  | -6.101642402 | 1.05E-09    | 2.79E-07    |
| ENSG00000174500.12 | GCSAM    | 183.4009087 | -1.461025193 | 0.4077703087 | -3.583551952 | 0.000338953 | 0.007692953 |
| ENSG00000089159.16 | PXN      | 2184.119543 | -1.460492339 | 0.287956259  | -5.071924268 | 3.94E-07    | 4.31E-05    |
| ENSG00000179242.15 | CDH4     | 87.58347215 | -1.44831311  | 0.375340021  | -3.85866955  | 0.000114006 | 0.003364818 |
| ENSG00000114948.12 | ADAM23   | 1107.027954 | -1.436495854 | 0.310888165  | -4.620619298 | 3.83E-06    | 0.000254072 |
| ENSG00000073849.14 | ST6GAL1  | 4344.255685 | -1.430225931 | 0.16710657   | -8.558765399 | 1.14E-17    | 3.27E-14    |
| ENSG00000154589.6  | LY96     | 249.2703133 | -1.42039737  | 0.351587148  | -4.039958162 | 5.35E-05    | 0.00188877  |
| ENSG00000116771.5  | AGMAT    | 120.8626659 | -1.41559554  | 0.373822381  | -3.786813235 | 0.000152592 | 0.00416117  |
| ENSG00000136379.11 | ABHD17C  | 72.3516146  | -1.409442265 | 0.298807588  | -4.716889127 | 2.39E-06    | 0.000175259 |
| ENSG00000104427.11 | ZC2HC1A  | 135.4936669 | -1.384210329 | 0.392937696  | -3.52272216  | 0.000427139 | 0.009255106 |
| ENSG00000170677.5  | SOCS6    | 69.13637197 | -1.382988956 | 0.318511856  | -4.342032896 | 1.41E-05    | 0.000698258 |
| ENSG00000184916.8  | JAG2     | 234.6186293 | -1.371459134 | 0.451995755  | -3.034230118 | 0.002411504 | 0.030856927 |
| ENSG00000066294.14 | CD84     | 2662.886891 | -1.367563192 | 0.251572289  | -5.436064518 | 5.45E-08    | 7.89E-06    |
| ENSG00000064666.14 | CNN2     | 7672.338531 | -1.363742573 | 0.281336267  | -4.84737566  | 1.25E-06    | 0.00010608  |
| ENSG00000112303.13 | VNN2     | 178.7672811 | -1.361783824 | 0.368959268  | -3.690878485 | 0.000223481 | 0.005574974 |
| ENSG00000164687.10 | FABP5    | 162.6796161 | -1.35013235  | 0.465444633  | -2.900736747 | 0.003722865 | 0.041319388 |
| ENSG00000143110.11 | C1orf162 | 486.1120038 | -1.350091047 | 0.446341697  | -3.024792563 | 0.002488037 | 0.031415848 |
| ENSG00000186827.10 | TNFRSF4  | 734.1316698 | -1.335307863 | 0.39889607   | -3.347508193 | 0.000815416 | 0.014657047 |
| ENSG00000197457.9  | STMN3    | 1552.450527 | -1.324970822 | 0.276748021  | -4.787643346 | 1.69E-06    | 0.00013468  |
| ENSG00000172824.14 | CES4A    | 167.7660578 | -1.323786726 | 0.2243573    | -5.900350574 | 3.63E-09    | 8.26E-07    |
| ENSG00000127124.14 | HIVEP3   | 756.8238305 | -1.312046401 | 0.388810738  | -3.374511741 | 0.000739468 | 0.013793138 |
| ENSG00000198814.12 | GK       | 412.2895437 | -1.304383604 | 0.365656791  | -3.567234729 | 0.000360768 | 0.008098373 |
| ENSG00000204271.11 | SPIN3    | 252.2056165 | -1.295827781 | 0.378676098  | -3.421995179 | 0.000621634 | 0.012281984 |

|                    |          |             |              |             |              |             |             |
|--------------------|----------|-------------|--------------|-------------|--------------|-------------|-------------|
| ENSG00000174837.14 | ADGRE1   | 191.6098713 | -1.293316274 | 0.423185763 | -3.05614316  | 0.002242042 | 0.029504447 |
| ENSG00000184557.4  | SOCS3    | 1530.29733  | -1.28762274  | 0.447866214 | -2.875016465 | 0.004040064 | 0.043376259 |
| ENSG00000158050.4  | DUSP2    | 1094.539162 | -1.287252584 | 0.273307626 | -4.709903647 | 2.48E-06    | 0.00017864  |
| ENSG00000101224.17 | CDC25B   | 8090.983161 | -1.268659346 | 0.283101375 | -4.481289952 | 7.42E-06    | 0.000422313 |
| ENSG00000184792.15 | OSBP2    | 137.0952099 | -1.257390502 | 0.309300753 | -4.065268153 | 4.80E-05    | 0.001754309 |
| ENSG00000221890.2  | NPTXR    | 749.4113828 | -1.257007981 | 0.25983224  | -4.83776756  | 1.31E-06    | 0.000110143 |
| ENSG00000104177.17 | MYEF2    | 627.8424251 | -1.251582016 | 0.252281971 | -4.961044227 | 7.01E-07    | 6.85E-05    |
| ENSG00000177383.4  | MAGEF1   | 260.1801503 | -1.250768401 | 0.373901139 | -3.345184785 | 0.000822278 | 0.014743439 |
| ENSG00000114405.10 | C3orf14  | 48.29325117 | -1.246174974 | 0.437684712 | -2.847197855 | 0.004410594 | 0.045877854 |
| ENSG00000223547.9  | ZNF844   | 148.7123507 | -1.223557652 | 0.321747847 | -3.802846435 | 0.000143043 | 0.00400051  |
| ENSG00000188886.3  | ASTL     | 92.22831065 | -1.221522654 | 0.362346348 | -3.371146582 | 0.00074856  | 0.013890488 |
| ENSG00000116133.11 | DHCR24   | 1341.550541 | -1.212029404 | 0.324776432 | -3.731888419 | 0.00019005  | 0.004903008 |
| ENSG00000181754.6  | AMIGO1   | 532.6450431 | -1.208745773 | 0.27115773  | -4.457721976 | 8.28E-06    | 0.000466084 |
| ENSG00000054219.10 | LY75     | 382.1651977 | -1.204451534 | 0.243814812 | -4.940026092 | 7.81E-07    | 7.37E-05    |
| ENSG00000132718.8  | SYT11    | 2840.871743 | -1.202952855 | 0.344866073 | -3.488173958 | 0.000486332 | 0.010169008 |
| ENSG00000167371.17 | PRRT2    | 63.36067822 | -1.192034779 | 0.263734478 | -4.519829144 | 6.19E-06    | 0.000369893 |
| ENSG00000266338.6  | NBPF15   | 1690.45372  | -1.179558908 | 0.140474406 | -8.396966667 | 4.58E-17    | 1.06E-13    |
| ENSG00000173208.3  | ABCD2    | 923.4670176 | -1.175683278 | 0.388982488 | -3.022458115 | 0.002507308 | 0.031520441 |
| ENSG00000203710.10 | CR1      | 157.6703345 | -1.174196357 | 0.386714761 | -3.03633705  | 0.002394715 | 0.030751829 |
| ENSG00000148700.14 | ADD3     | 4972.308395 | -1.164266077 | 0.214869595 | -5.418477549 | 6.01E-08    | 8.45E-06    |
| ENSG00000012779.10 | ALOX5    | 100.5708256 | -1.161196754 | 0.388149103 | -2.991625499 | 0.002774965 | 0.033818259 |
| ENSG00000140939.14 | NOL3     | 126.4690277 | -1.156321174 | 0.307383888 | -3.761814524 | 0.000168685 | 0.004506802 |
| ENSG00000104783.11 | KCNN4    | 969.4660391 | -1.140117165 | 0.219388865 | -5.196786831 | 2.03E-07    | 2.42E-05    |
| ENSG00000025423.11 | HSD17B6  | 19.98309756 | -1.137728674 | 0.368367849 | -3.088566704 | 0.002011245 | 0.027345312 |
| ENSG00000104447.11 | TRPS1    | 1143.233701 | -1.126685836 | 0.36779507  | -3.0633522   | 0.002188723 | 0.02921005  |
| ENSG00000171621.13 | SPSB1    | 656.2905204 | -1.105437473 | 0.219222004 | -5.042547984 | 4.59E-07    | 4.90E-05    |
| ENSG00000241945.7  | PWP2     | 173.1656834 | -1.097424808 | 0.342230966 | -3.206678872 | 0.001342768 | 0.020975368 |
| ENSG00000081059.19 | TCF7     | 18321.75569 | -1.090701654 | 0.334829548 | -3.257483276 | 0.001124049 | 0.018475777 |
| ENSG00000127311.9  | HELB     | 1941.066956 | -1.084838382 | 0.295152277 | -3.675520964 | 0.000237365 | 0.005860167 |
| ENSG00000150347.14 | ARID5B   | 2242.036263 | -1.079750716 | 0.318398273 | -3.391195268 | 0.000695885 | 0.013203406 |
| ENSG00000091409.14 | ITGA6    | 771.2773768 | -1.078578768 | 0.239898593 | -4.495977886 | 6.93E-06    | 0.00040216  |
| ENSG00000104880.17 | ARHGEF18 | 231.4286703 | -1.076842538 | 0.320052307 | -3.364582961 | 0.000766594 | 0.01411557  |
| ENSG00000178209.14 | PLEC     | 55053.61639 | -1.068502096 | 0.222571365 | -4.800716833 | 1.58E-06    | 0.000129835 |
| ENSG00000182010.10 | RTKN2    | 284.3837908 | -1.045790122 | 0.289001865 | -3.618627592 | 0.000296169 | 0.006975788 |
| ENSG00000110665.11 | C11orf21 | 205.1022806 | -1.043394758 | 0.248885788 | -4.192263313 | 2.76E-05    | 0.00116176  |
| ENSG00000121989.14 | ACVR2A   | 157.9083971 | -1.040421274 | 0.243639219 | -4.270335788 | 1.95E-05    | 0.000885964 |
| ENSG00000166387.11 | PPFIBP2  | 139.9997477 | -1.032737655 | 0.308042598 | -3.352580652 | 0.000800619 | 0.014497337 |
| ENSG00000157193.15 | LRP8     | 1075.450592 | -1.020918743 | 0.14777789  | -6.908467462 | 4.90E-12    | 2.51E-09    |
| ENSG00000167207.11 | NOD2     | 614.4566732 | -1.019303119 | 0.162476286 | -6.273550092 | 3.53E-10    | 1.15E-07    |
| ENSG00000213658.10 | LAT      | 589.5856081 | -1.017838492 | 0.234877243 | -4.333491316 | 1.47E-05    | 0.000713135 |
| ENSG00000186174.12 | BCL9L    | 7037.126189 | -1.017152774 | 0.207153761 | -4.910134237 | 9.10E-07    | 8.32E-05    |
| ENSG00000110881.11 | ASIC1    | 214.9440607 | -1.016184653 | 0.355184649 | -2.861003864 | 0.004223019 | 0.044870359 |
| ENSG00000181690.7  | PLAG1    | 477.8551748 | -1.006929611 | 0.19633022  | -5.128755056 | 2.92E-07    | 3.35E-05    |
| ENSG00000139679.15 | LPAR6    | 960.5100264 | -1.00644404  | 0.255107991 | -3.945168623 | 7.97E-05    | 0.002577544 |
| ENSG00000196381.10 | ZNF781   | 39.84236765 | -1.005242528 | 0.313266747 | -3.208902758 | 0.001332425 | 0.020864968 |
| ENSG00000164466.12 | SFXN1    | 3486.620444 | -1.000816264 | 0.291904331 | -3.428576271 | 0.000606756 | 0.012037771 |
